# Supplementary material
Source: publisher figshare collection journal article supplement (https://acs.figshare.com/ndownloader/files/5504702)
Supplement: Supplementary file 1 [file 5504702]

# Taste-Active Maillard Reaction Products in Roasted Garlic (*Allium Sativum*)

Junichiro Wakamatsu, Timo D. Stark, Thomas Hofmann

Chair of Food Chemistry and Molecular Sensory Science, Technische

Universität München, Lise-Meitner Str. 34, D-85354, Freising, Germany

## List of Supporting Information

### 1. Analytical conditions for purification of crude fractions (GS-1, 2, 3, 4, 5 and 6)

Table S1. Analytical conditions for HPLC purifications and retention times for collected peaks

### 2. MS and NMR data of compounds **1-9** acortatarin A (compound **1**)

Figure S1. HRESIMS (positive) spectrum

Figure S2. Elemental composition report of the precursor ion

Figure S3.  $^1\text{H}$  NMR spectrum ( $\text{DMSO-}d_6$ , 400 MHz)

Figure S4.  $^{13}\text{C}$  NMR spectrum ( $\text{DMSO-}d_6$ , 100 MHz)

Figure S5. COSY correlations

Figure S6. HSQC correlations

Figure S7. HMBC correlations

### pollenopyrroside A (compound **2**)

Figure S8. HRESIMS (positive) spectrum

Figure S9. Elemental composition report of the precursor ion

Figure S10.  $^1\text{H}$  NMR spectrum ( $\text{DMSO-}d_6$ , 500 MHz)

Figure S11.  $^{13}\text{C}$  NMR spectrum ( $\text{DMSO-}d_6$ , 125 MHz)

Figure S12. COSY correlations

Figure S13. HSQC correlations

Figure S14. HMBC correlations

### *epi*-acortatarin A (compound **3**)

Figure S15. HRESIMS (positive) spectrum

Figure S16. Elemental composition report of the precursor ion

Figure S17.  $^1\text{H}$  NMR spectrum ( $\text{DMSO-}d_6$ , 400 MHz)

Figure S18.  $^{13}\text{C}$  NMR spectrum ( $\text{DMSO-}d_6$ , 100 MHz)

Figure S19. COSY correlations

Figure S20. HSQC correlations

Figure S21. HMBC correlations

#### xylapyrroside A (compound **4**)

Figure S22. HRESIMS (positive) spectrum

Figure S23. Elemental composition report of the precursor ion

Figure S24.  $^1\text{H}$  NMR spectrum (DMSO- $d_6$ , 400 MHz)

Figure S25.  $^{13}\text{C}$  NMR spectrum (DMSO- $d_6$ , 100 MHz)

Figure S26. COSY correlations

Figure S27. HSQC correlations

Figure S28. HMBC correlations

#### 5-hydroxymethyl-1-[(5-hydroxymethyl-2-furanyl)methyl]-1*H*-pyrrole-2-carbaldehyde (compound **5**)

Figure S29. HRESIMS (positive) spectrum

Figure S30. Elemental composition report of the precursor ion

Figure S31.  $^1\text{H}$  NMR spectrum (DMSO- $d_6$ , 400 MHz)

Figure S32.  $^{13}\text{C}$  NMR spectrum (DMSO- $d_6$ , 100 MHz)

Figure S33. COSY NMR correlations

Figure S34. HSQC NMR correlations

Figure S35. HMBC NMR correlations

#### 3-(allylthio)-2-(2-formyl-5-hydroxymethyl-1*H*-pyrrol-1-yl)propanoic acid (compound **6**)

Figure S36. HRESIMS (negative) spectrum

Figure S37. Elemental composition report of the precursor ion

Figure S38.  $^1\text{H}$  NMR spectrum (DMSO- $d_6$ , 400 MHz)

Figure S39.  $^{13}\text{C}$  NMR spectrum (DMSO- $d_6$ , 100 MHz)

Figure S40. COSY correlations

Figure S41. HSQC correlations

Figure S42. HMBC correlations

(4*S*)-4-allylthiomethyl-3,4-dihydro-3-oxo-1*H*-pyrrolo[2,1-*c*][1,4]oxazine-6-carbaldehyde (compound **7**)

Figure S43. HRESIMS (negative) spectrum

Figure S44. Elemental composition report of the precursor ion

Figure S45. <sup>1</sup>H NMR spectrum (DMSO-*d*<sub>6</sub>, 500 MHz)

Figure S46. <sup>13</sup>C NMR spectrum (DMSO-*d*<sub>6</sub>, 125 MHz)

Figure S47. COSY correlations

Figure S48. HSQC correlations

Figure S49. HMBC correlations

(2*R*)-3-(allylthio)-2-((4*R*)-4-(allylthiomethyl)-6-formyl-3-oxo-3,4-dihydropyrrolo[1,2-*a*]pyrazin-2(1*H*)-yl)propanoic acid (compound **8**)

Figure S50 Chromatograms of compounds **8** and **9** recorded by UV detection (290 nm) using UPLC-TOF-MS

Figure S51. HRESIMS (negative) spectrum

Figure S52. Elemental composition report of the precursor ion

Figure S53. <sup>1</sup>H NMR spectrum (DMSO-*d*<sub>6</sub>, 500 MHz)

Figure S54. <sup>13</sup>C NMR spectrum (DMSO-*d*<sub>6</sub>, 125 MHz)

Figure S55. COSY correlations

Figure S56. HSQC correlations

Figure S57. HMBC correlations

(2*R*)-3-(allylthio)-2-((4*S*)-4-(allylthiomethyl)-6-formyl-3-oxo-3,4-dihydropyrrolo[1,2-*a*]pyrazin-2(1*H*)-yl)propanoic acid (compound **9**)

Figure S58. HRESIMS (negative) spectrum

Figure S59. Elemental composition report of the precursor ion

Figure S60. <sup>1</sup>H NMR spectrum (DMSO-*d*<sub>6</sub>, 500 MHz)

Figure S61. <sup>13</sup>C NMR spectrum (DMSO-*d*<sub>6</sub>, 125 MHz)

Figure S62. COSY correlations

Figure S63. HSQC correlations

Figure S64. HMBC correlations

2-(allylthioethyl)-4-(allylthiomethyl)-3-oxo-3,4-dihydropyrrolo[1,2a]pyrazin-2(1*H*)-6-carbaldehyde (racemate of compound **10** and **11**)

Figure S64. HRESIMS (negative) spectrum

Figure S65. Elemental composition report of the precursor ion

Figure S66. <sup>1</sup>H NMR spectrum (DMSO-*d*<sub>6</sub>, 500 MHz)

Figure S67. <sup>13</sup>C NMR spectrum (DMSO-*d*<sub>6</sub>, 125 MHz)

Figure S68. COSY correlations

Figure S69. HSQC correlations

Figure S70. HMBC correlations

Figure S71. CD spectra of Maillard reaction product **7** (green) and synthesized references **10** (blue) and **11** (red)

### 3. Analytical conditions for quantitative analysis on identified compounds in garlic preparations

Table S2. UPLC-MS/MS (ESI) parameters for quantitative analysis on identified compounds.

1. Analytical conditions for purification of crude fractions (GS-1, 2, 3, 4, 5 and 6)

|      | Gradient conditions                                                         | Collected peaks                                                                               |
|------|-----------------------------------------------------------------------------|-----------------------------------------------------------------------------------------------|
| GS-1 | 12.5%B → 12.5%B → 18%B → 95%B<br>0 min      3 min      15 min      17.5 min | 10.3 min (Compound.1)                                                                         |
| GS-2 | 12.5%B → 12.5%B → 18%B → 95%B<br>0 min      3 min      15 min      17.5 min | 11.4 min (Compound.2), 12.4 min (Compound.3),<br>13.3 min (Compound.4), 14.8 min (Compound.5) |
| GS-3 | 30%B → 30%B → 80%B<br>0 min      3 min      18 min                          | 7.6 min (Compound.6)                                                                          |
| GS-4 | 30%B → 30%B → 80%B<br>0 min      3 min      18 min                          | 12.8 min (Compound.7)                                                                         |
| GS-5 | 40%B → 40%B → 80%B<br>0 min      3 min      20 min                          | 11.4 min (Compound.8)                                                                         |
| GS-6 | 30%B → 30%B → 80%B<br>0 min      3 min      20 min                          | 14.9 min (Compound.9)                                                                         |

Table S1. Analytical conditions for HPLC purifications and retention times for collected peaks.

## 2. MS and NMR data of compound **1-9**

### Acortatarin A (**1**)

Jun

30052015\_MRGS X1a 470 (1.848) Cm (468:471)

1: TOF MS ES+  
9.11e5

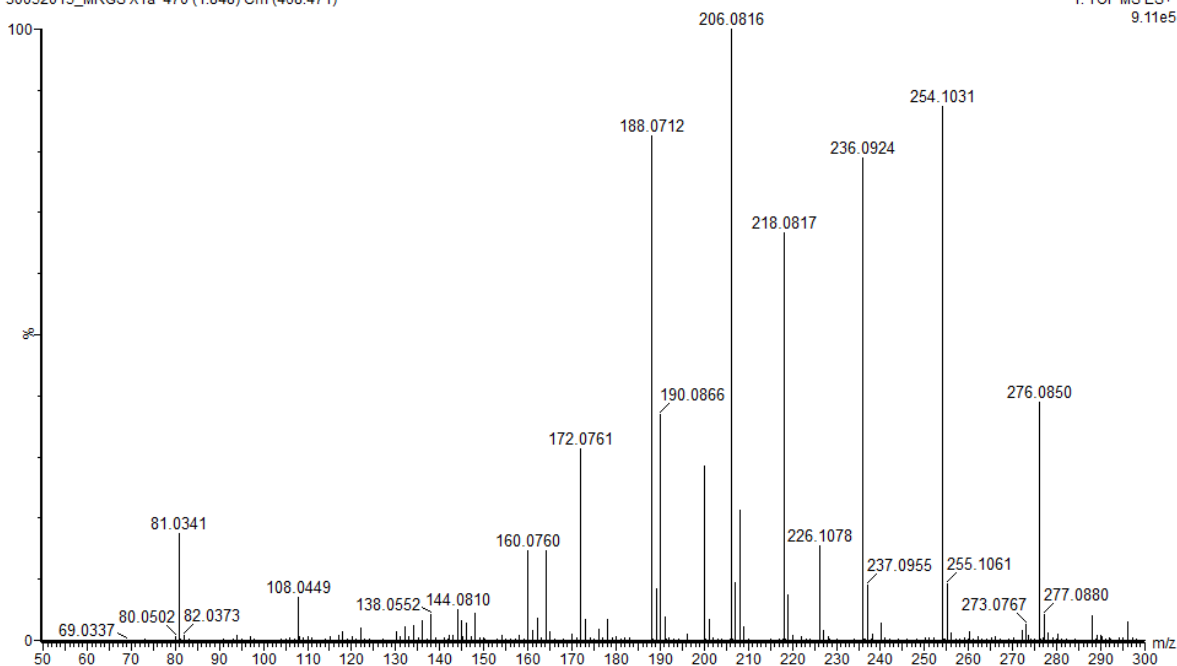

Figure S1. HRESIMS (positive) spectra

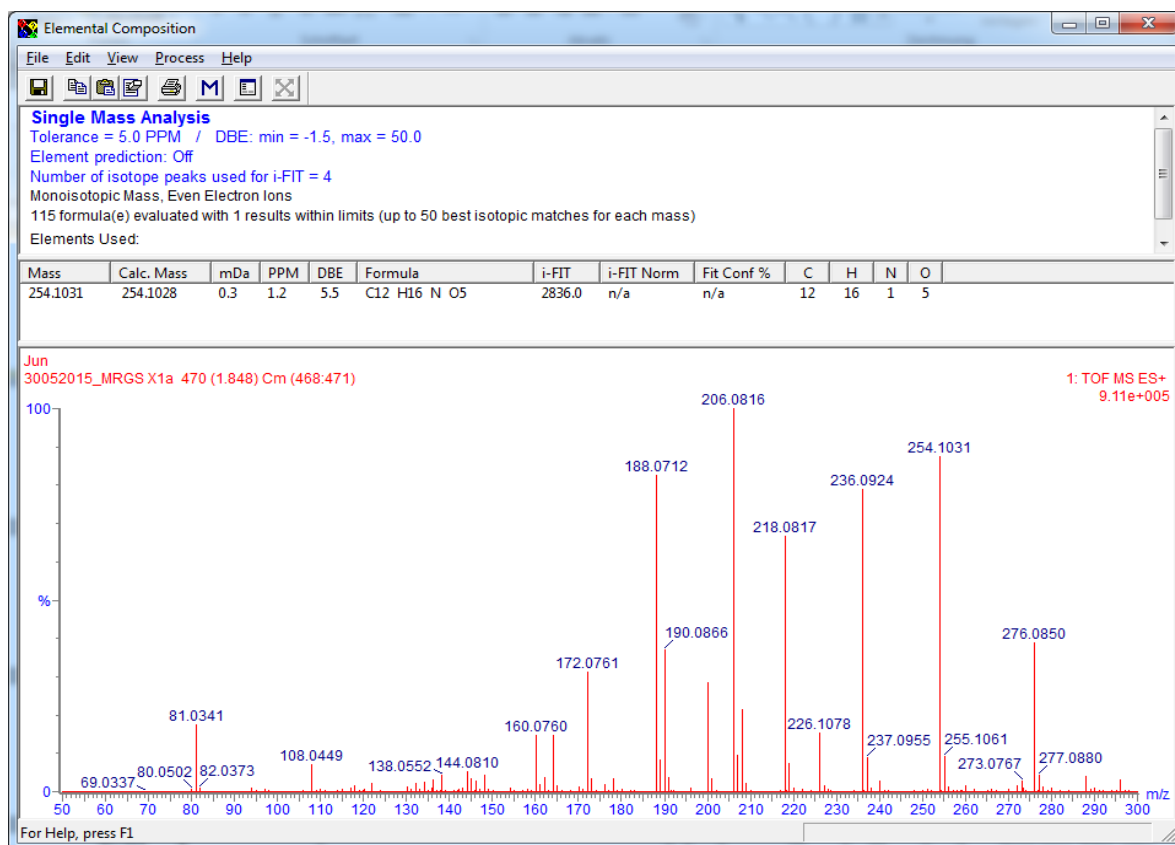

Figure S2. Elemental composition report of the precursor ion

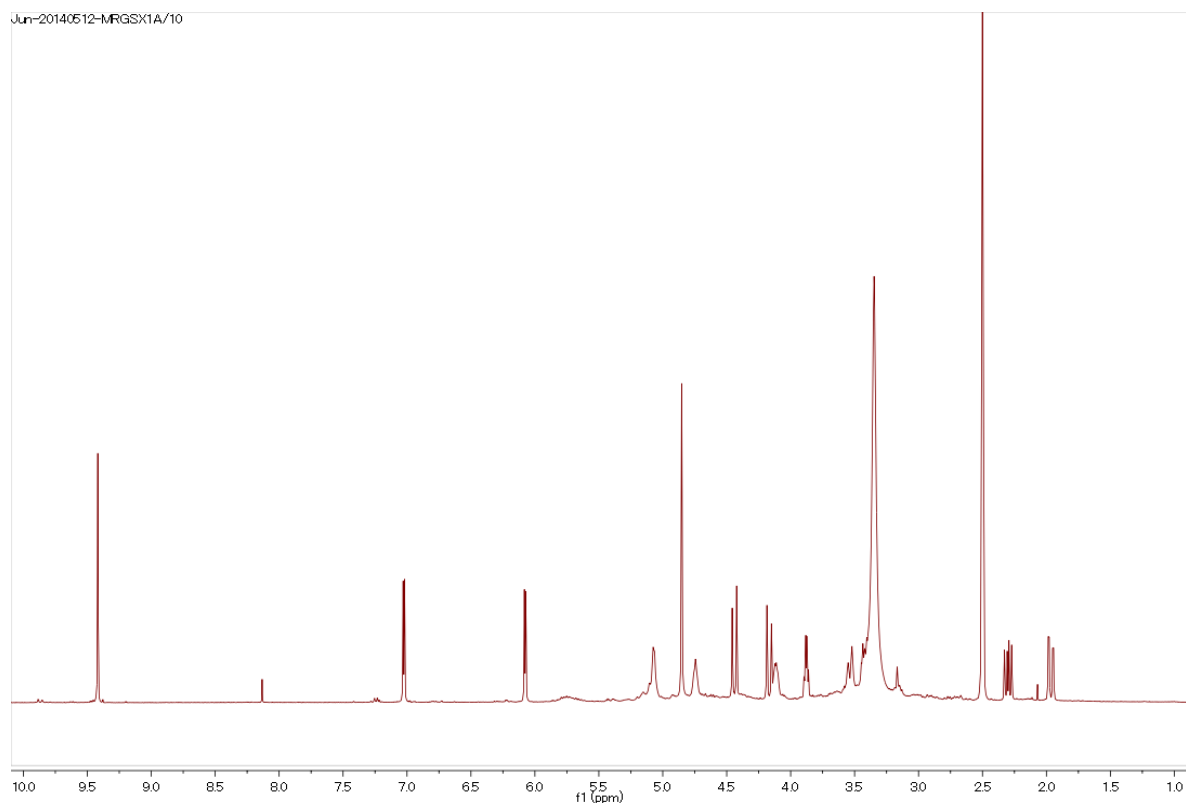

Figure S3.  $^1\text{H}$  NMR spectrum (DMSO- $d_6$ , 400 MHz)

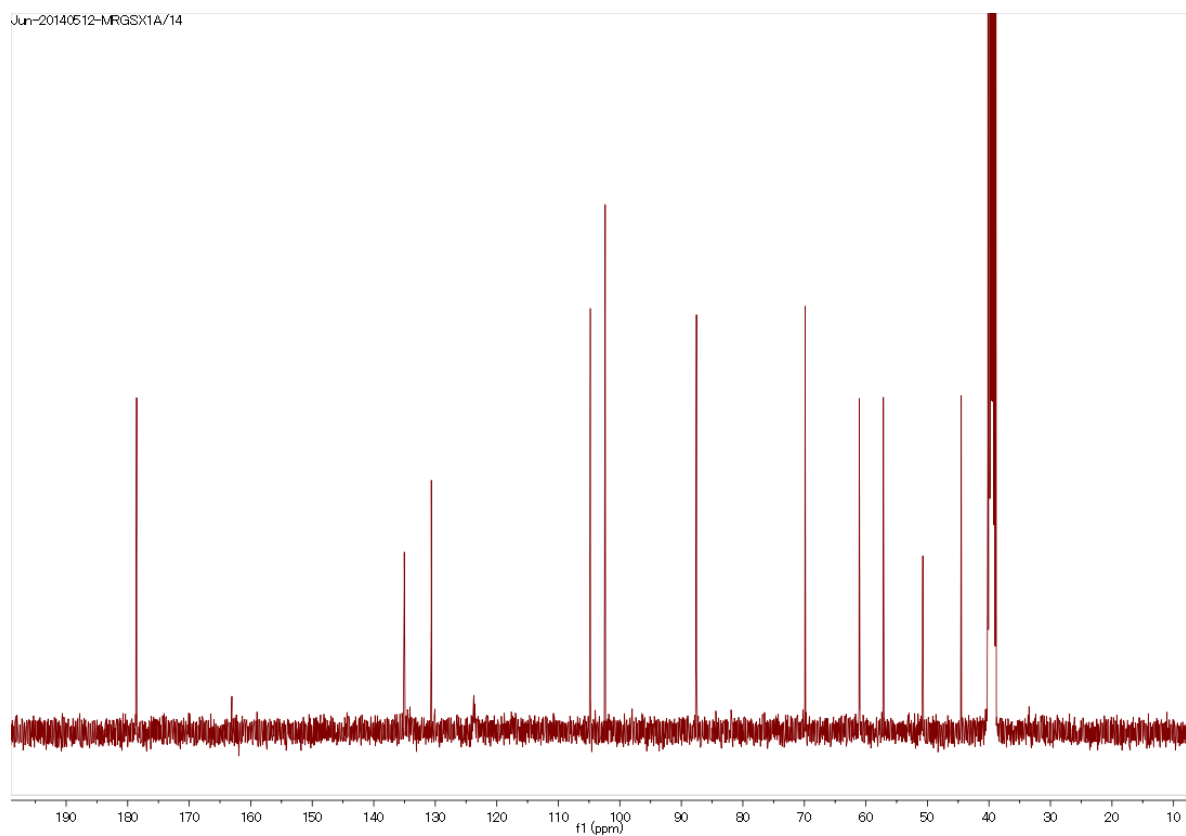

Figure S4.  $^{13}\text{C}$  NMR spectrum (DMSO- $d_6$ , 100 MHz)



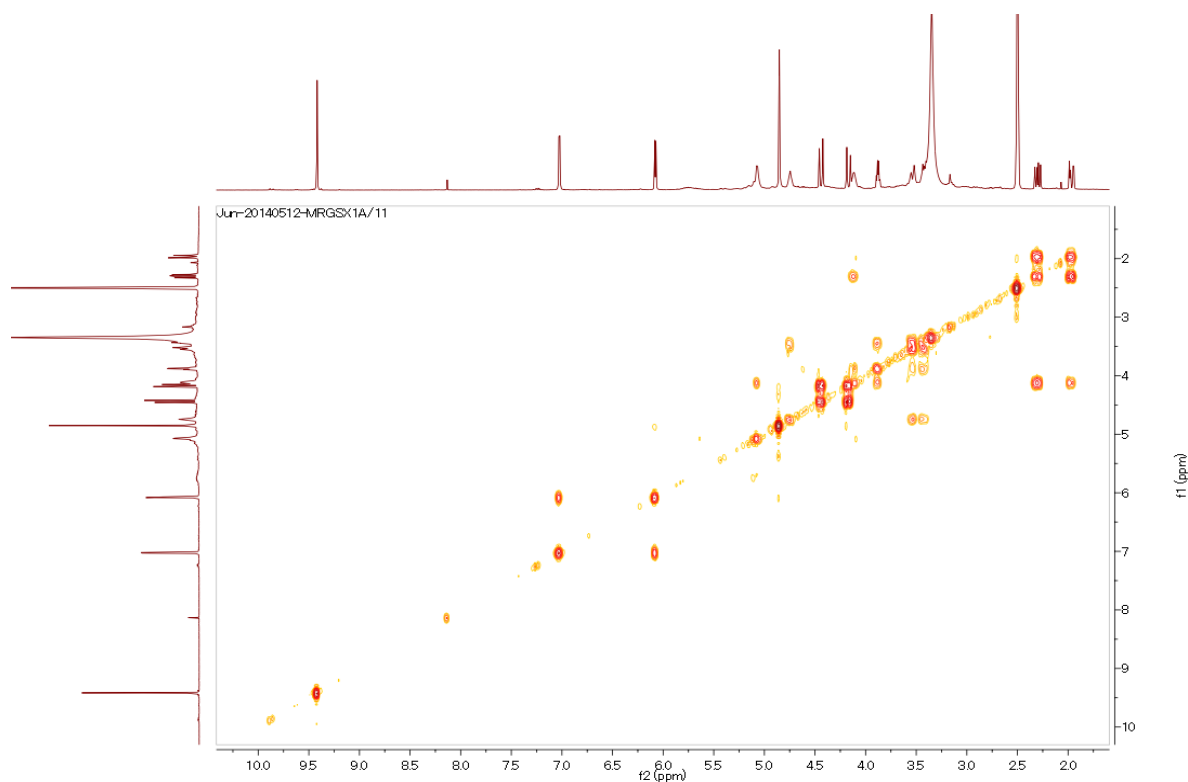

Figure S5. COSY correlations

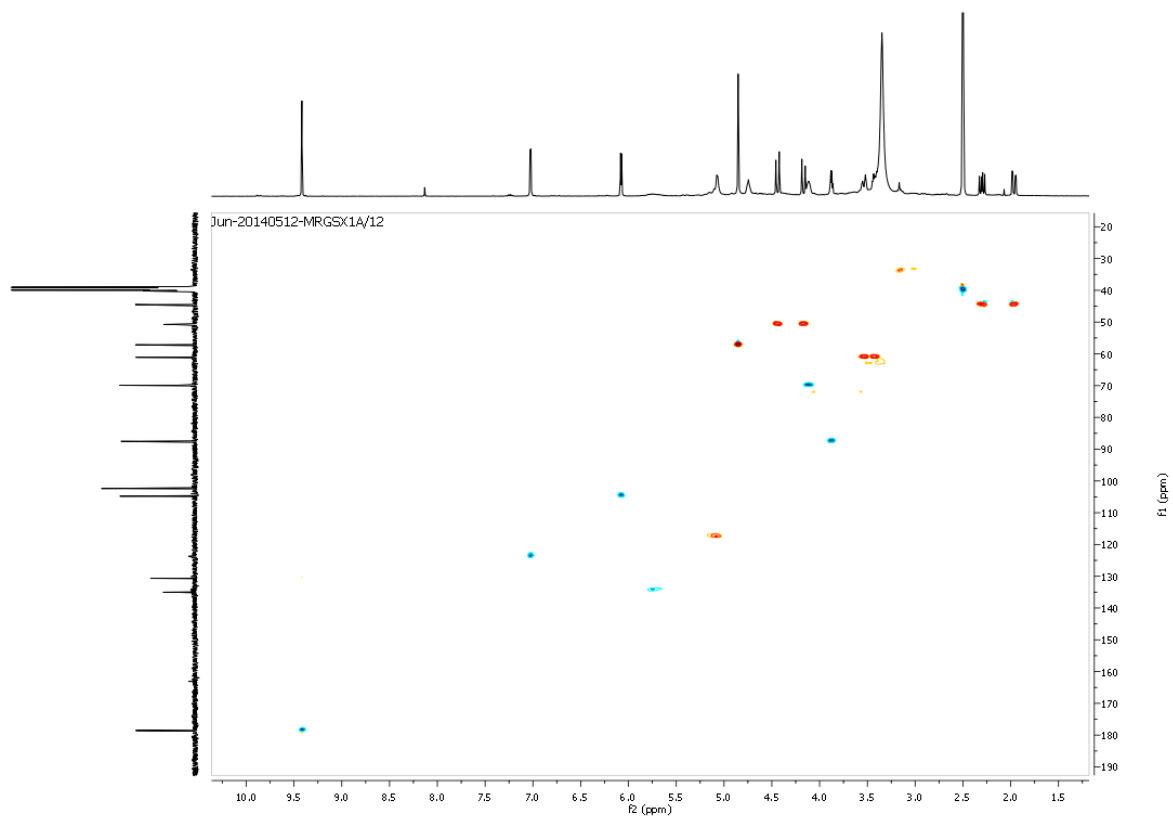

Figure S6. HSQC correlations

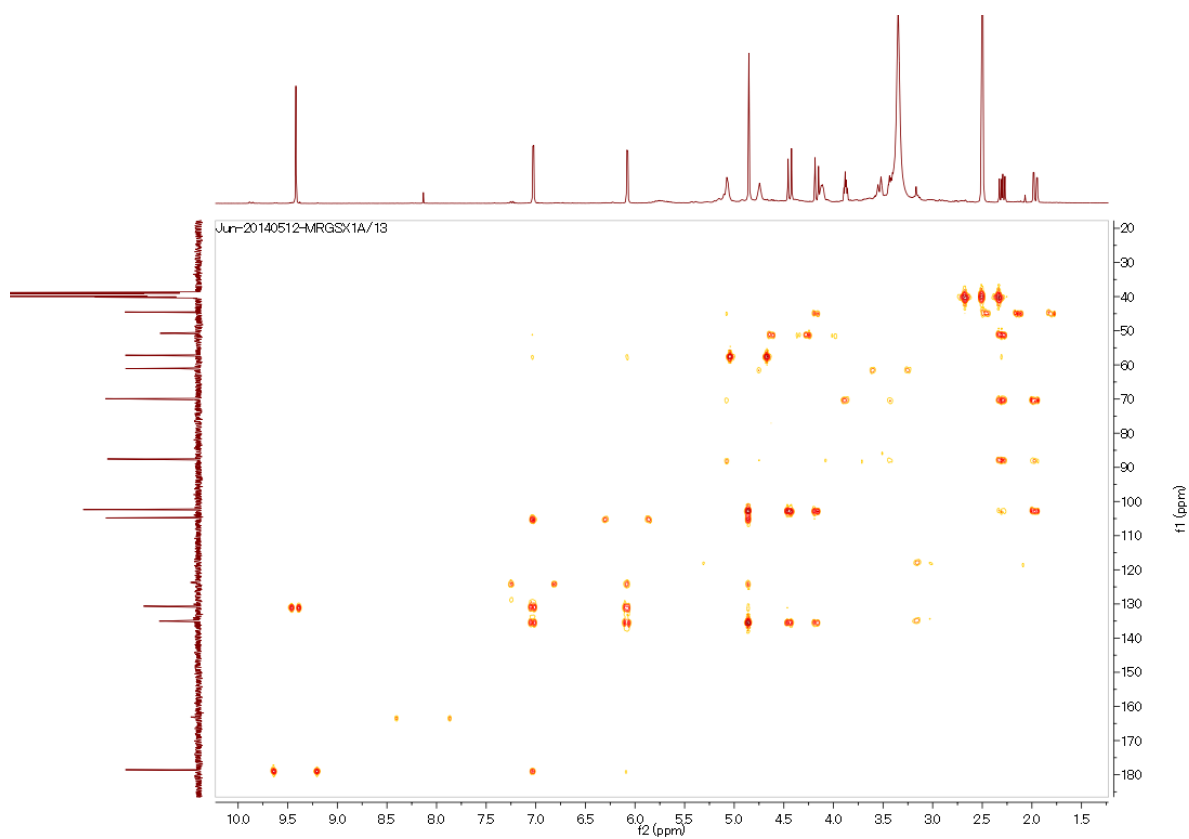

Figure S7. HMBC correlations

## Pollenopyrroside A (2)

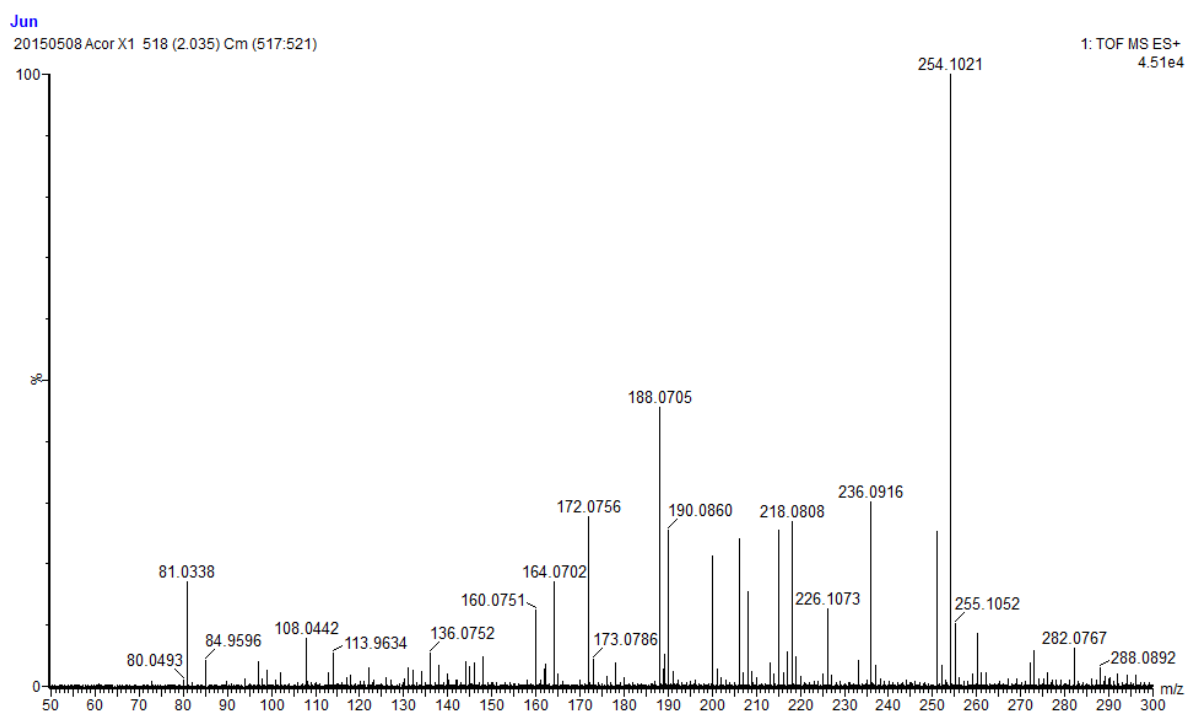

Figure S8. HRESIMS (positive) spectra

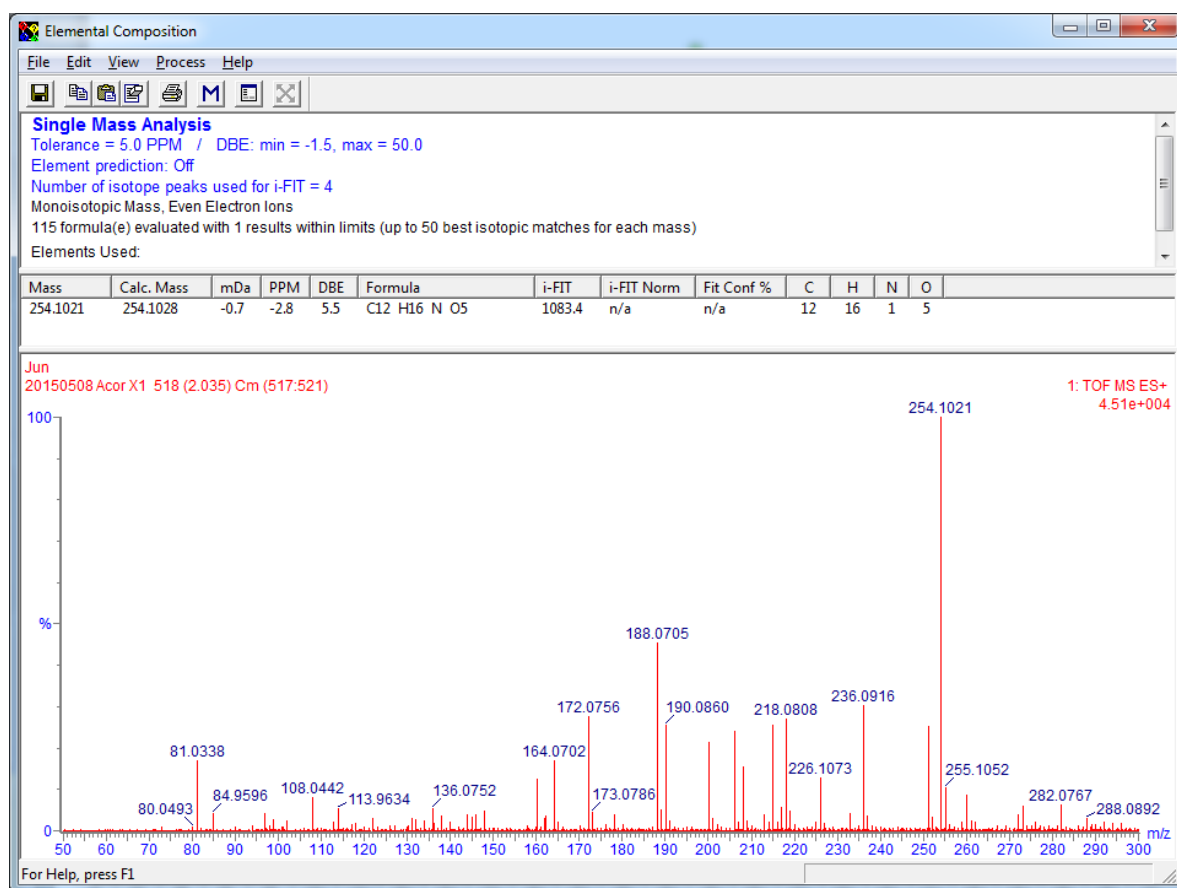

Figure S9. Elemental composition report of the precursor ion

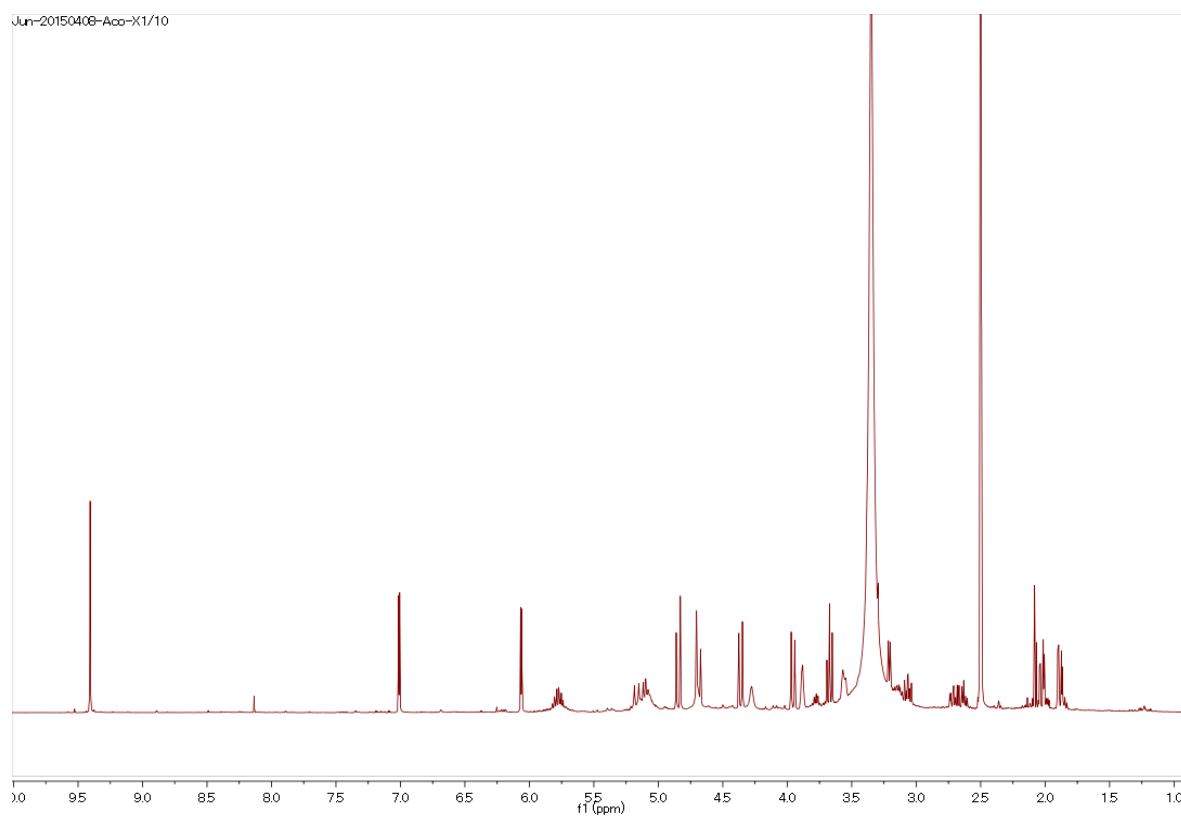

Figure S10.  $^1\text{H}$  NMR spectrum (DMSO- $d_6$ , 500 MHz)

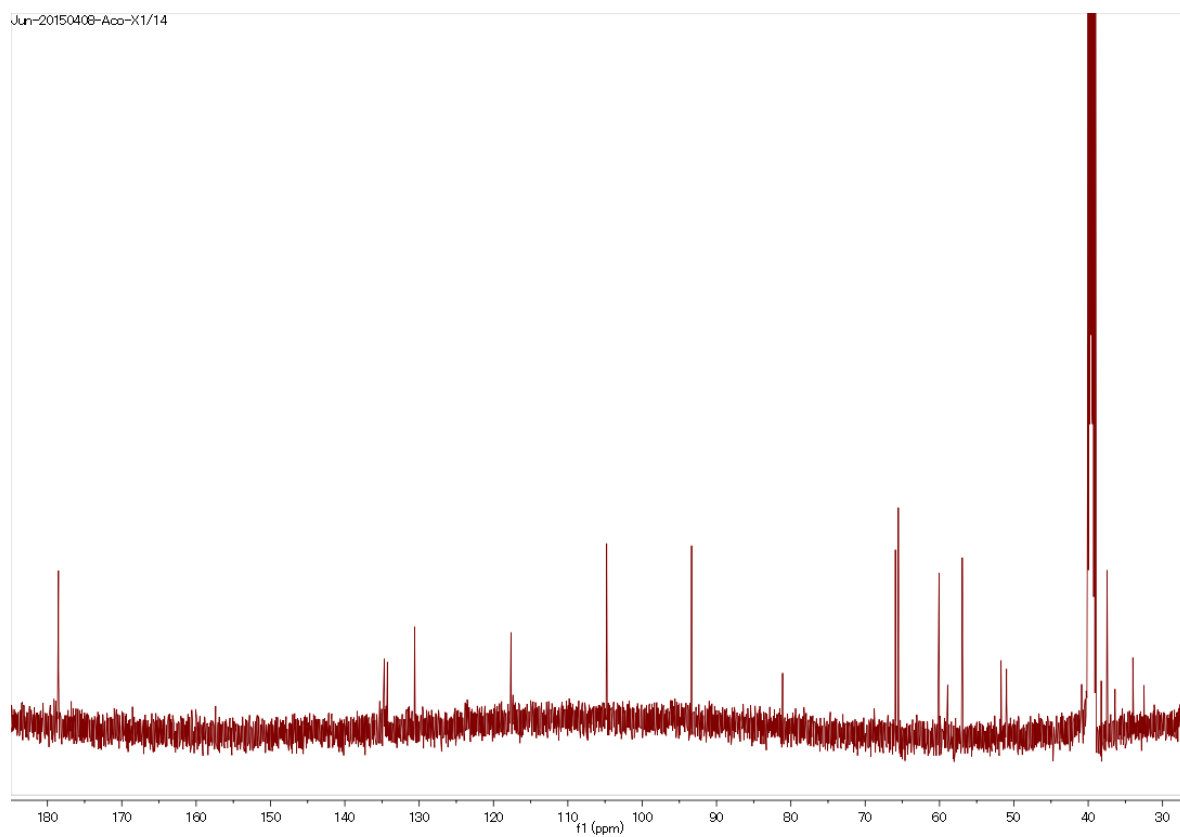

Figure S11.  $^{13}\text{C}$  NMR spectrum (DMSO- $d_6$ , 125 MHz)

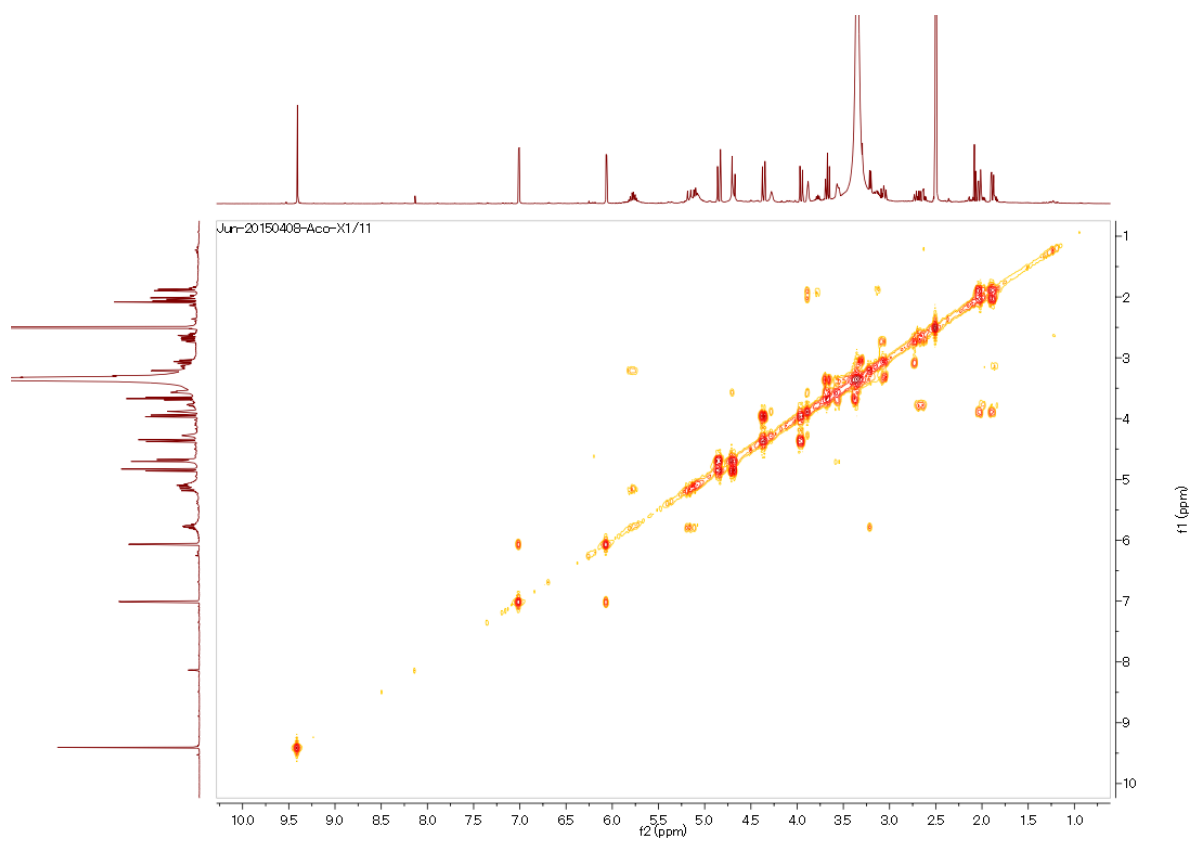

Figure S12. COSY correlations

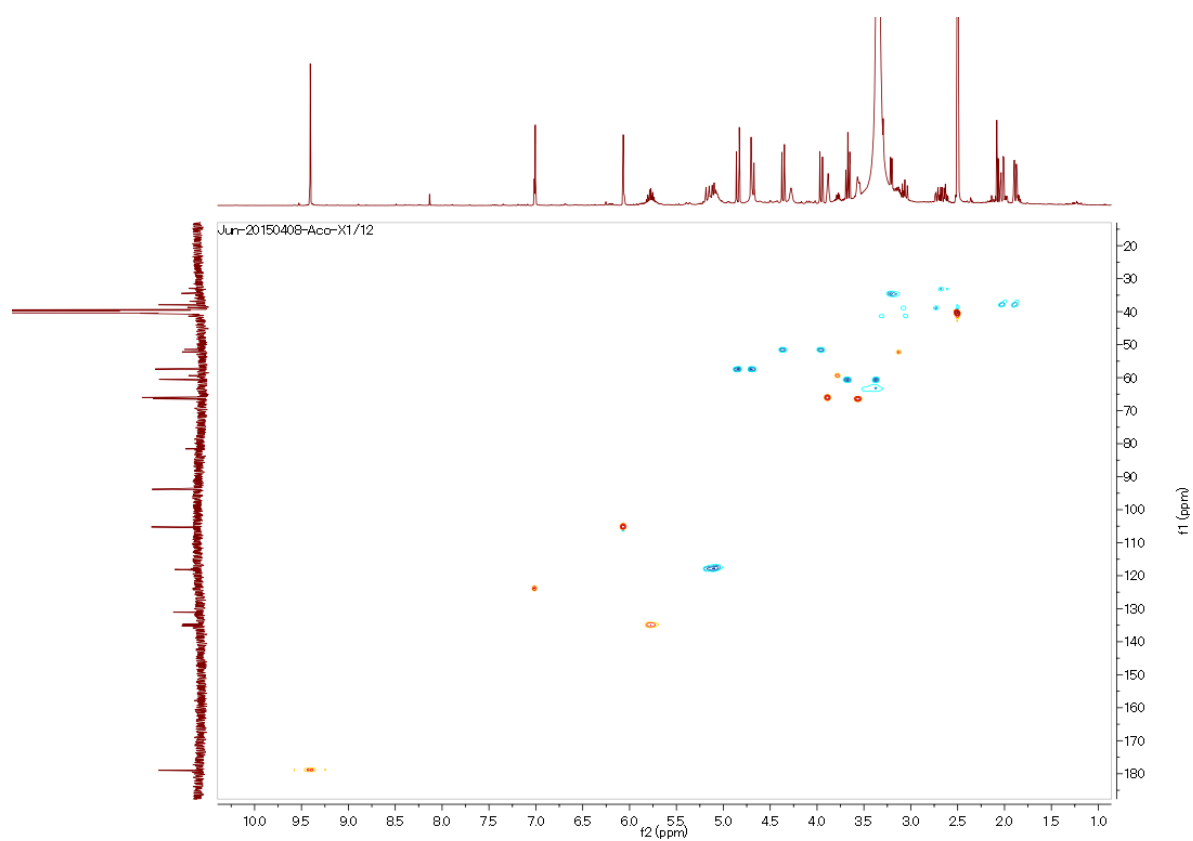

Figure S13. HSQC correlations

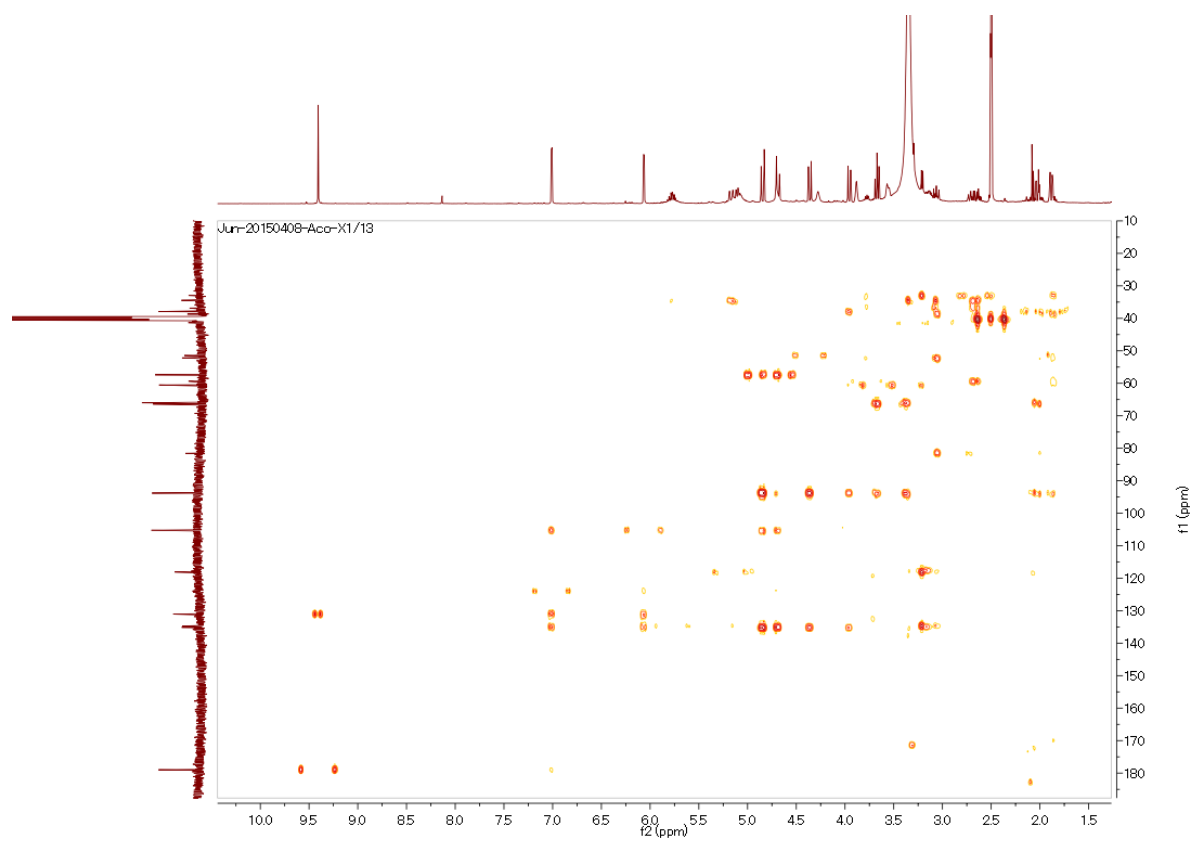

Figure S14. HMBC correlations

## *epi*-Acortatarin A (3)

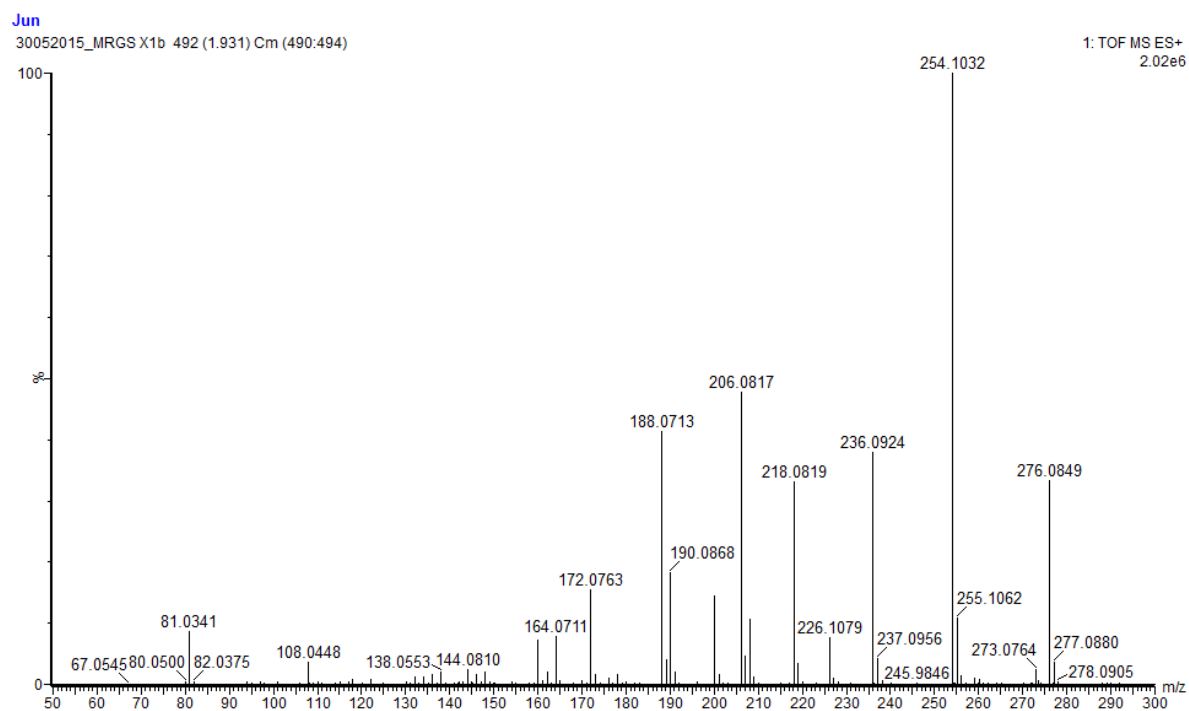

Figure S15. HRESIMS (positive) spectrum

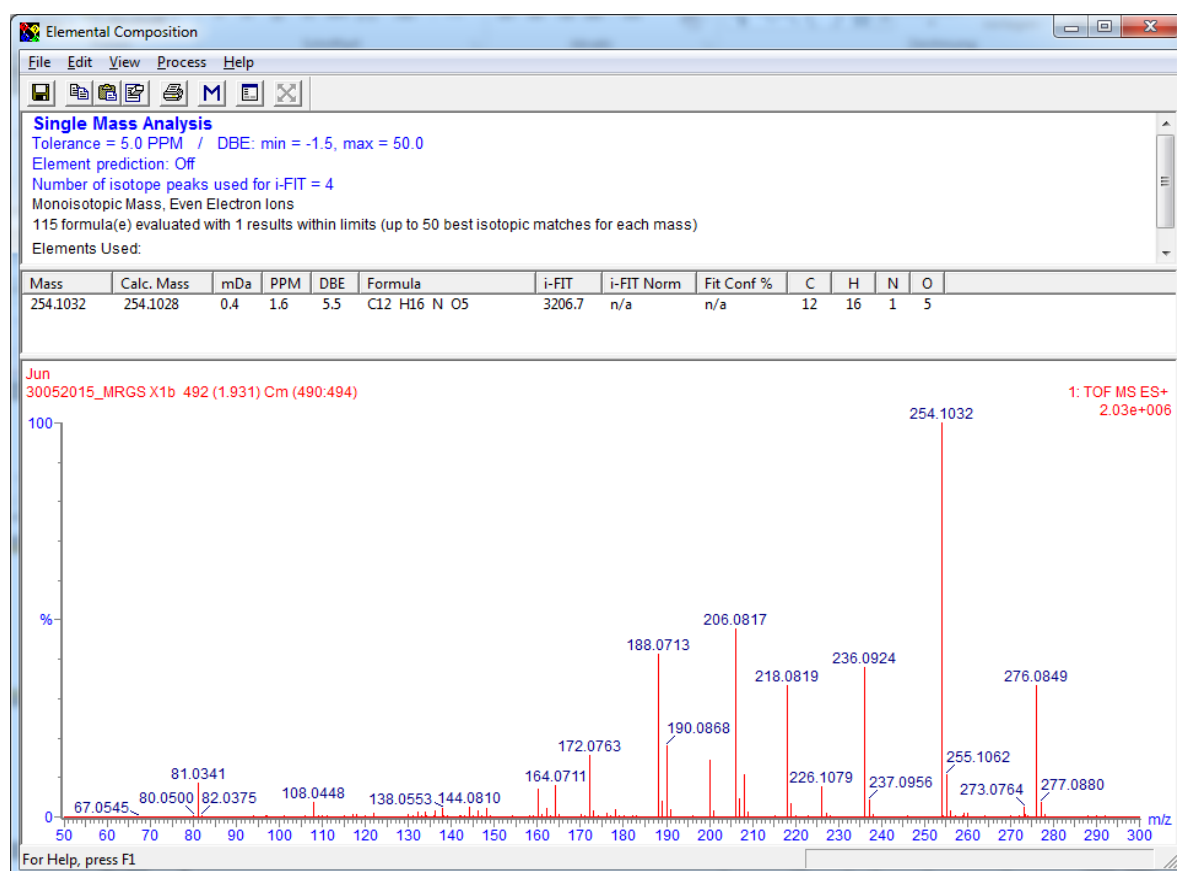

Figure S16. Elemental composition report of the precursor ion

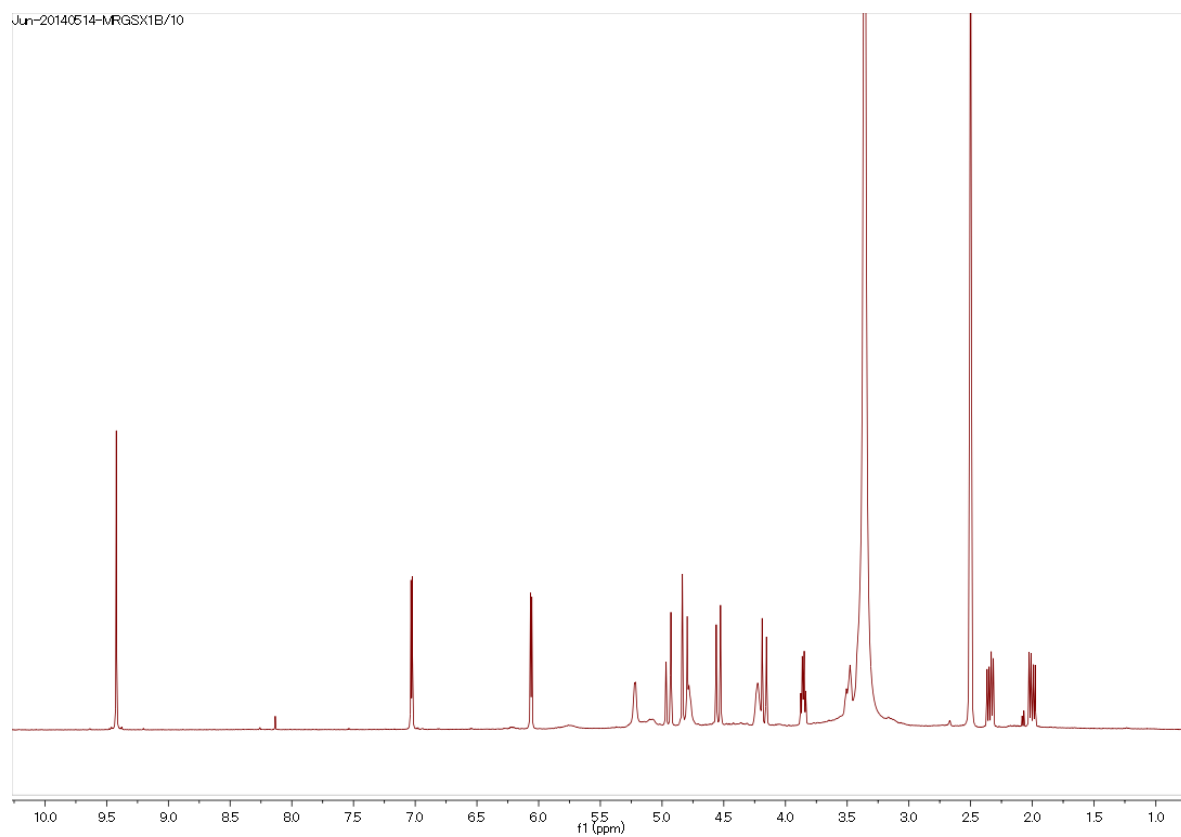

Figure S17.  $^1\text{H}$  NMR spectrum (DMSO- $d_6$ , 400 MHz)

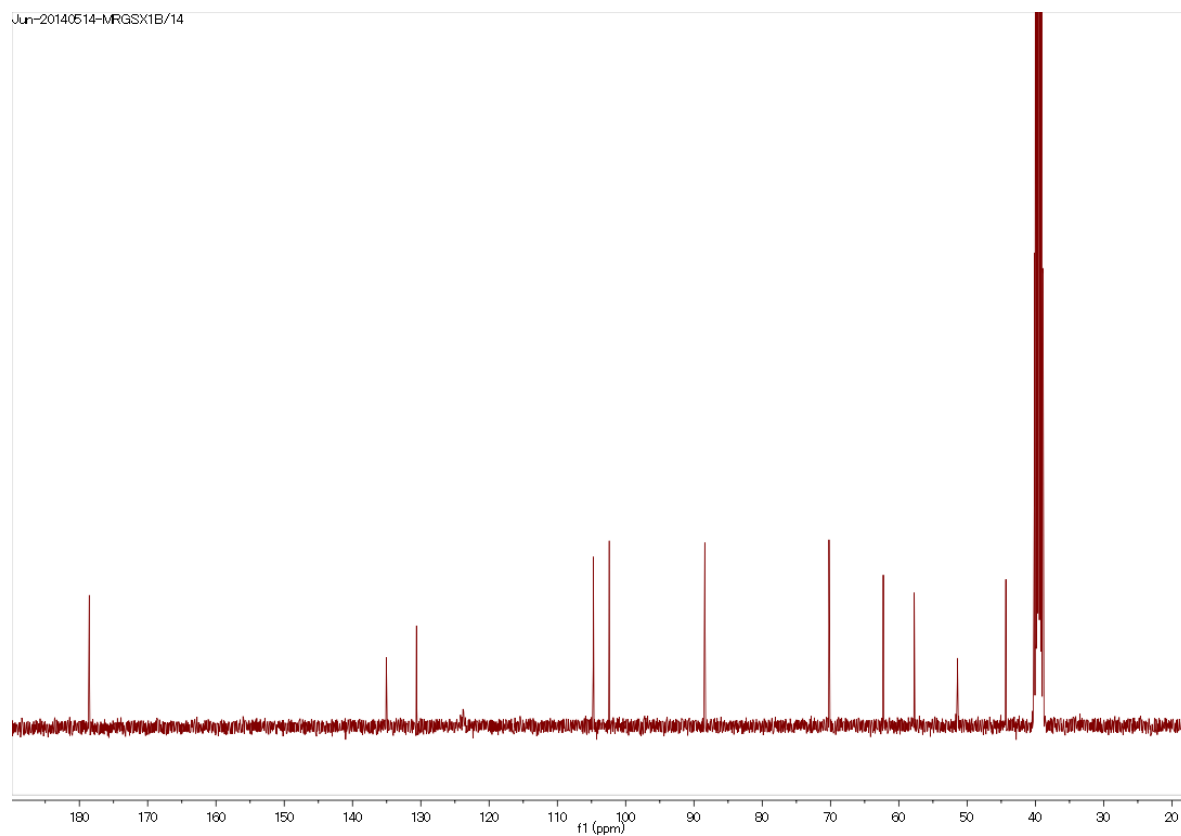

Figure S18.  $^{13}\text{C}$  NMR spectrum (DMSO- $d_6$ , 100 MHz)

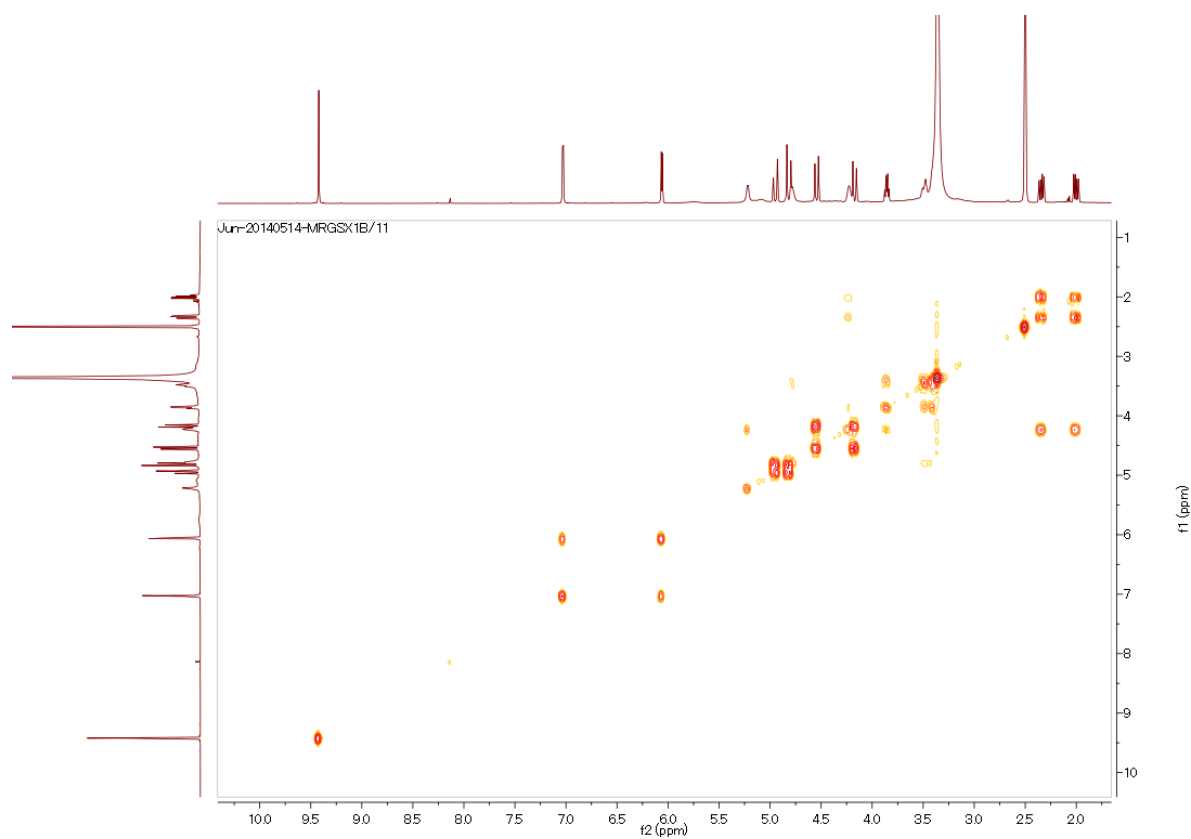

Figure S19. COSY correlations

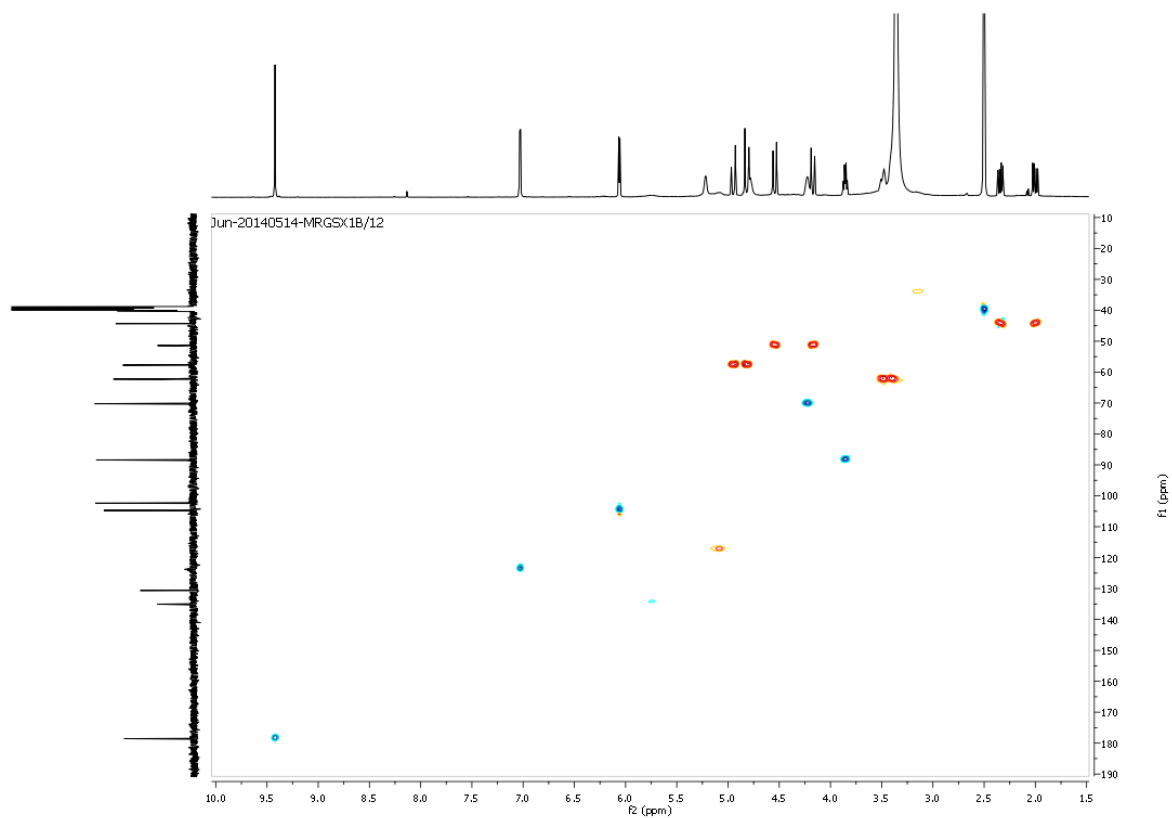

Figure S20. HSQC correlations



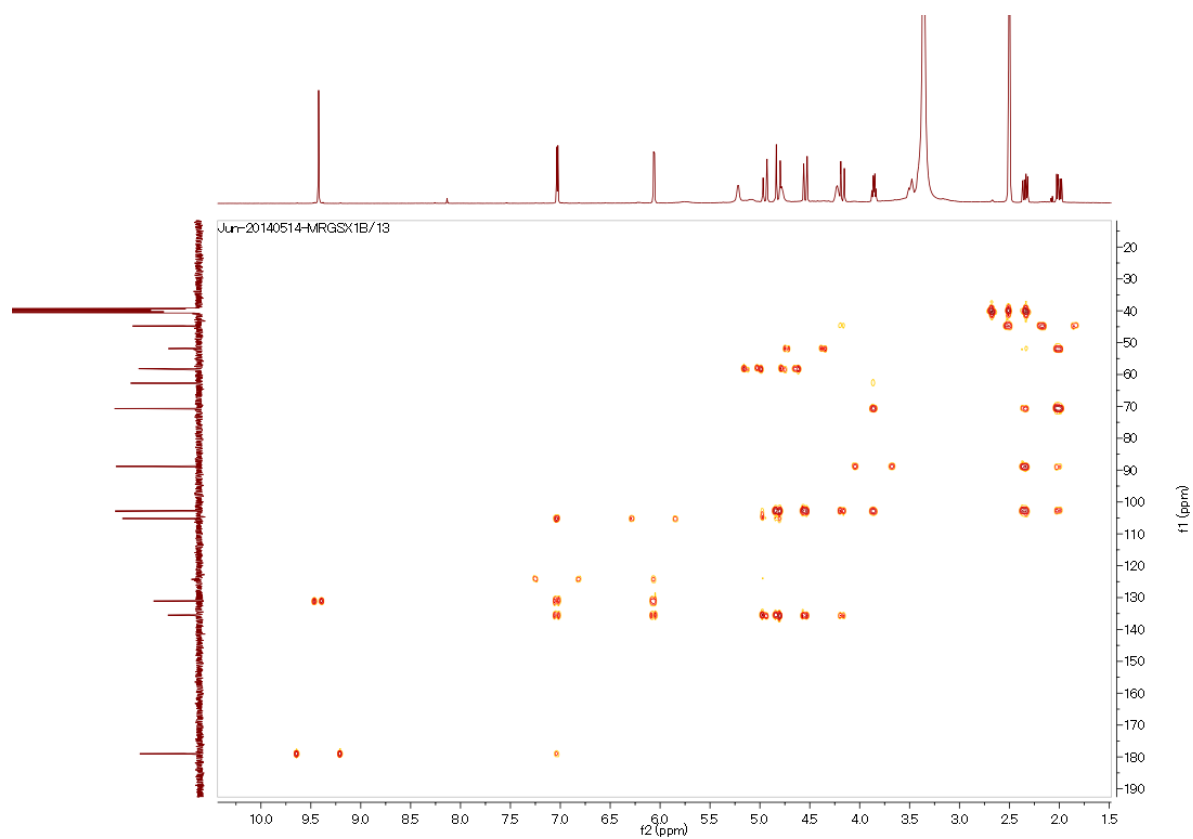

Figure S21. HMBC correlations

## Xylapyrroside A (4)

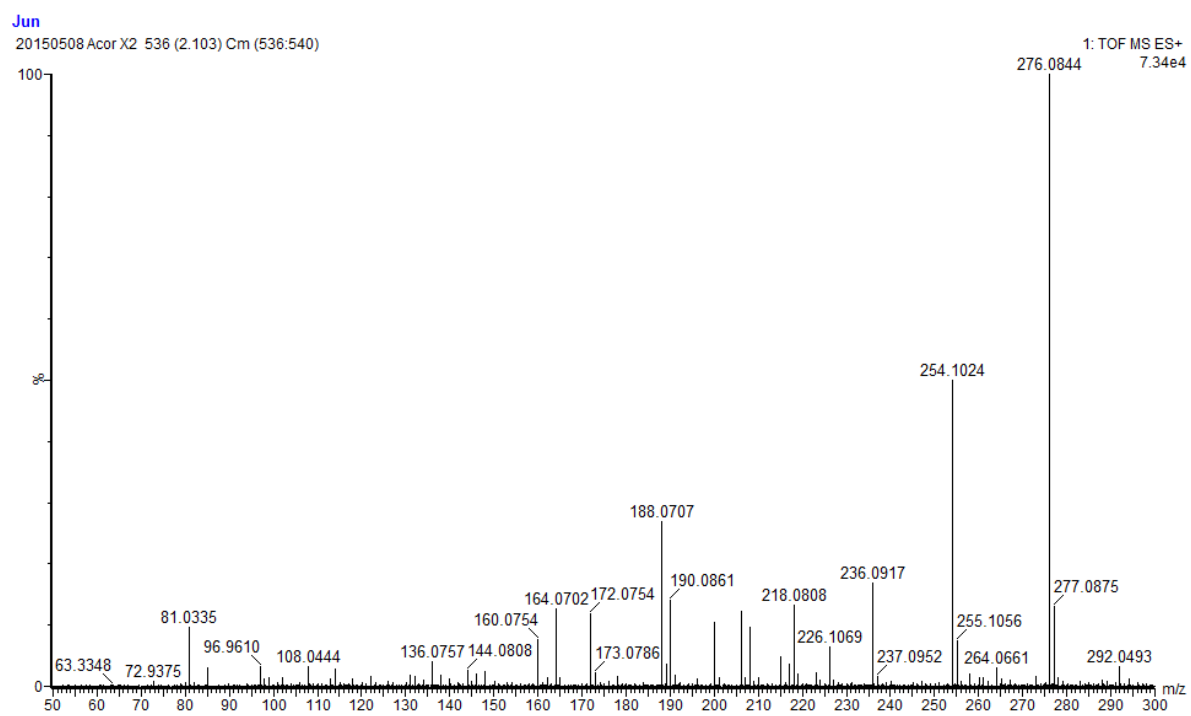

Figure S22. HRESIMS (positive) spectrum

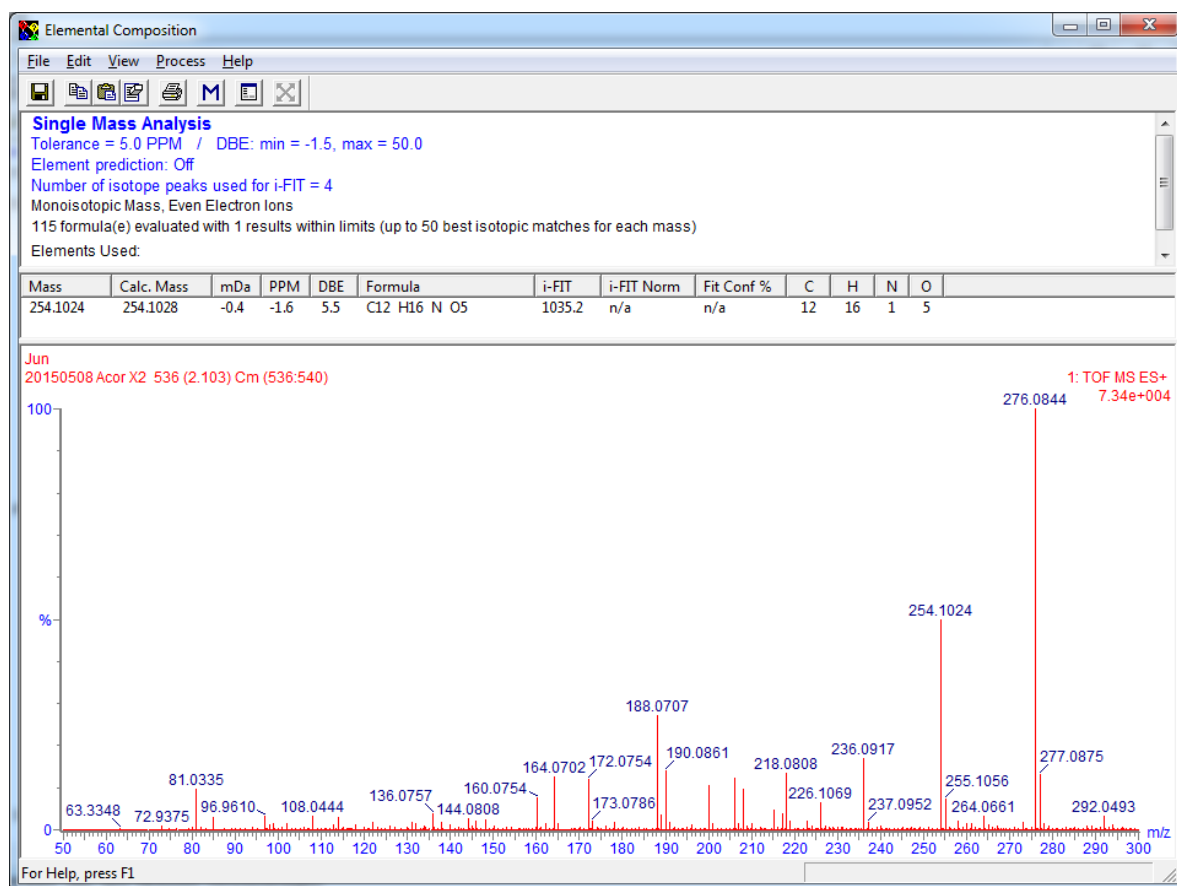

Figure S23. Elemental composition report of the precursor ion

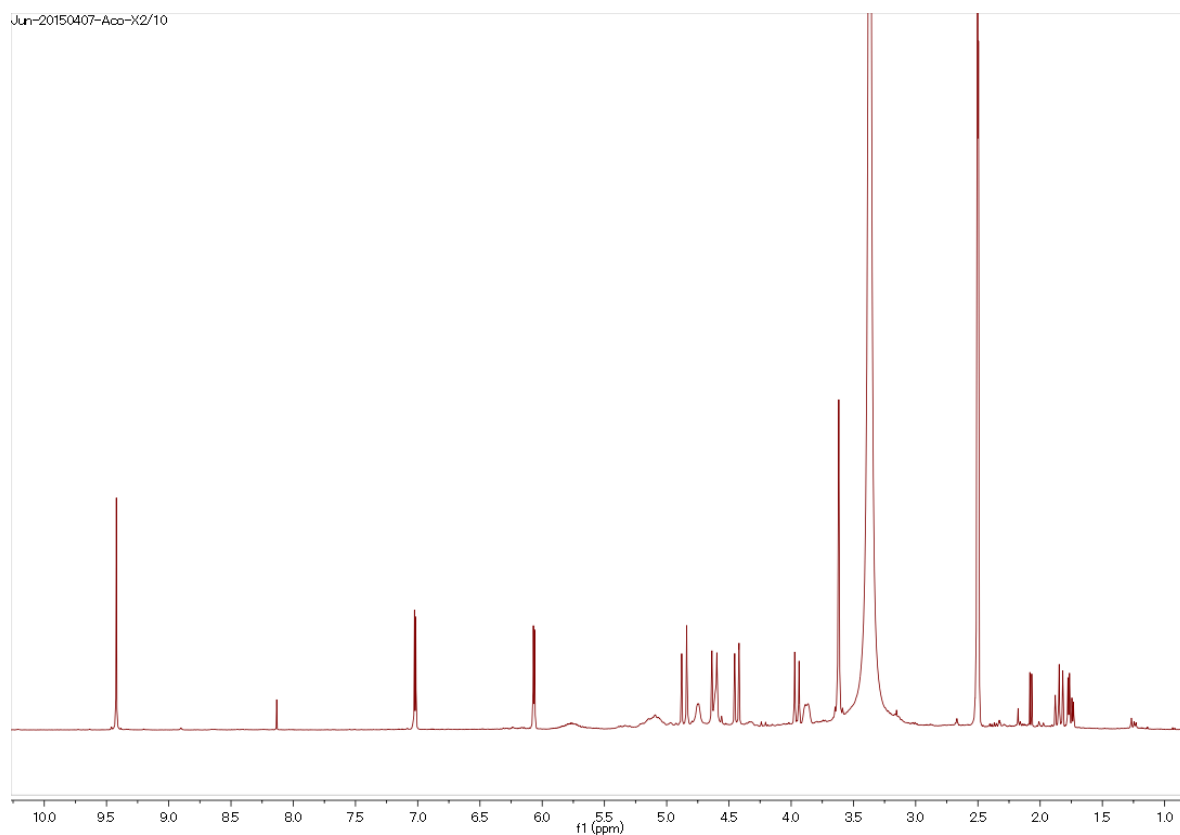

Figure S24.  $^1\text{H}$  NMR spectrum (DMSO- $d_6$ , 400 MHz)

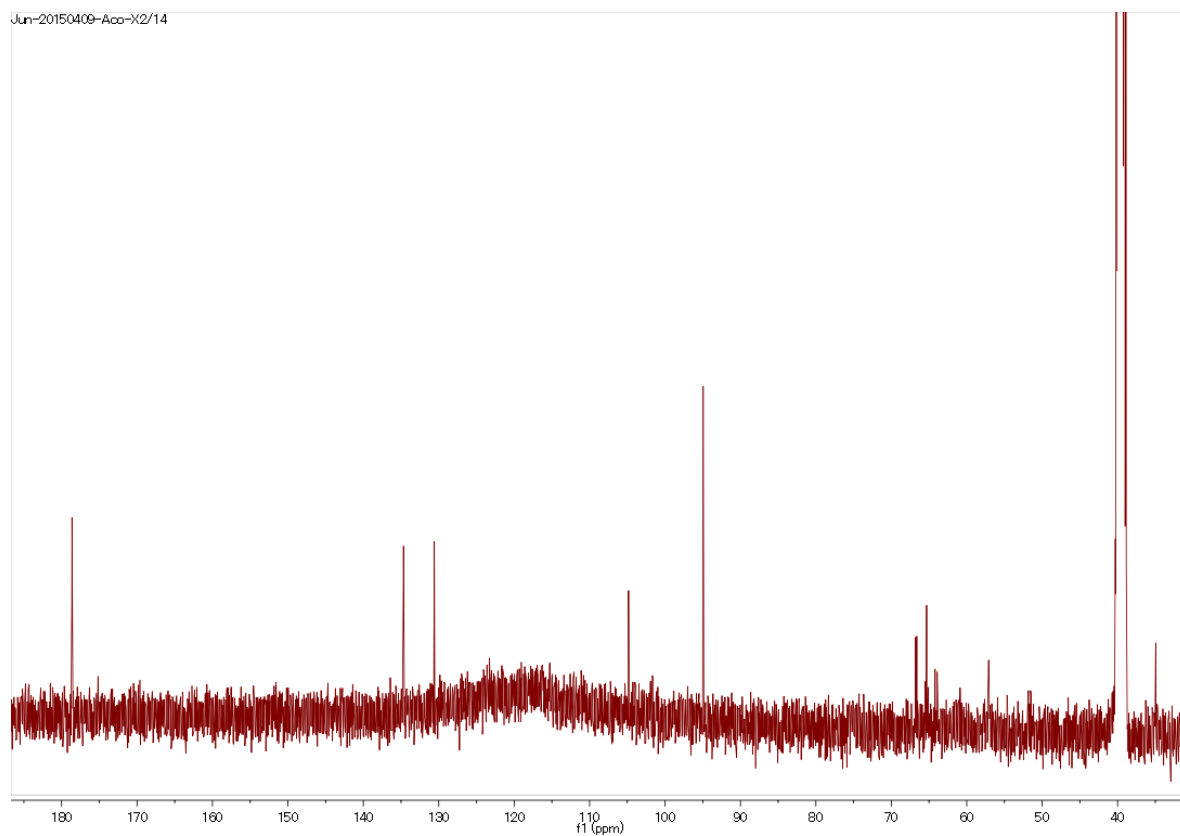

Figure S25.  $^{13}\text{C}$  NMR spectrum (DMSO- $d_6$ , 100 MHz)

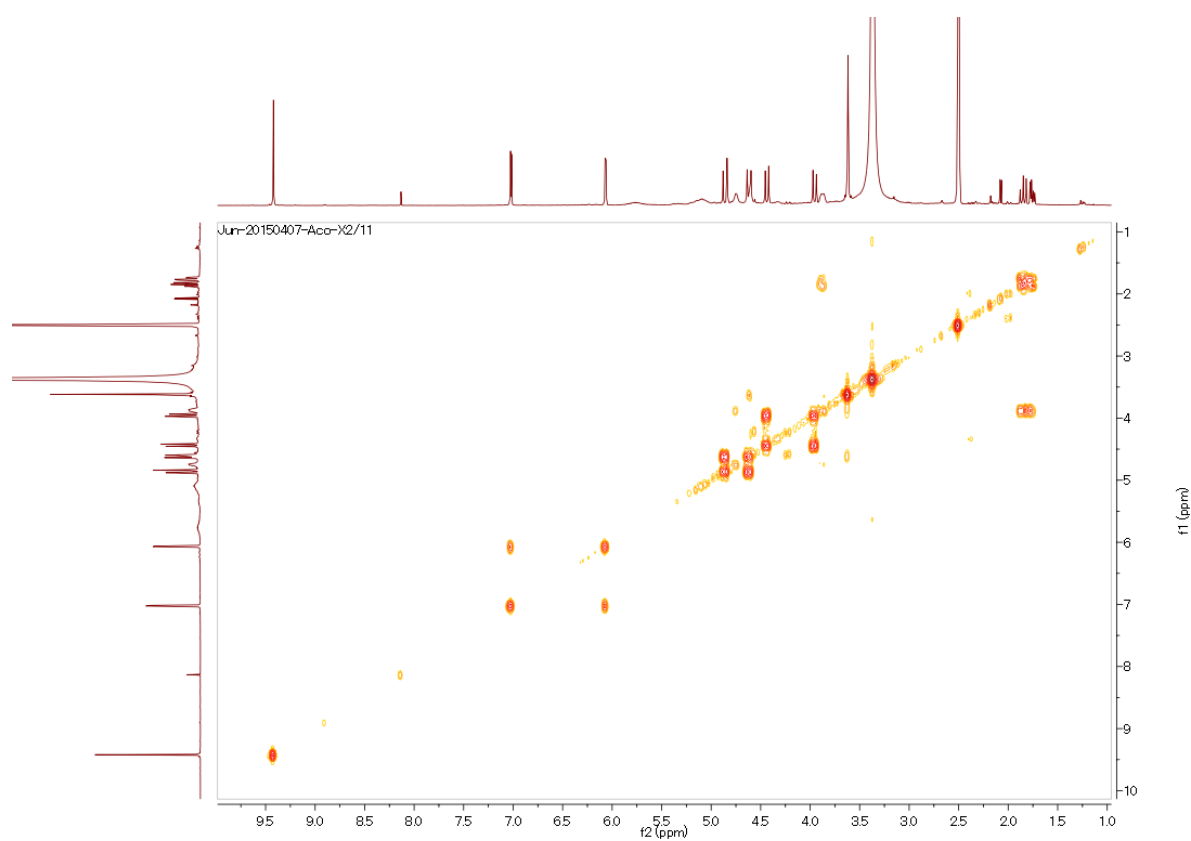

Figure S26. COSY correlations

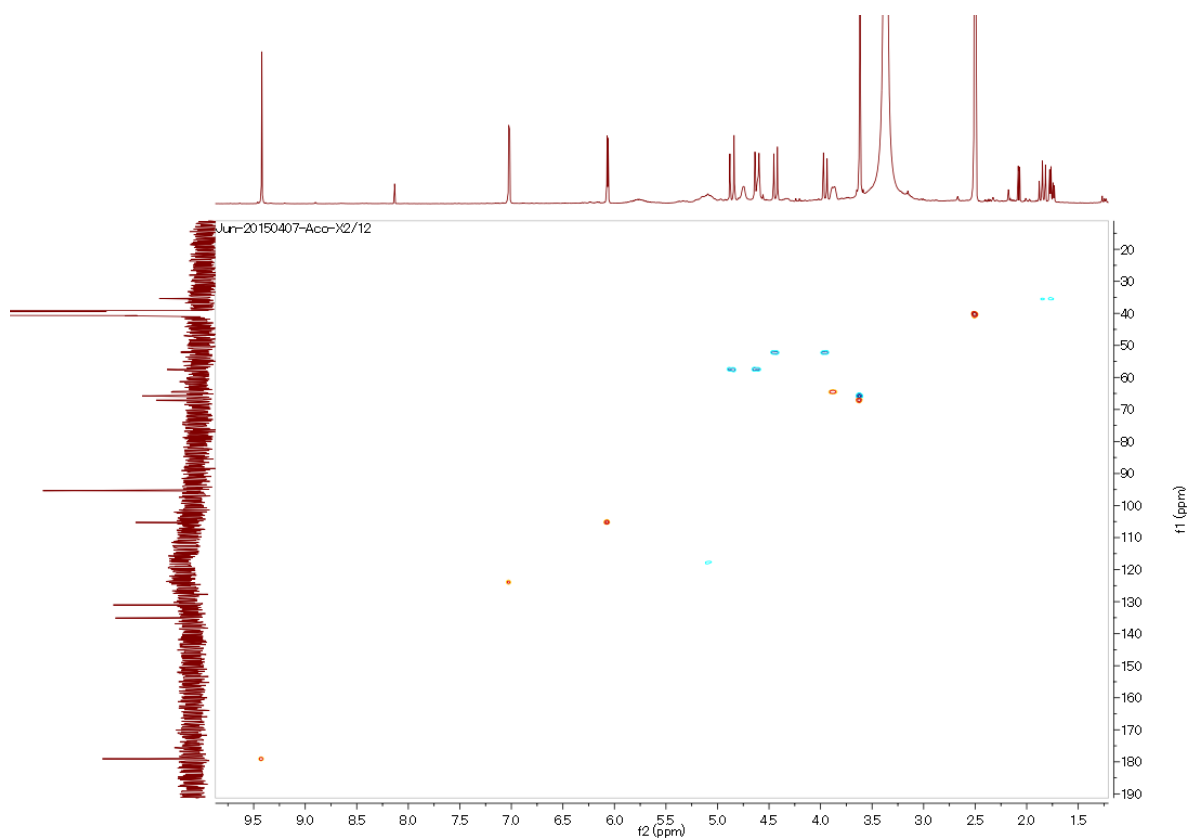

Figure S27. HSQC correlations

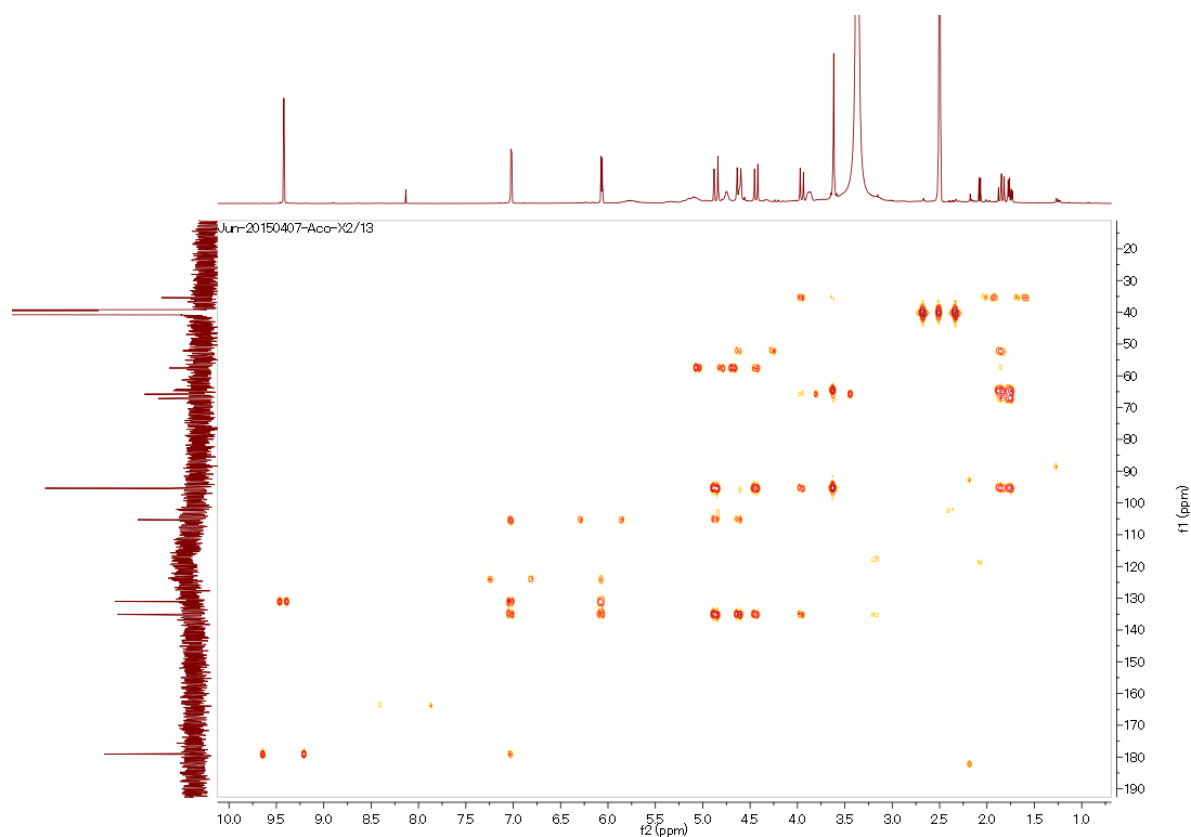

Figure S28. HMBC correlations

**5-hydroxymethyl-1-[(5-hydroxymethyl-2-furanyl)methyl]-1H-pyrrole-2-carbaldehyde (5)**

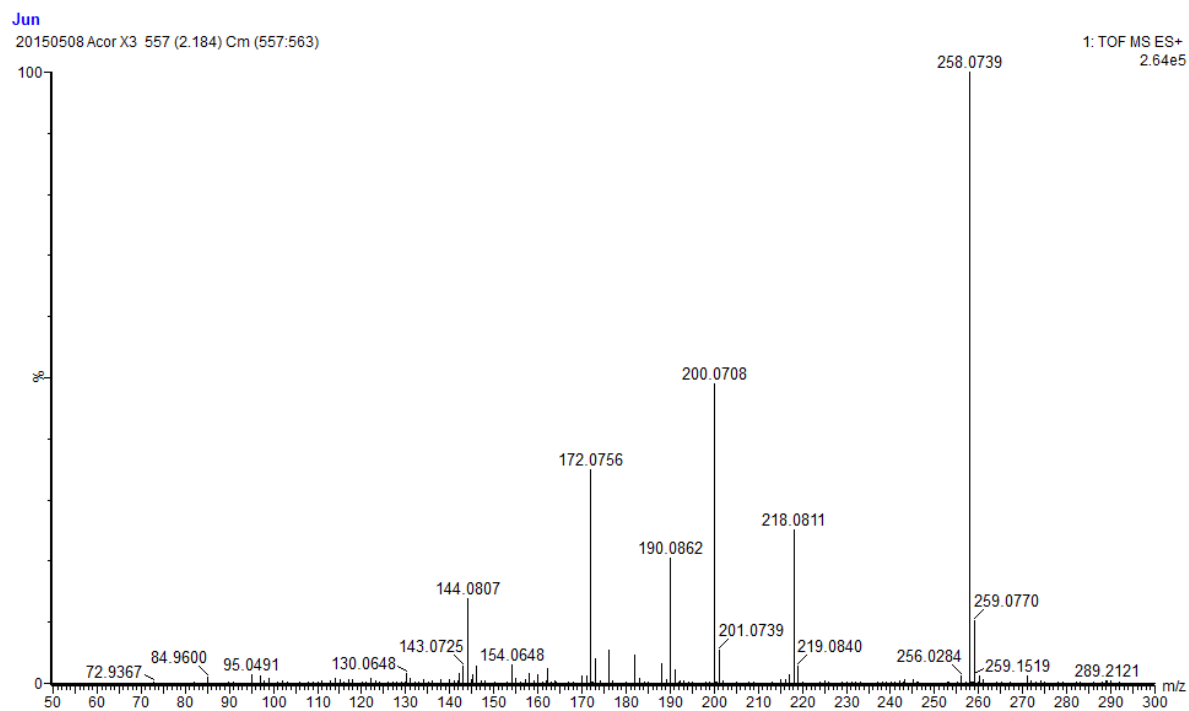

Figure S29. HRESIMS (positive) spectrum

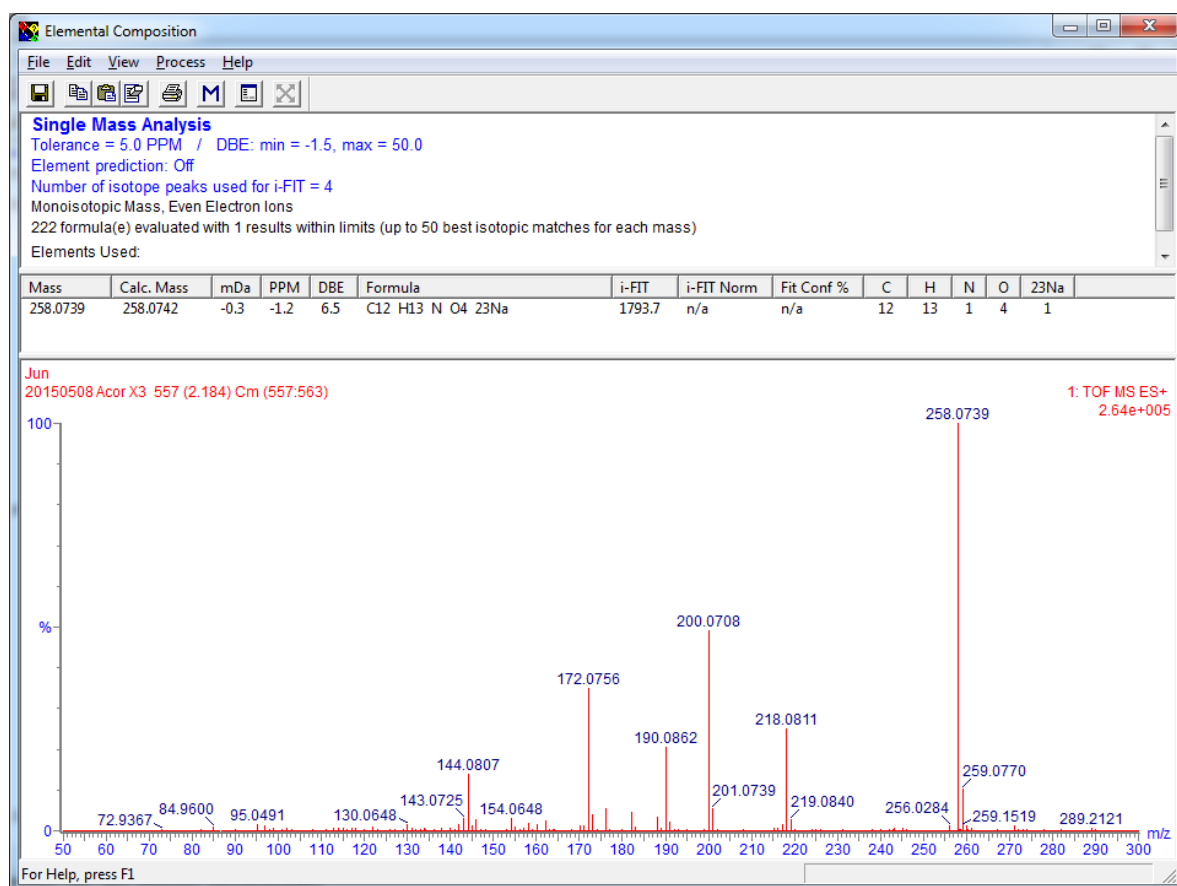

Figure S30. Elemental composition report of the precursor ion

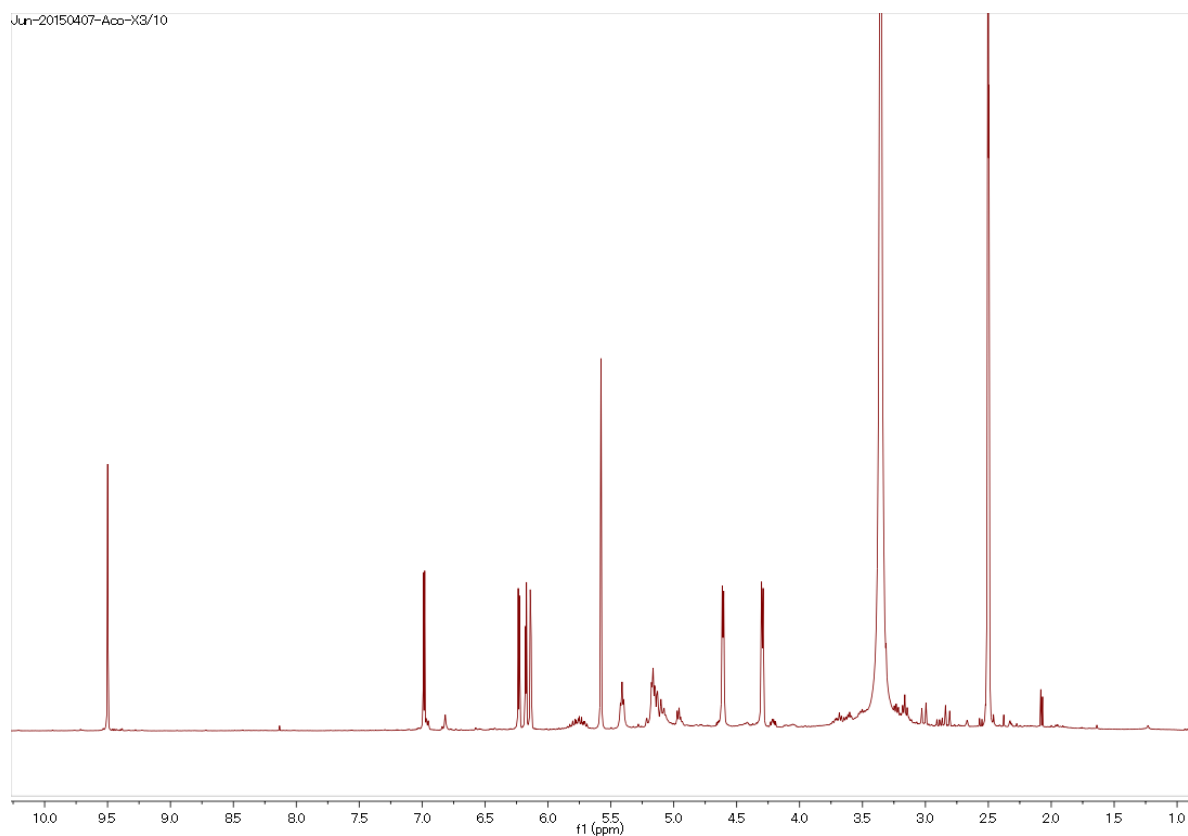

Figure S31.  $^1\text{H}$  NMR spectrum (DMSO- $d_6$ , 400 MHz)

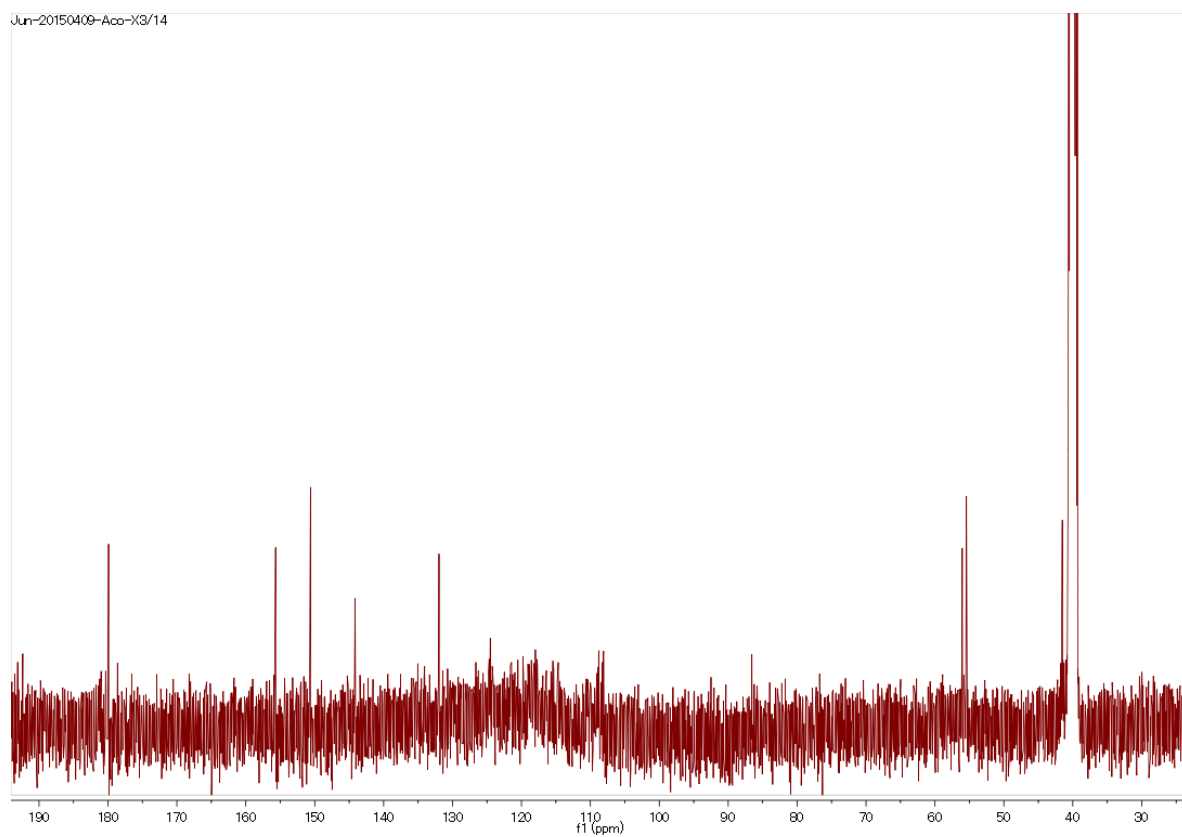

Figure S32.  $^{13}\text{C}$  NMR spectrum (DMSO- $d_6$ , 100 MHz)

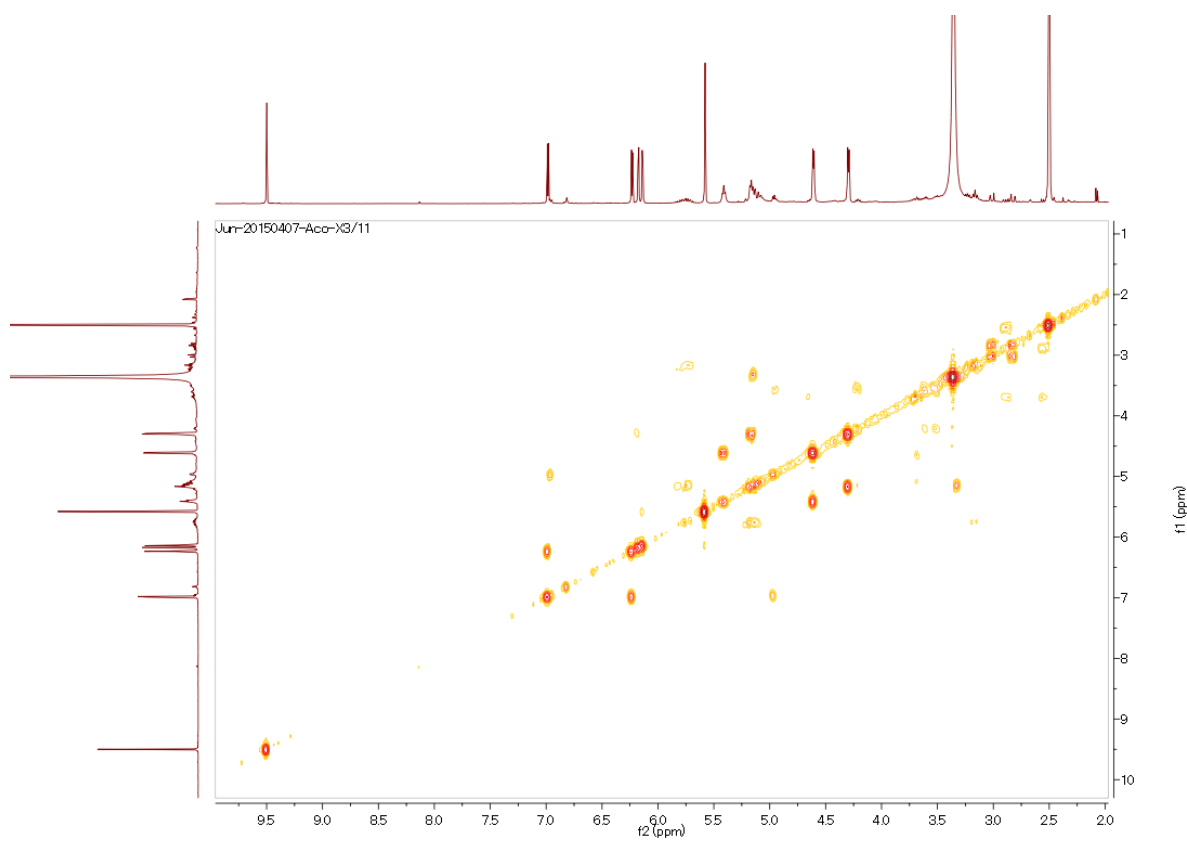

Figure S33. COSY correlations

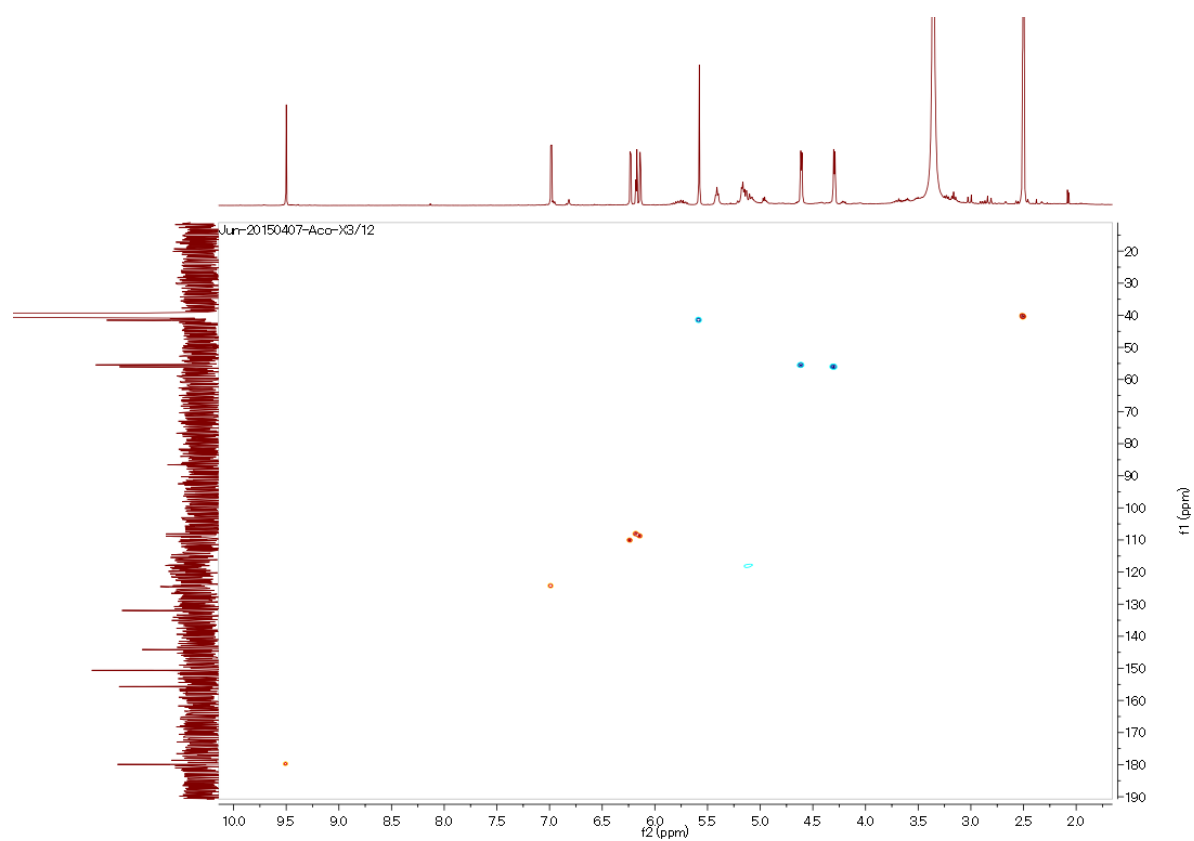

Figure S34. HSQC correlations

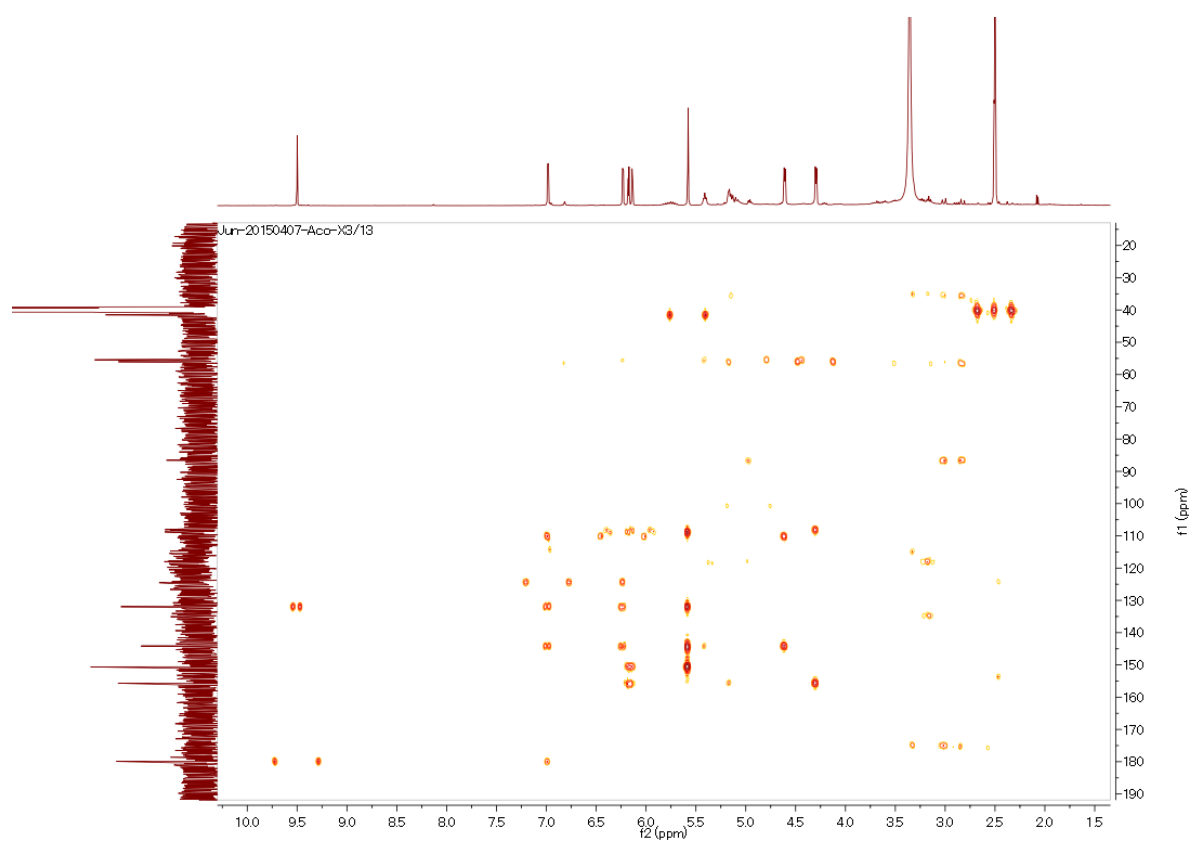

Figure S35. HMBC correlations



### 3-(allylthio)-2-(2-formyl-5-hydroxymethyl-1*H*-pyrrol-1-yl)propanoic acid (**6**)

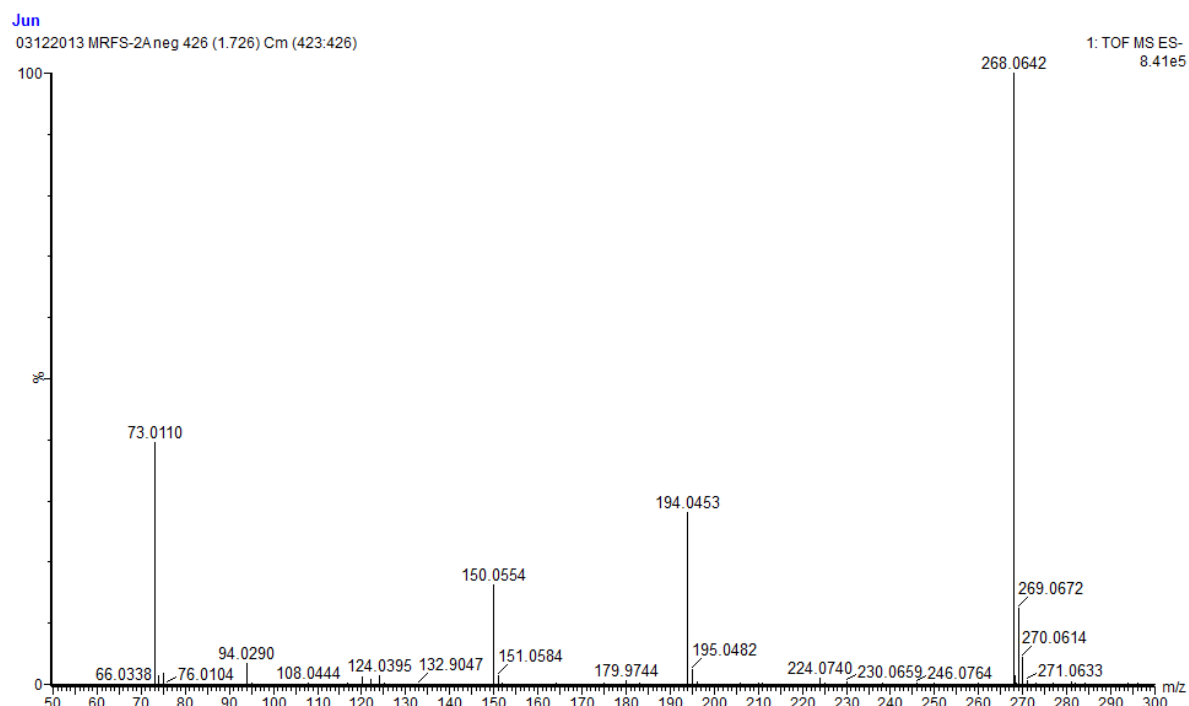

Figure S36. HRESIMS (positive) spectrum

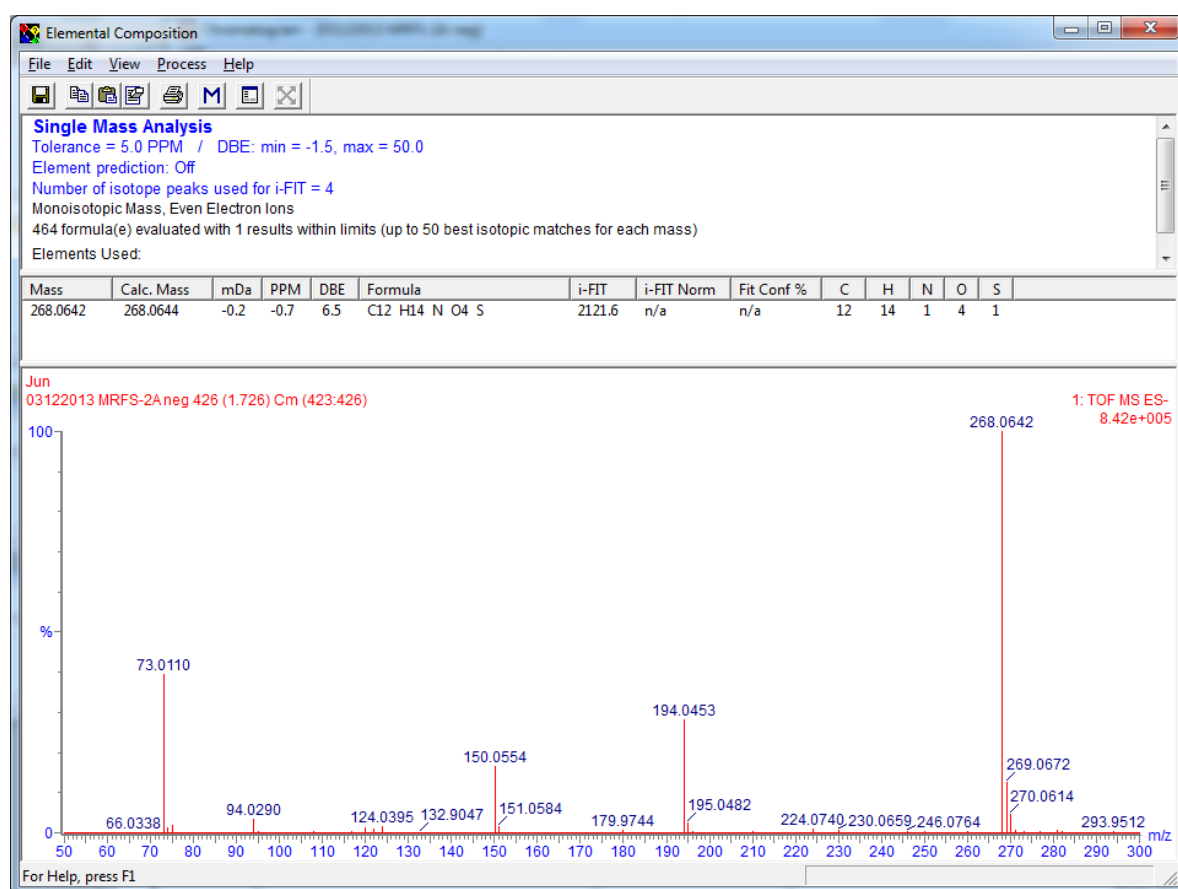

Figure S37. Elemental composition report of the precursor ion

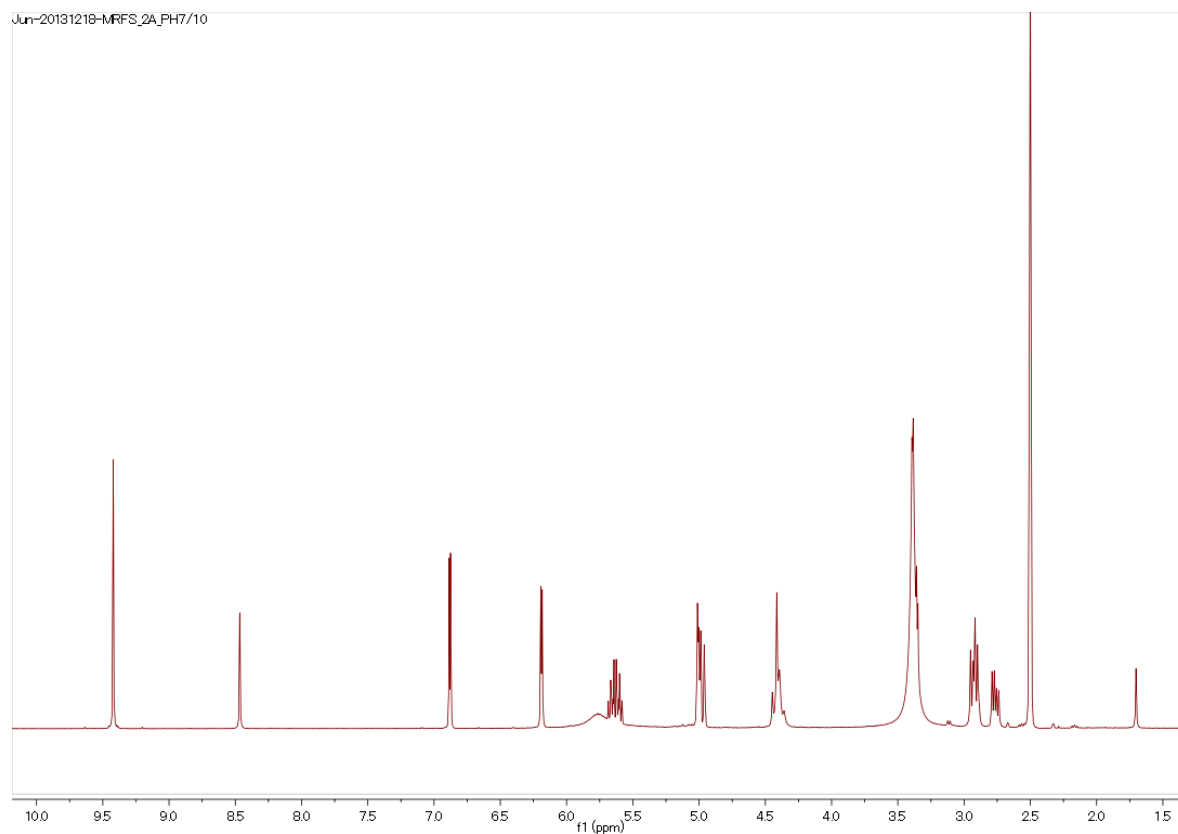

Figure S38.  $^1\text{H}$  NMR spectrum (DMSO- $d_6$ , 400 MHz)

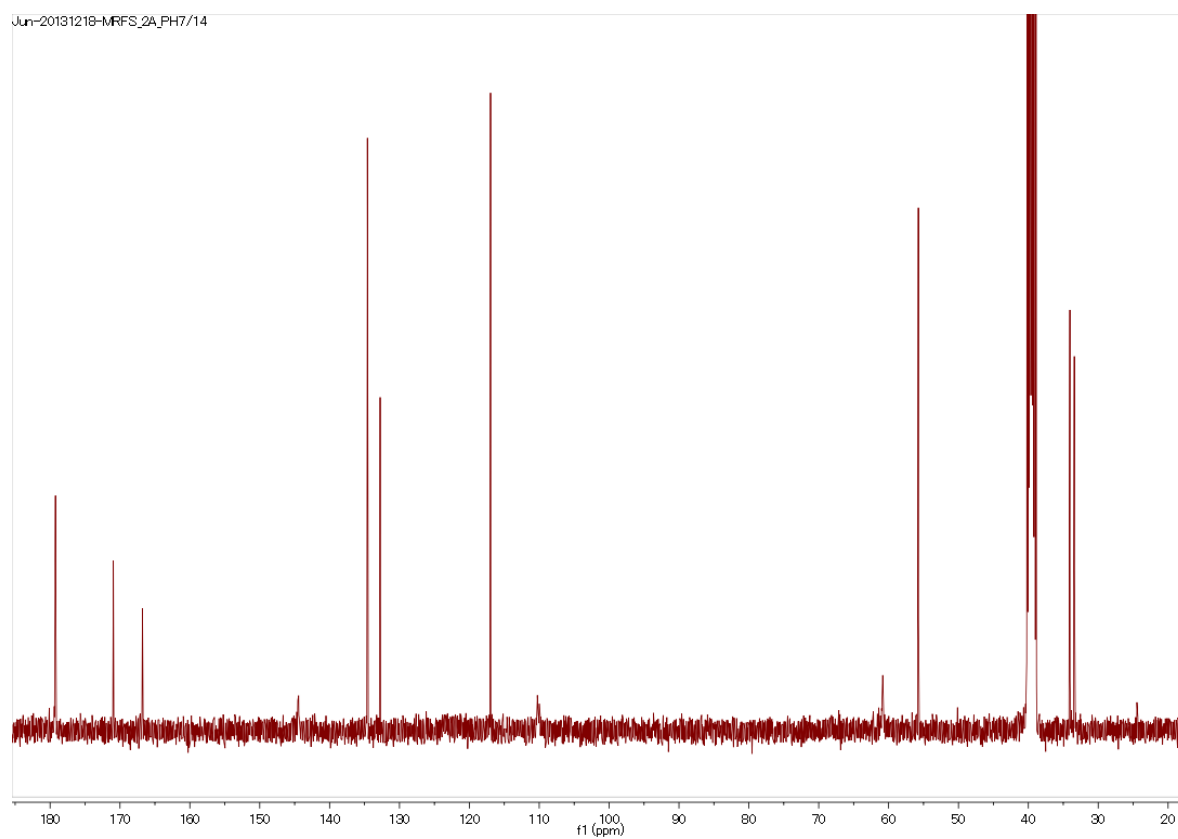

Figure S39.  $^{13}\text{C}$  NMR spectrum (DMSO- $d_6$ , 100 MHz)

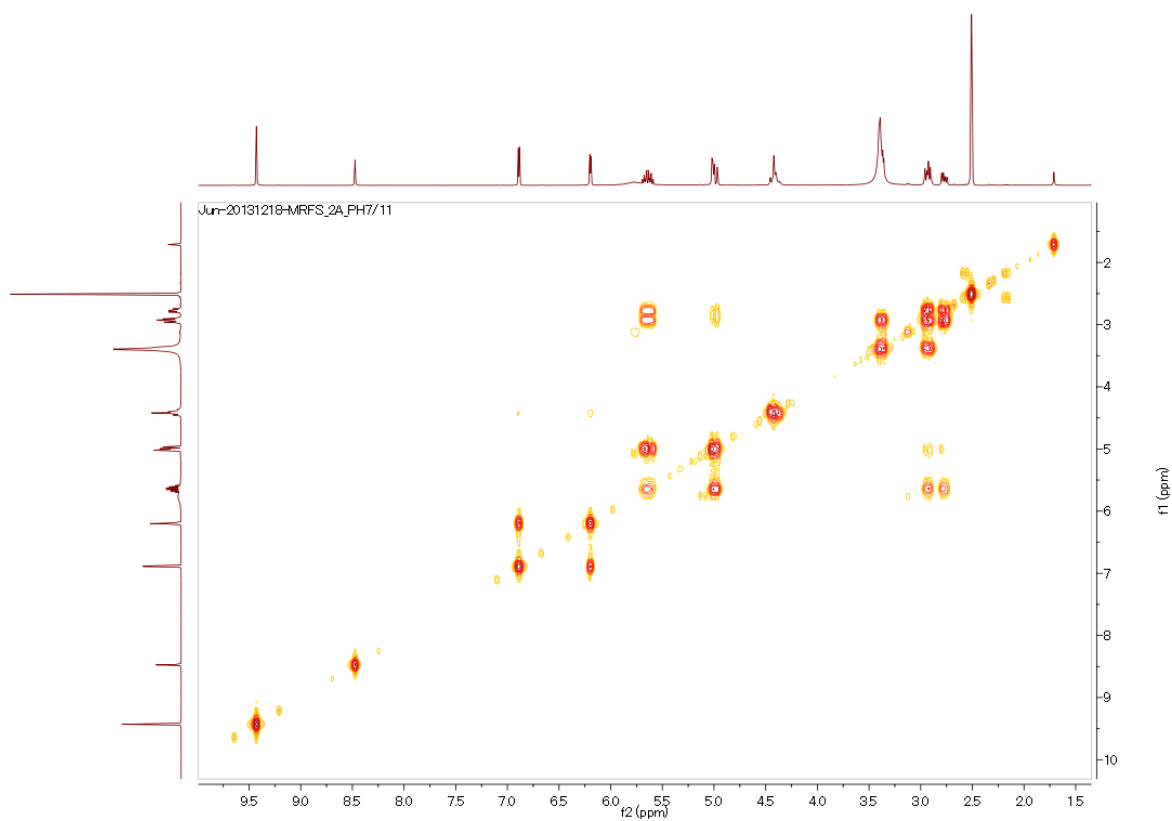

Figure S40. COSY correlations

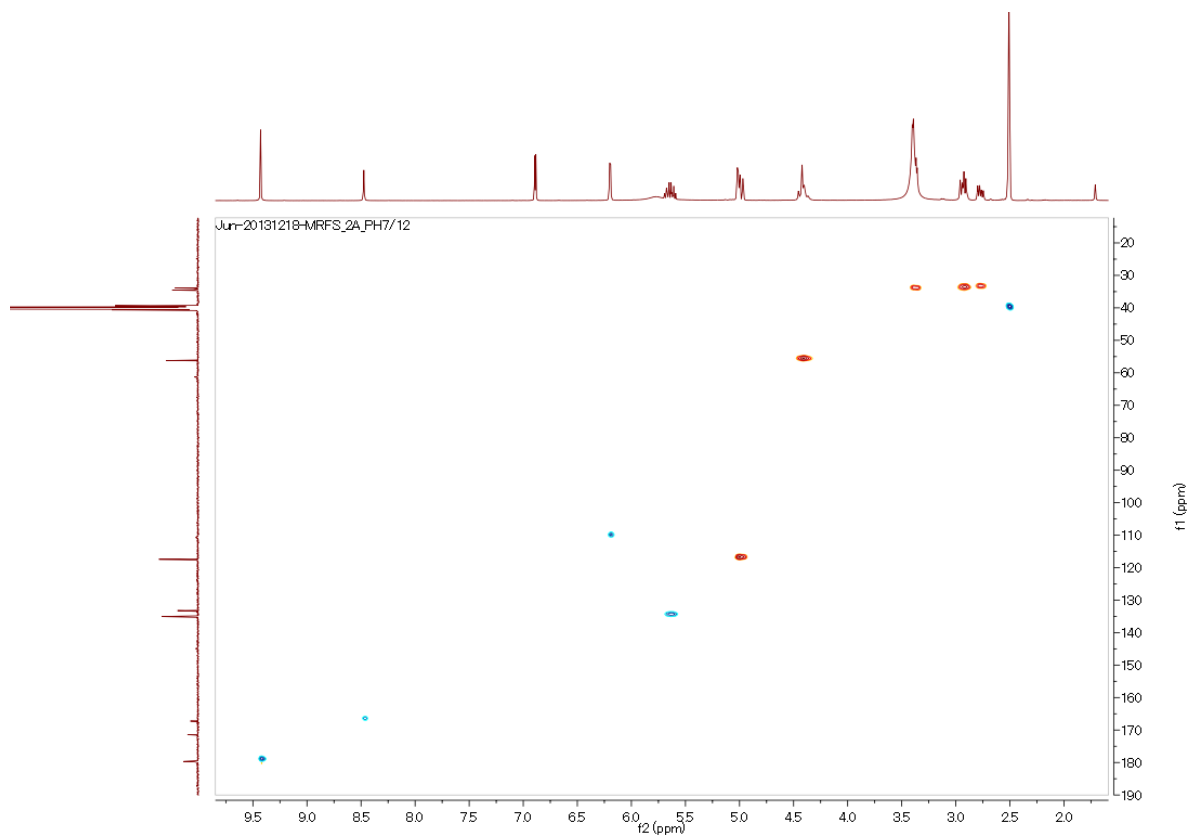

Figure S41. HSQC correlations

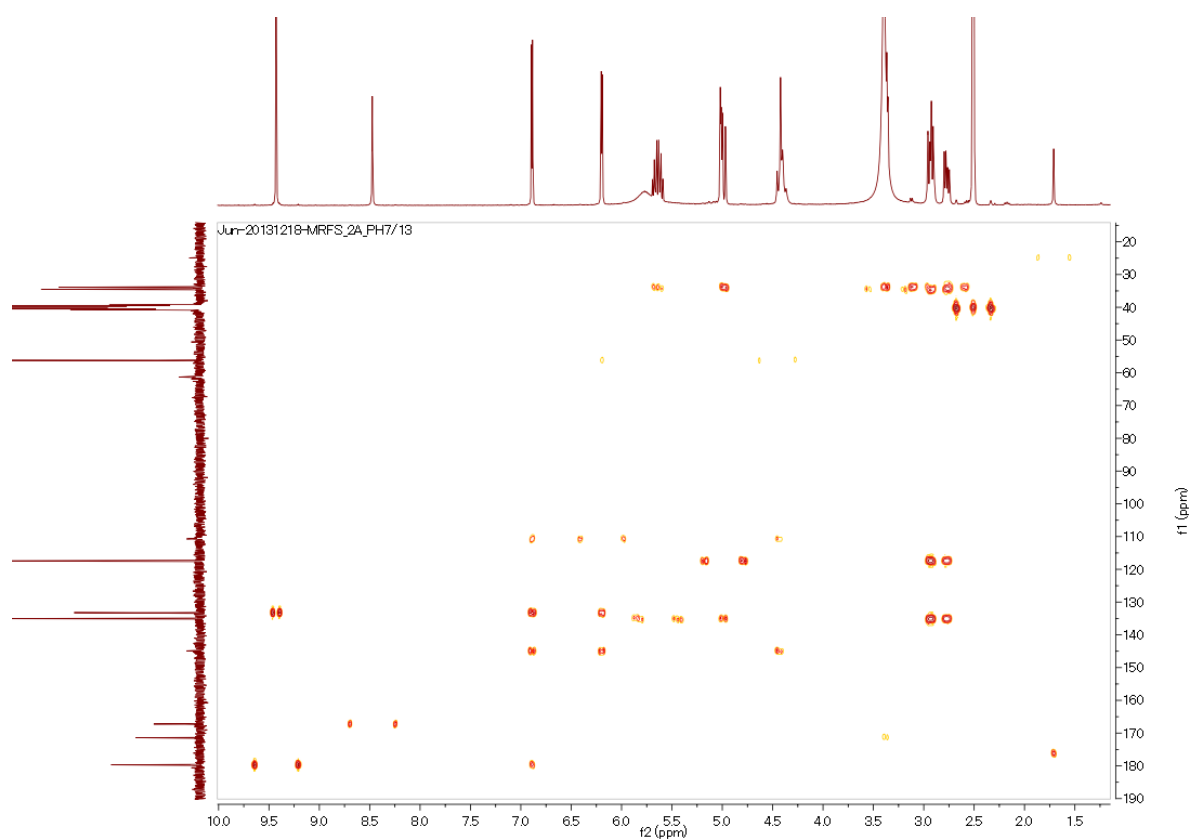

Figure S42. HMBC correlations

(4S)-4-allylthiomethyl-3,4-dihydro-3-oxo-1H-pyrrolo[2,1-c][1,4]oxazine-6-carbaldehyde (**7**)

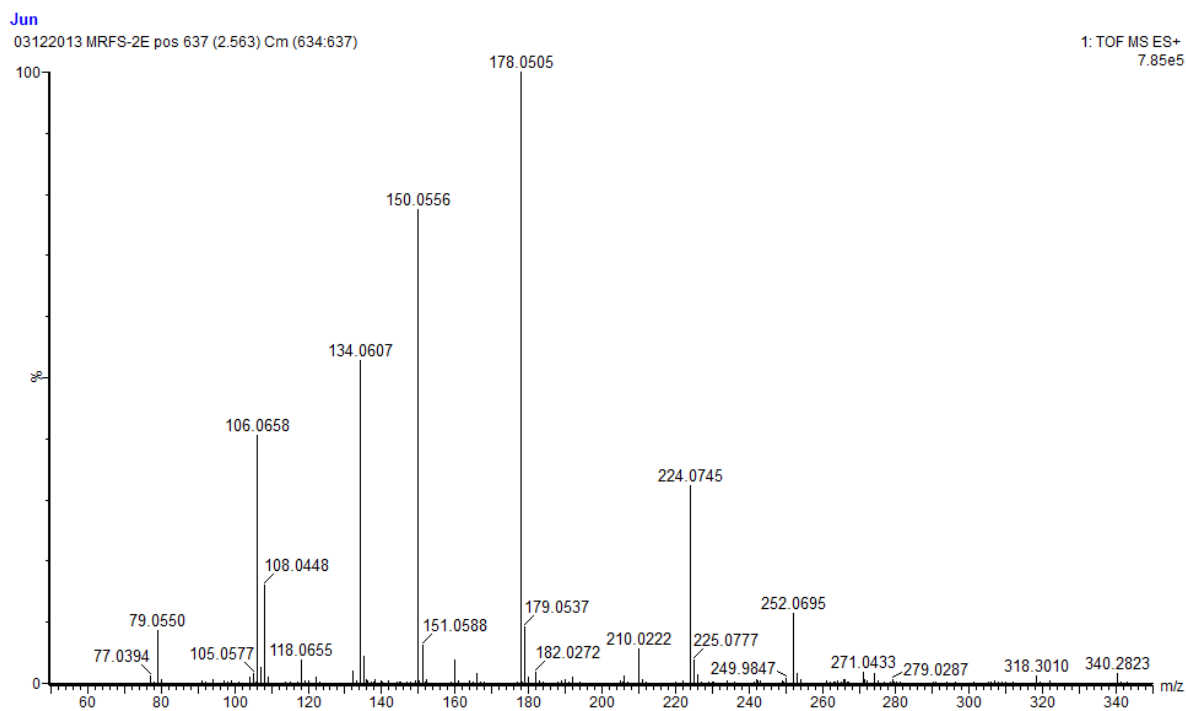

Figure S43. HRESIMS (positive) spectrum

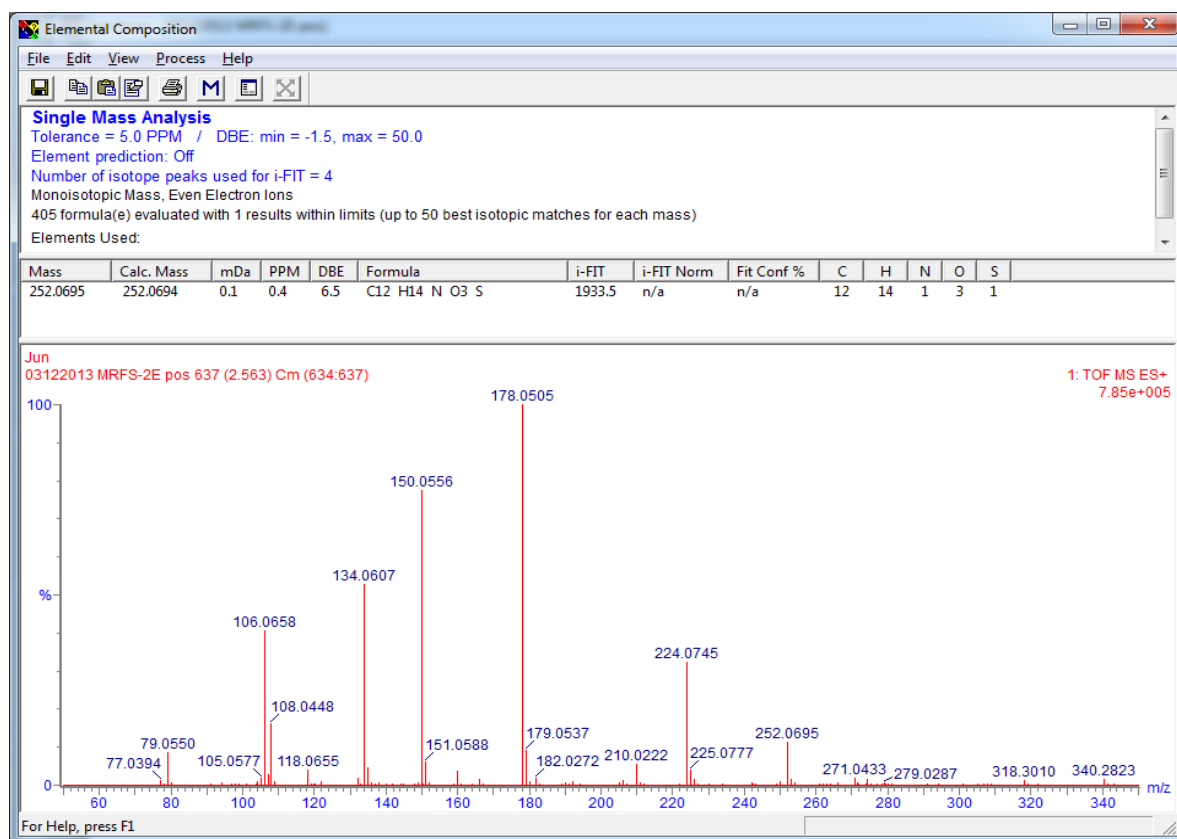

Figure S44. Elemental composition report of the precursor ion

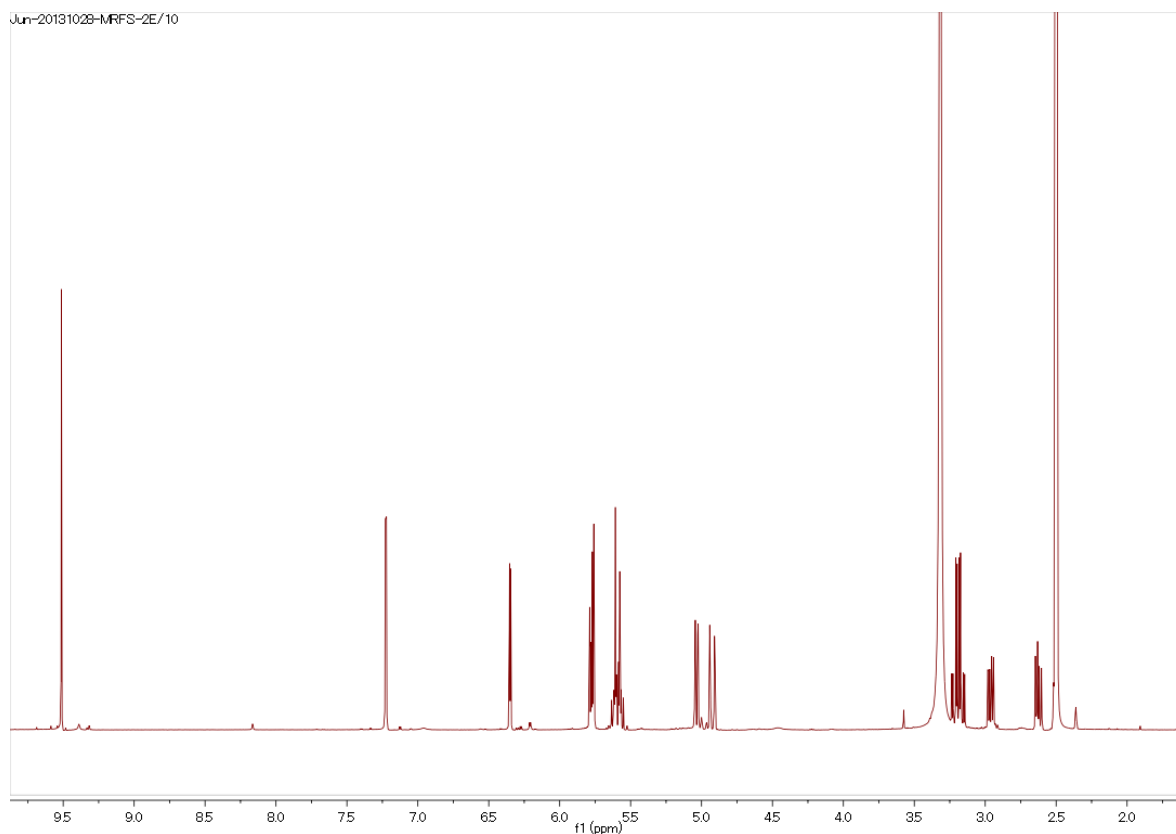

Figure S45.  $^1\text{H}$  NMR spectrum (DMSO- $d_6$ , 500 MHz)

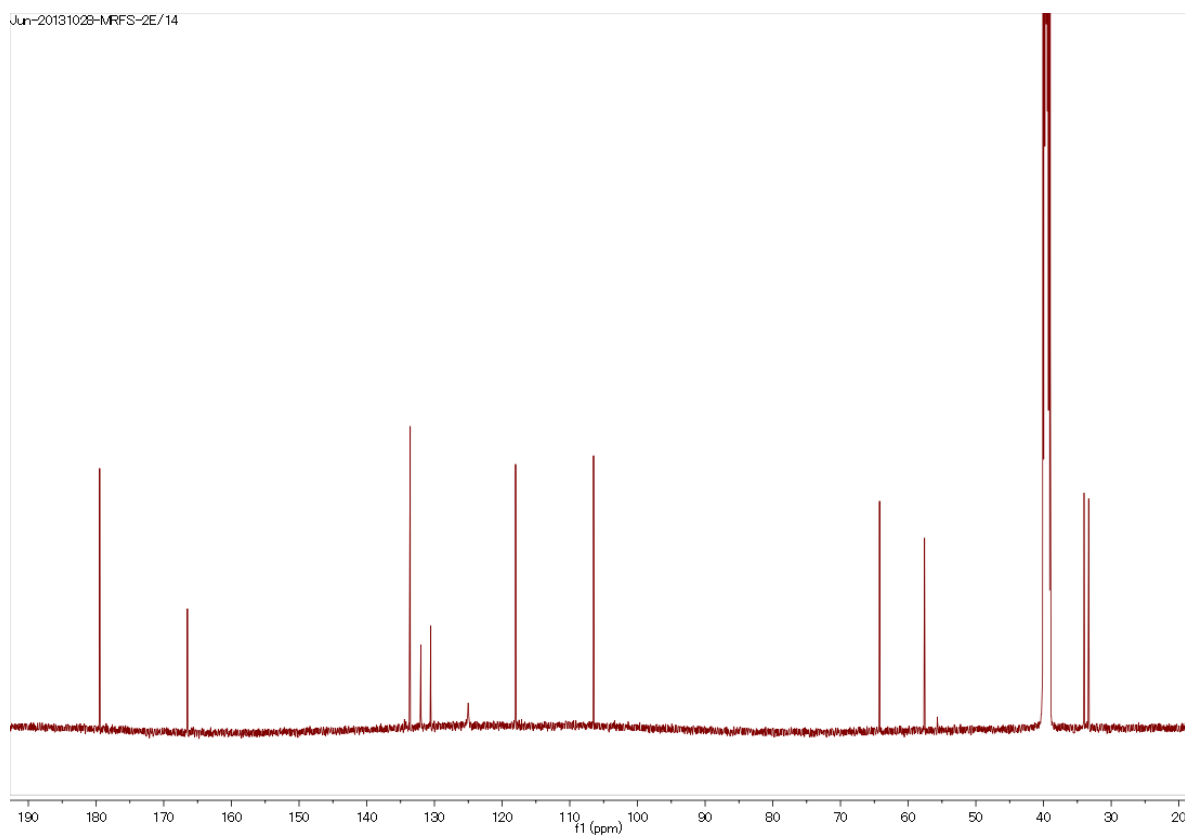

Figure S46.  $^{13}\text{C}$  NMR spectrum (DMSO- $d_6$ , 125 MHz)

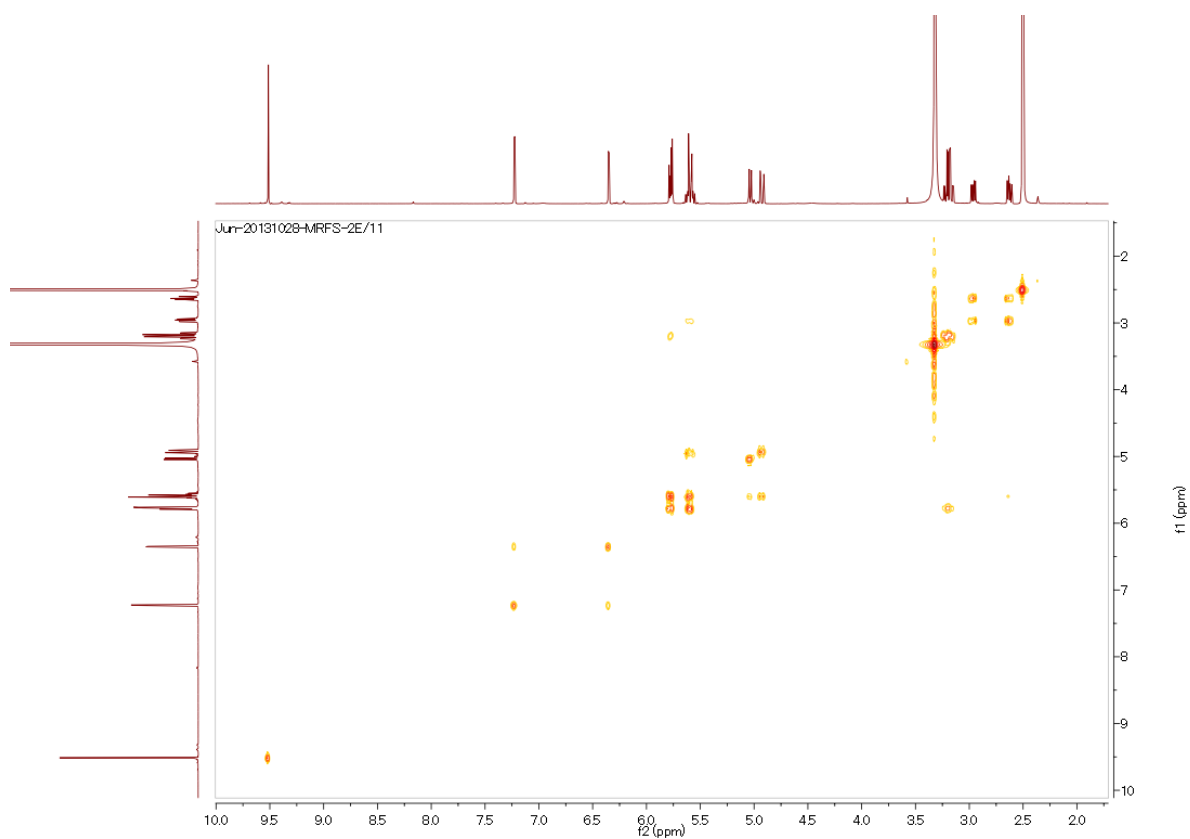

Figure S47. COSY correlations

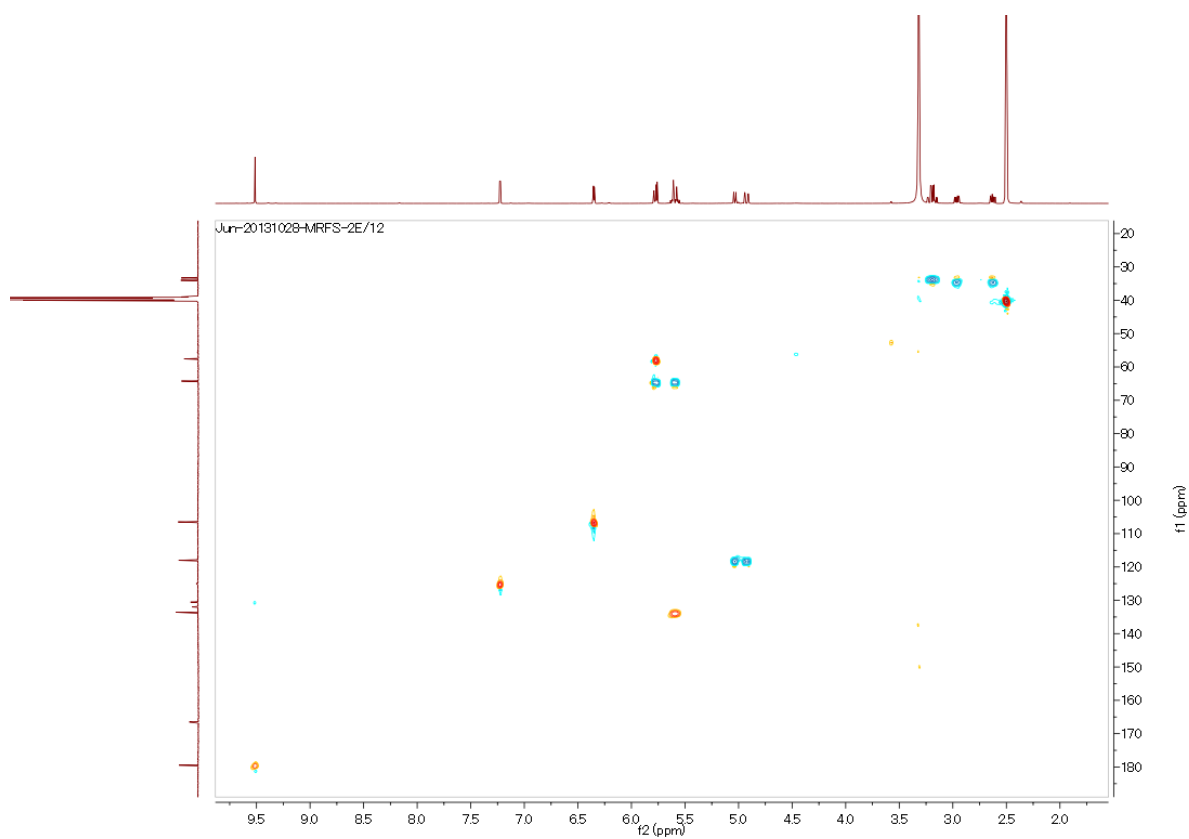

Figure S48. HSQC correlations

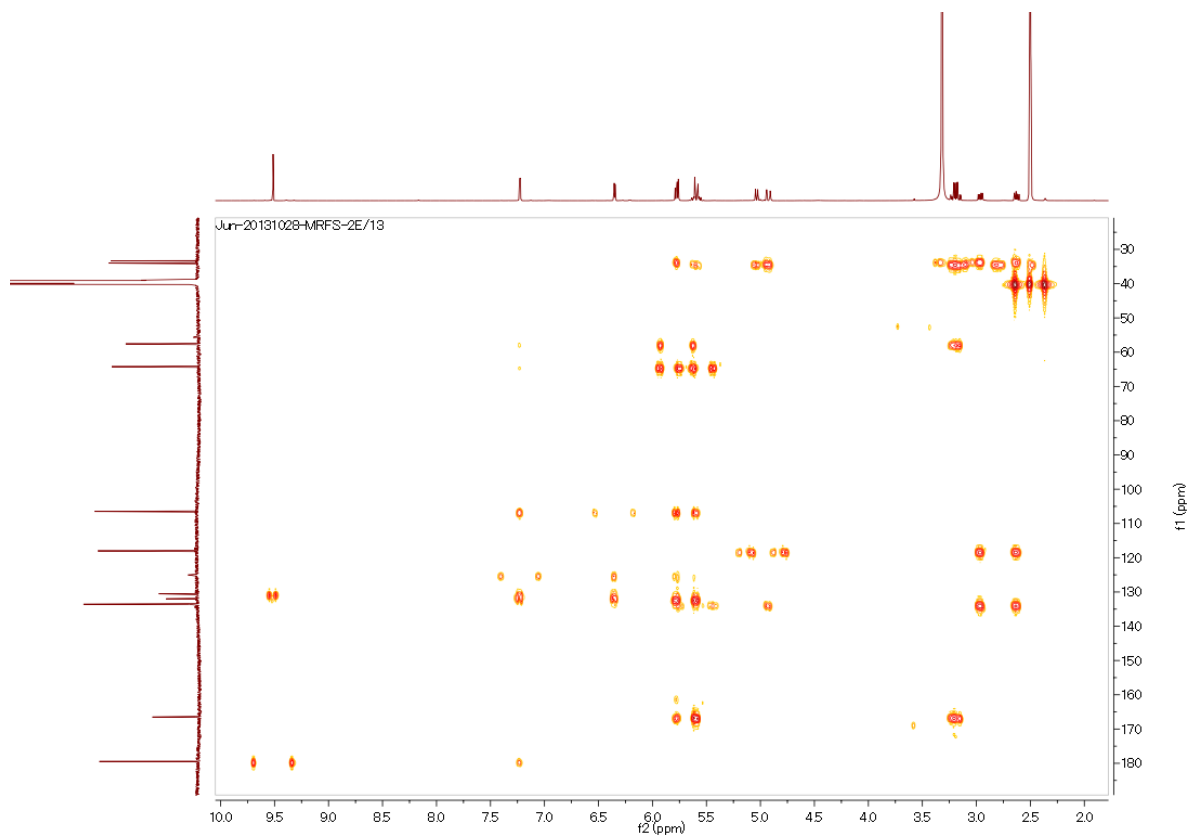

Figure S49. HMBC correlations

(2*R*)-3-(allylthio)-2-((4*R*)-4-(allylthiomethyl)-6-formyl-3-oxo-3,4-dihydropyrrolo[1,2-*a*]-pyrazin-2(1*H*)-yl)propanoic acid (**8**)

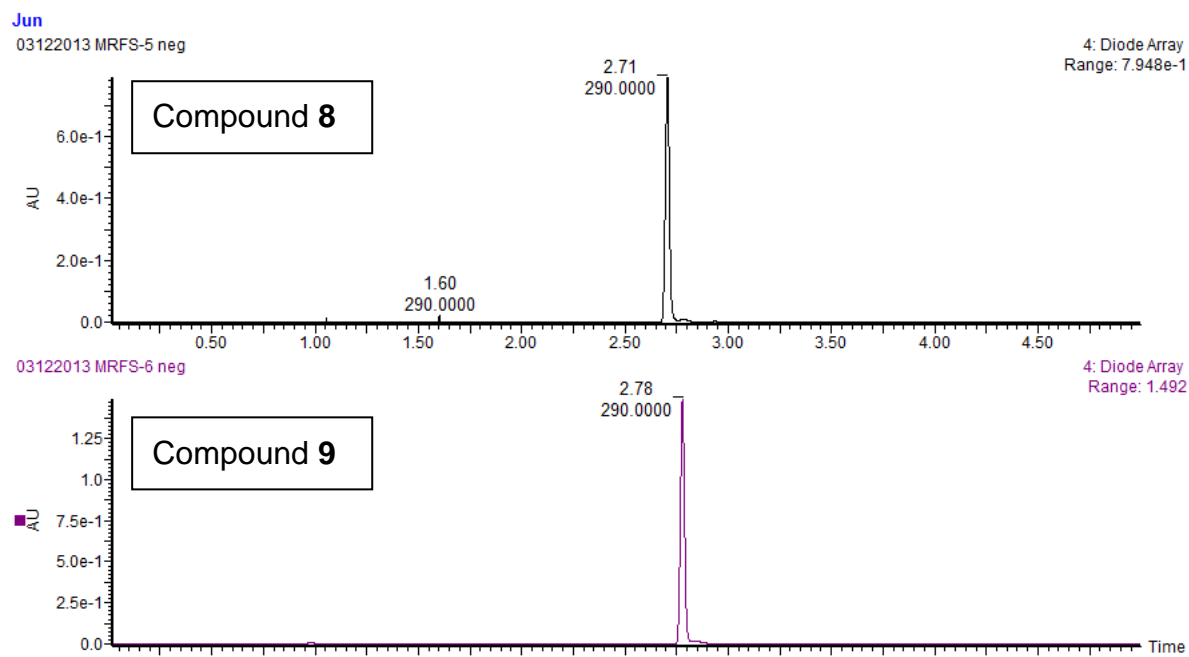

Figure S50. Chromatograms of compounds **8** and **9** recorded by UV detection (290 nm) using UPLC-TOF-MS

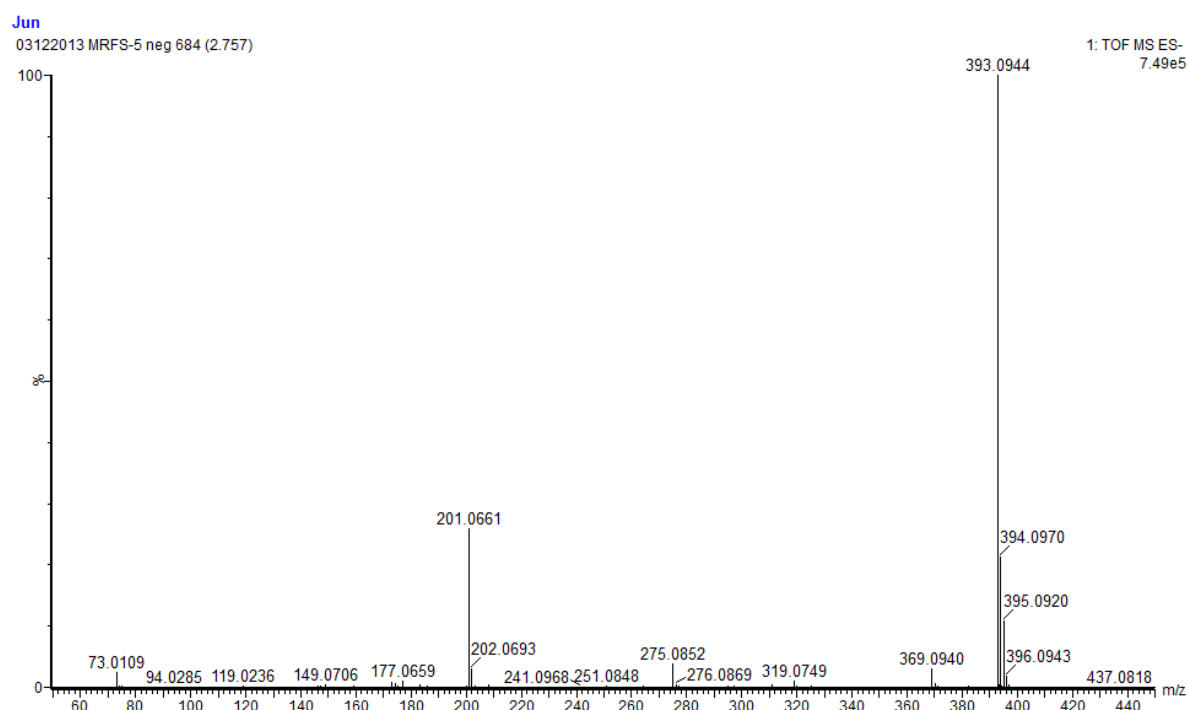

Figure S51. HRESIMS (negative) spectrum



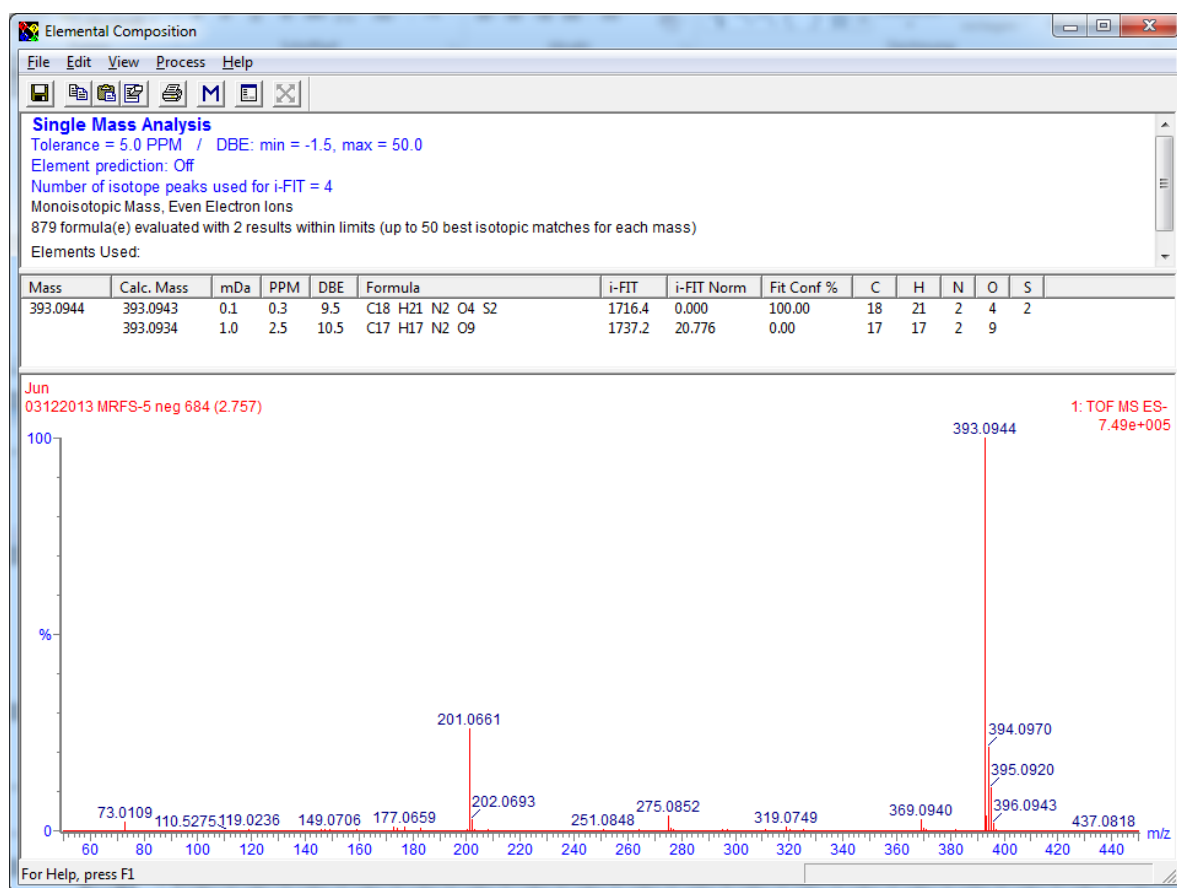

Figure S52. Elemental composition report of the precursor ion

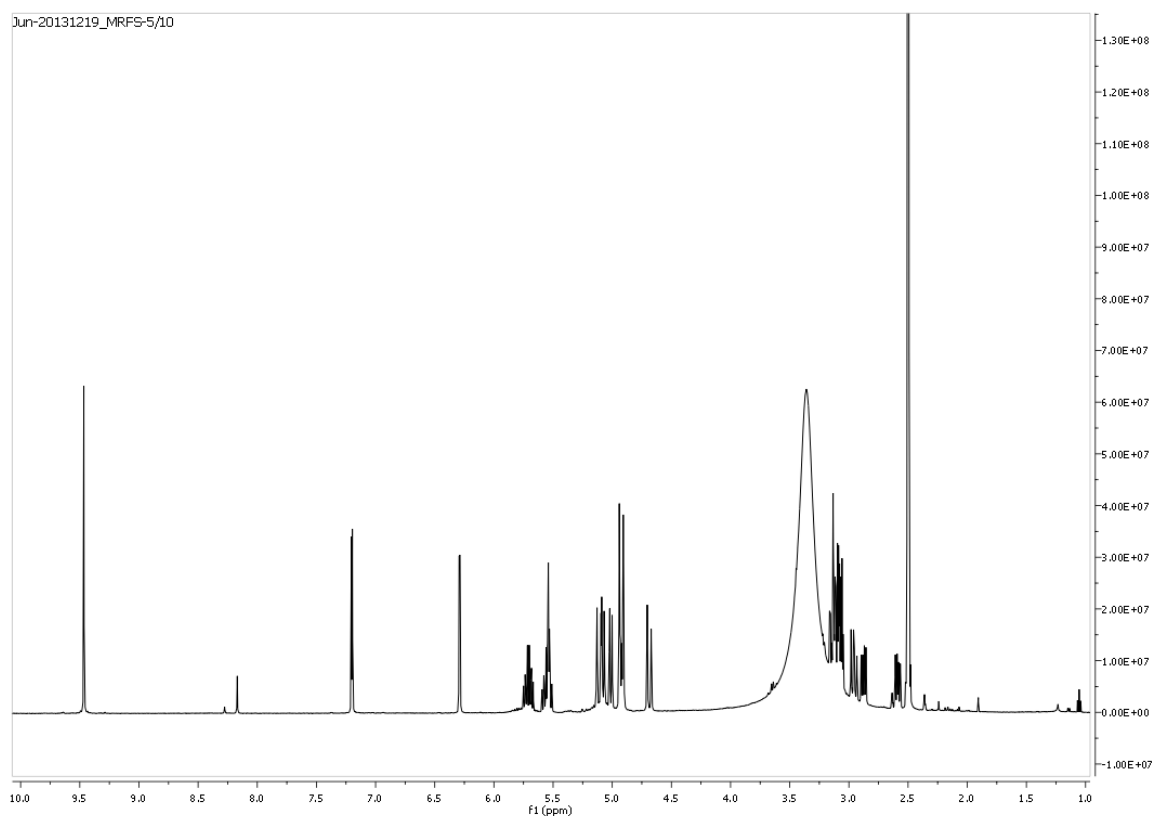

Figure S53.  $^1\text{H}$  NMR spectrum (DMSO- $d_6$ , 500 MHz)

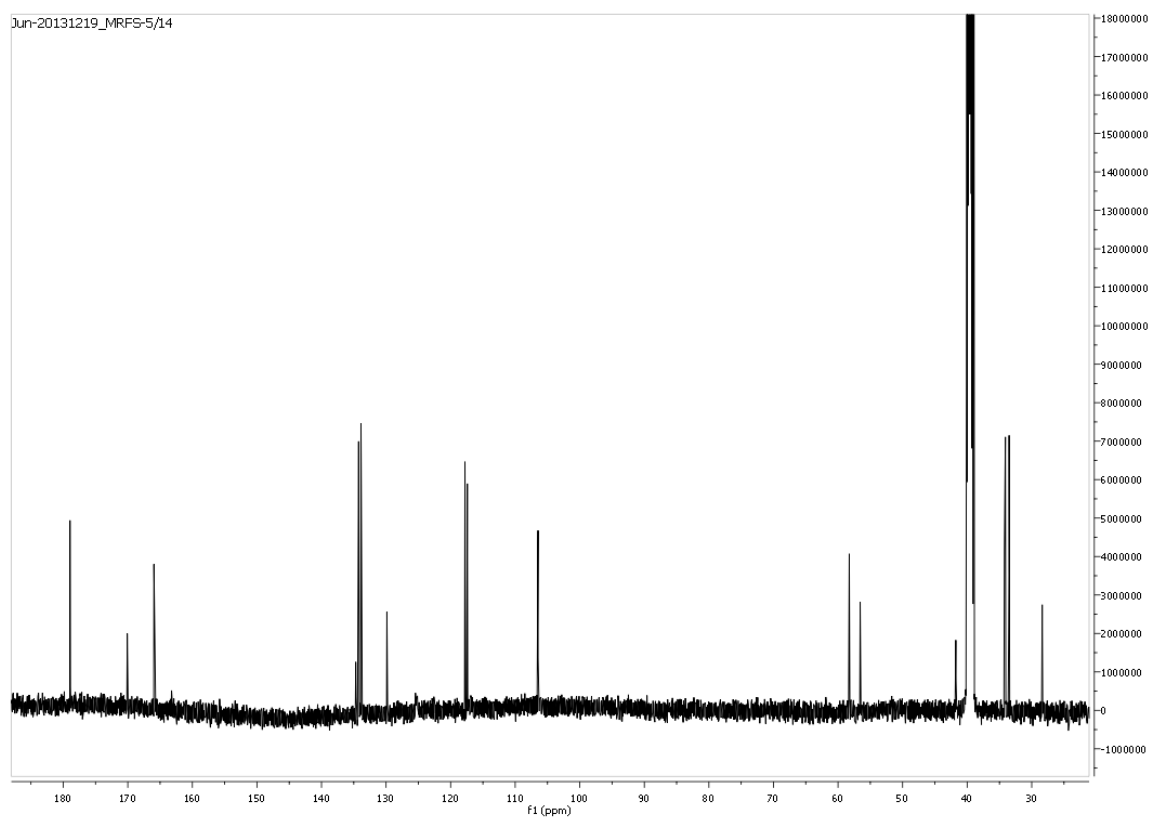

Figure S54.  $^{13}\text{C}$  NMR spectrum (DMSO- $d_6$ , 125 MHz)

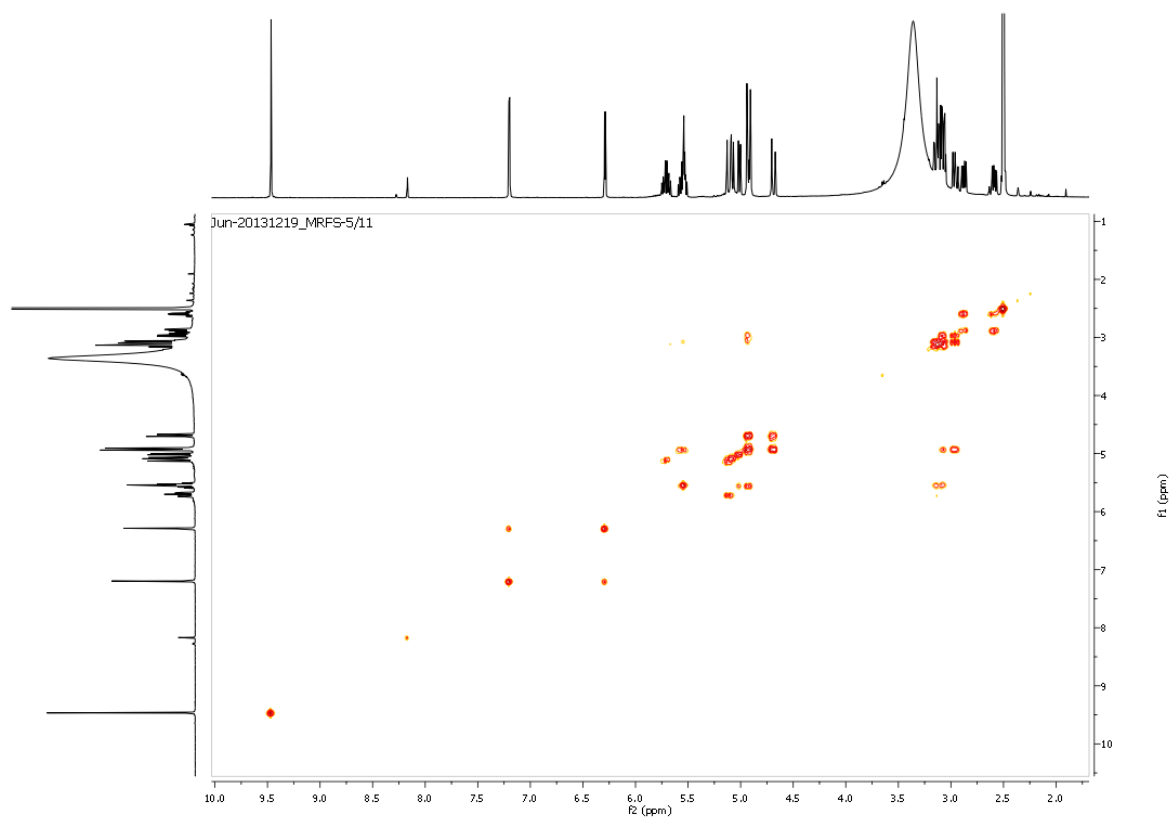

Figure S55. COSY correlations

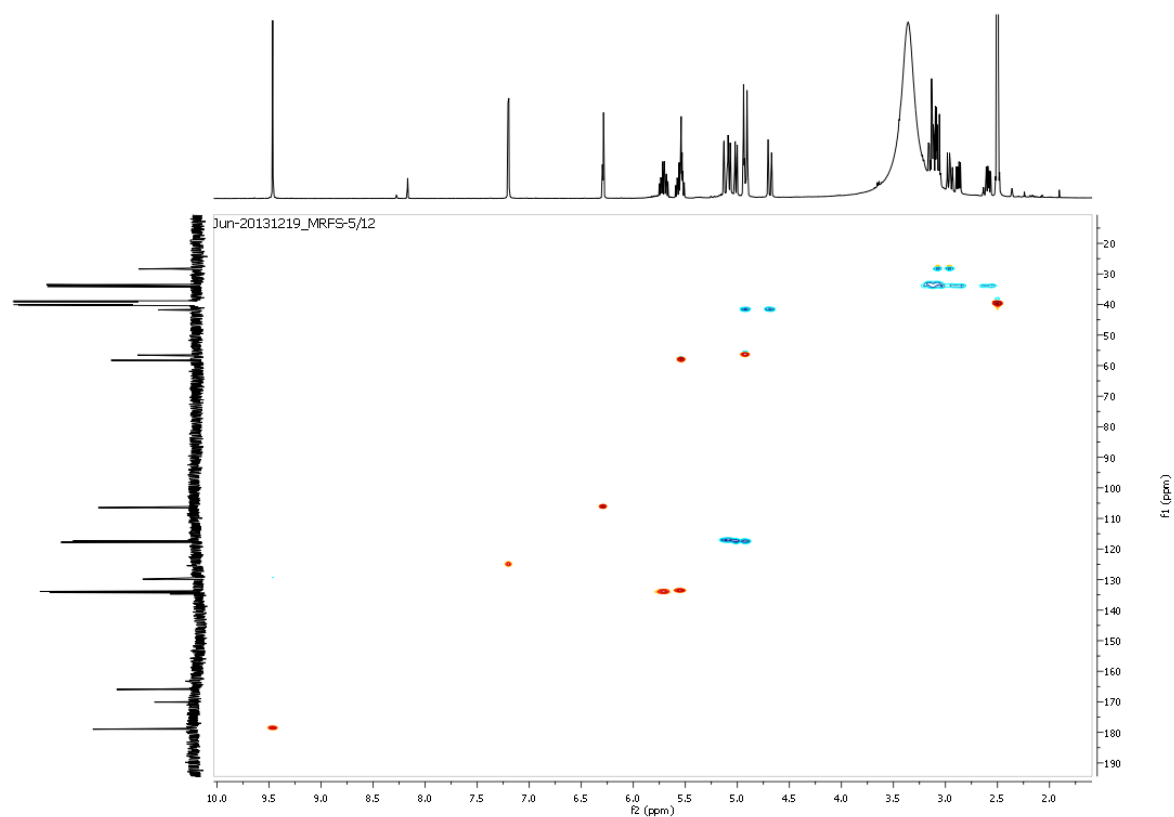

Figure S56. HSQC correlations

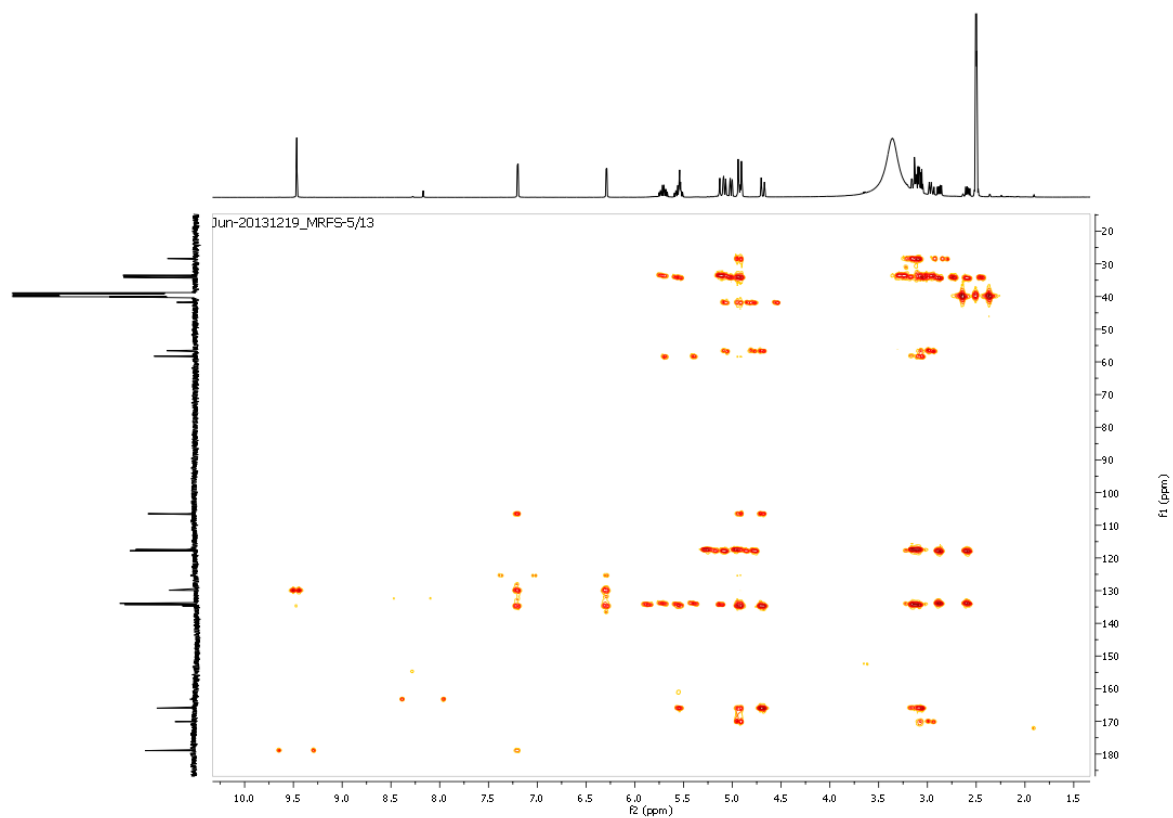

Figure S57. HMBC correlations

(2*R*)-3-(allylthio)-2-((4*S*)-4-(allylthiomethyl)-6-formyl-3-oxo-3,4-dihydropyrrolo[1,2-*a*]-pyrazin-2(1*H*)-yl)propanoic acid (**9**)

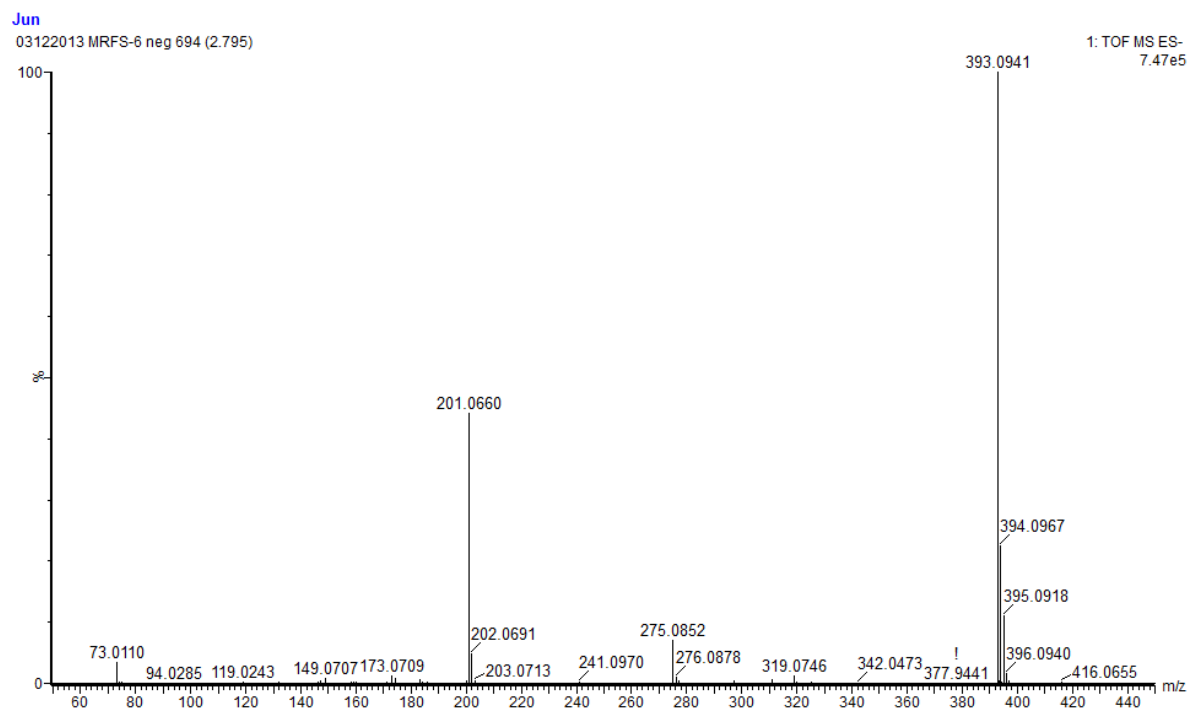

Figure S58. HRESIMS (negative) spectrum

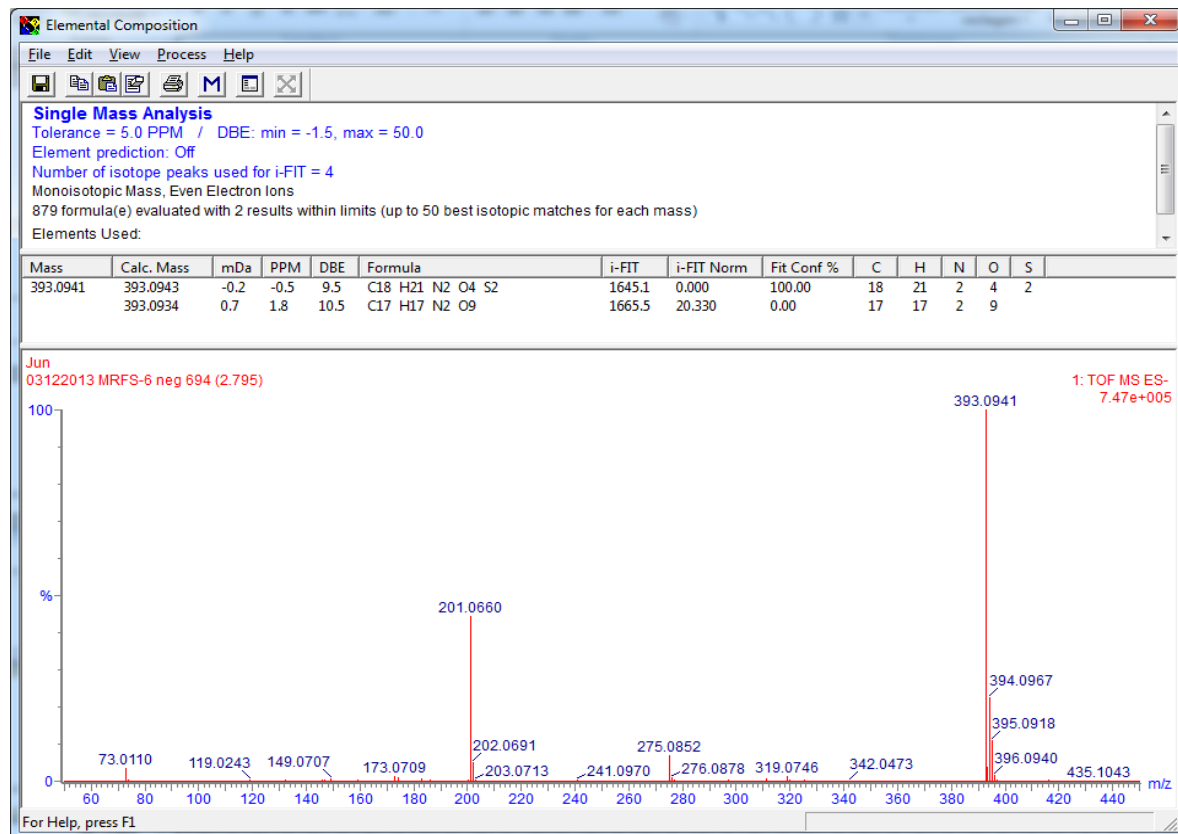

Figure S59. Elemental composition report of the precursor ion

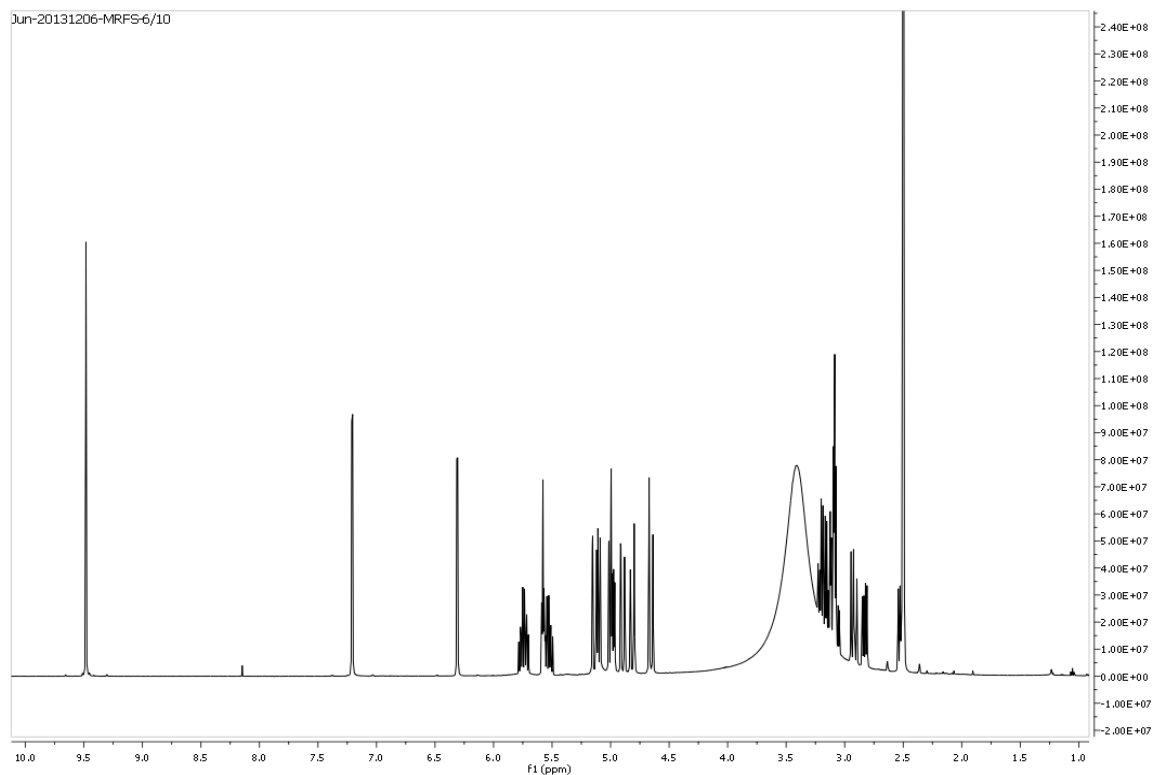

Figure S60.  $^1\text{H}$  NMR spectrum (DMSO- $d_6$ , 500 MHz)

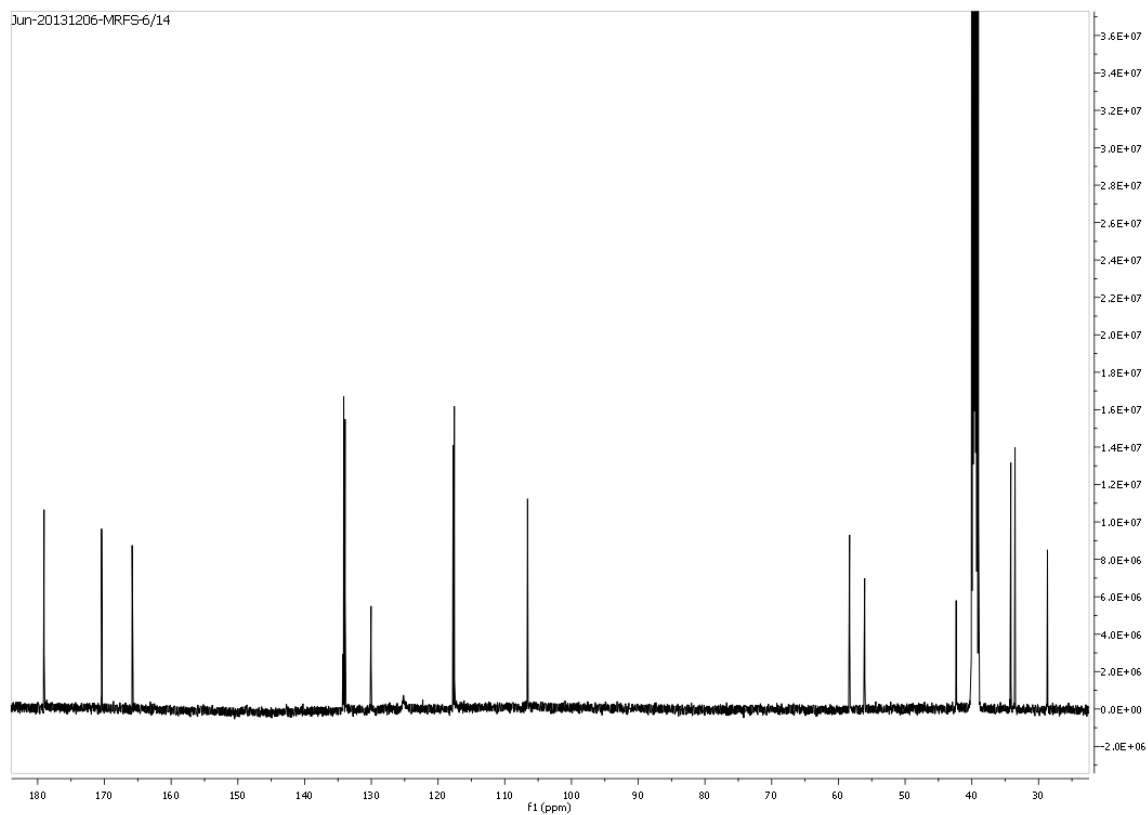

Figure S61.  $^{13}\text{C}$  NMR spectrum (DMSO- $d_6$ , 125 MHz)

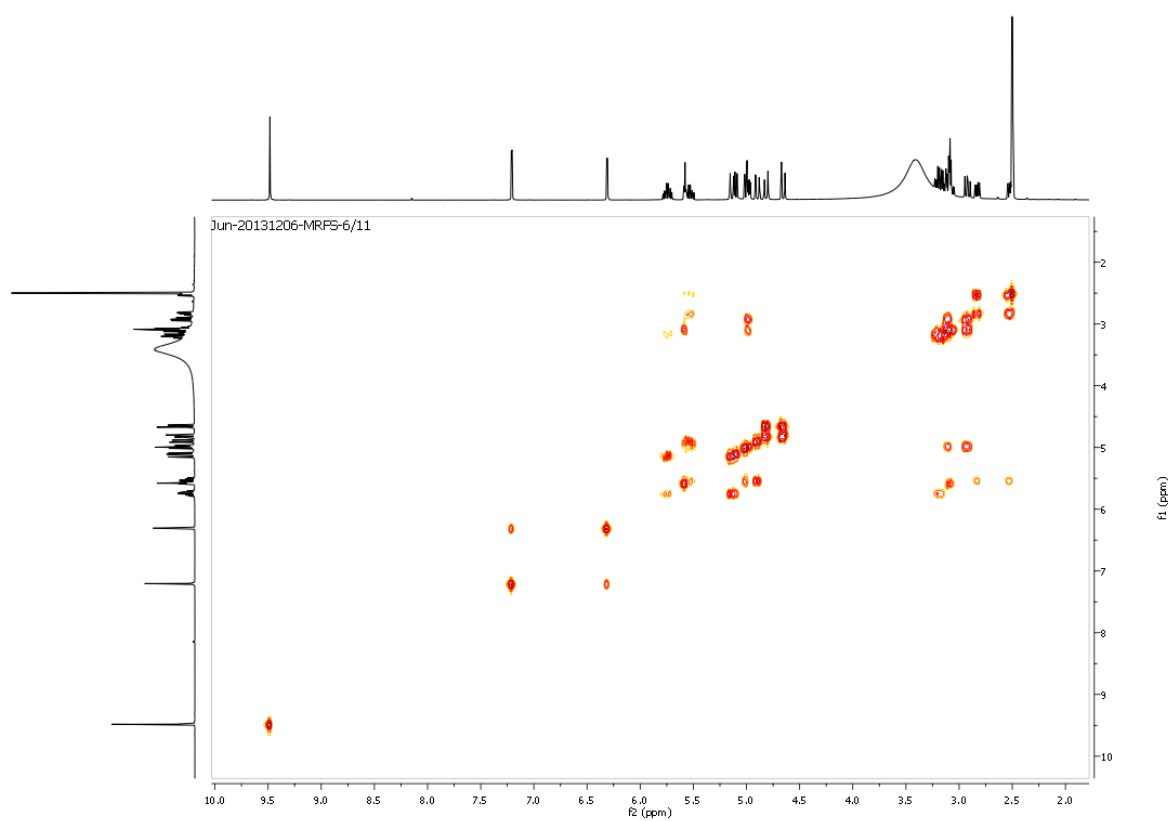

Figure S62. COSY correlations

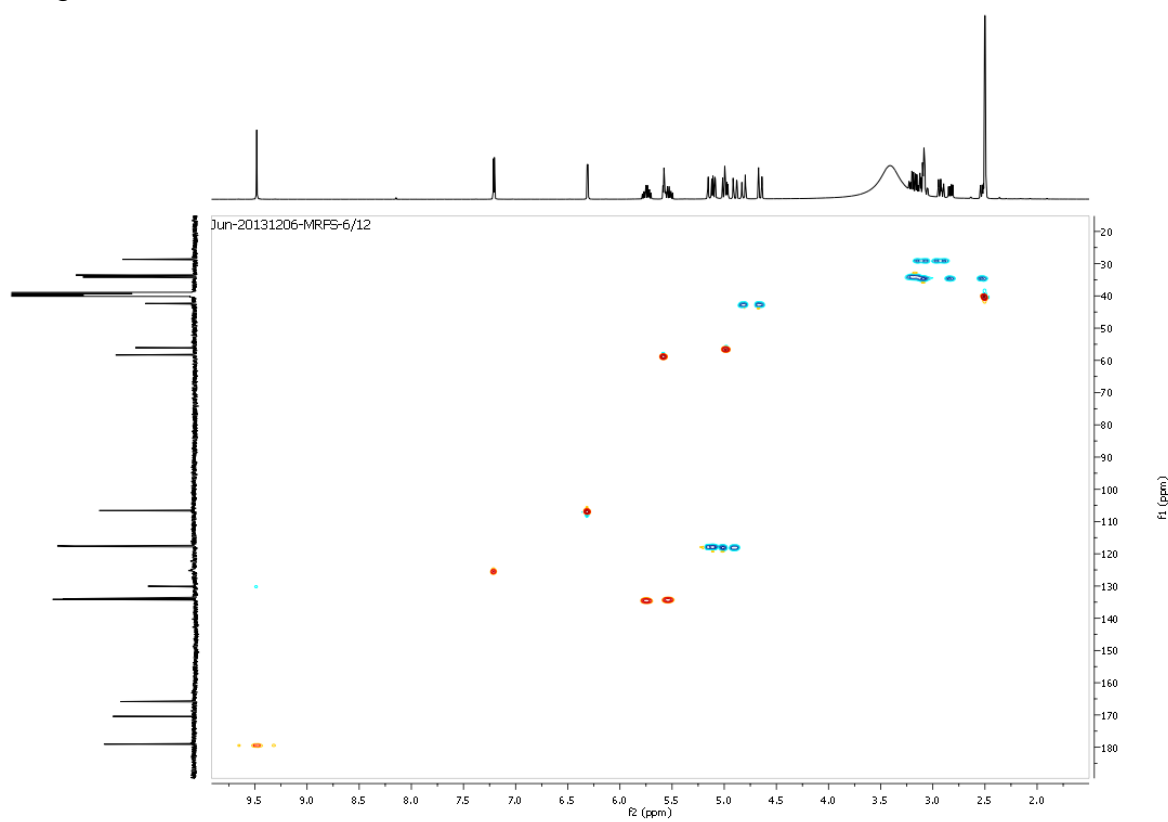

Figure S63. HSQC correlations

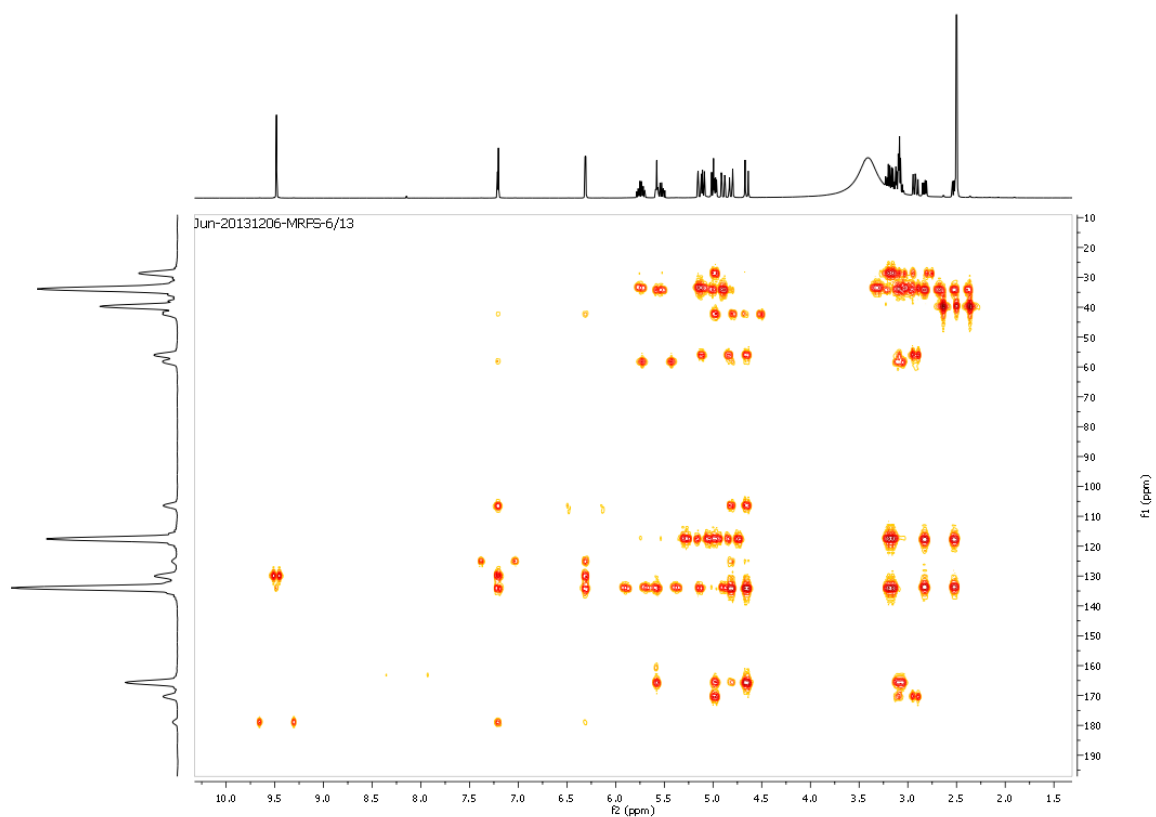

Figure S64. HMBC correlations

2-(allylthioethyl)-4-(allylthiomethyl)-3-oxo-3,4-dihydropyrrolo[1,2a]pyrazin-2(1*H*)-6-carbaldehyde (racemate of compound **10** and **11**)

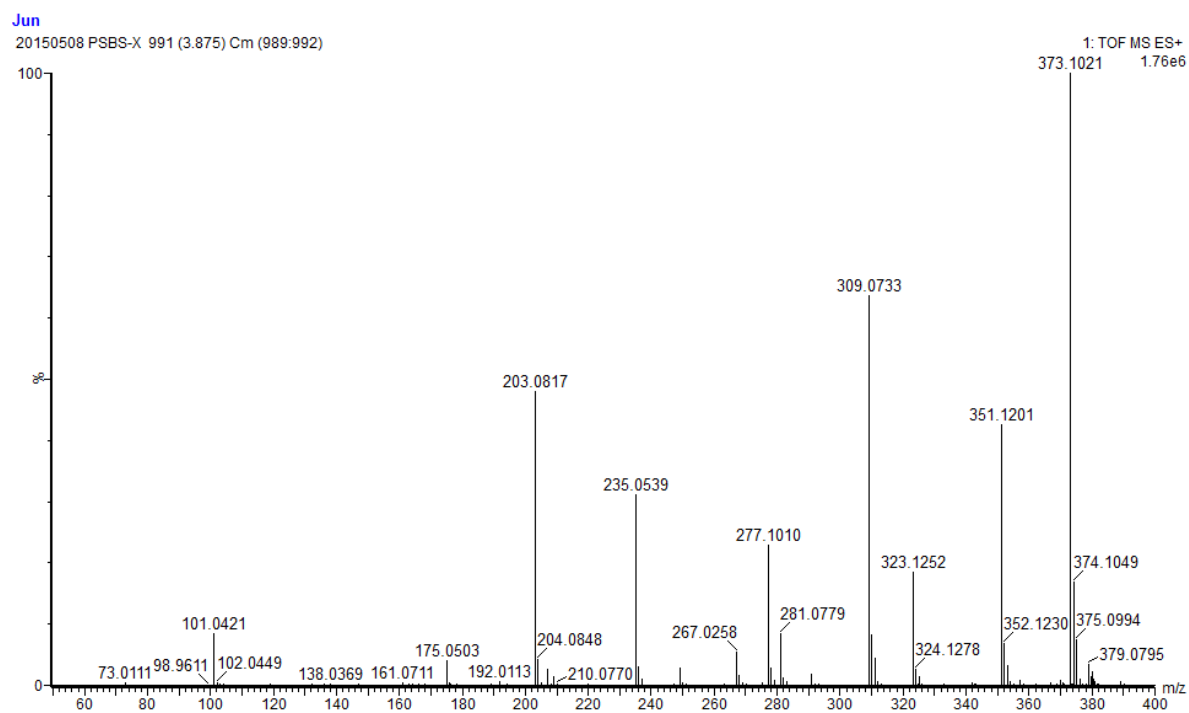

Figure S64. HRESIMS (negative) spectrum

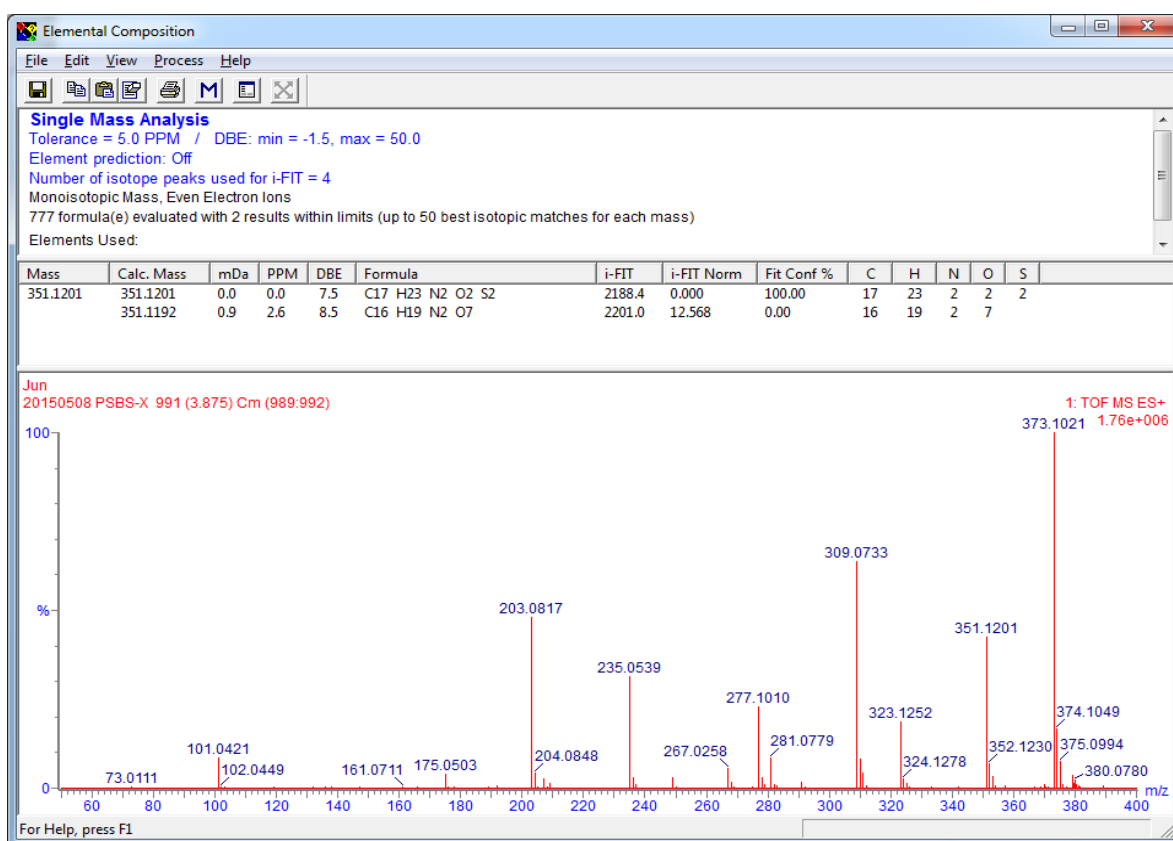

Figure S65. Elemental composition report of the precursor ion



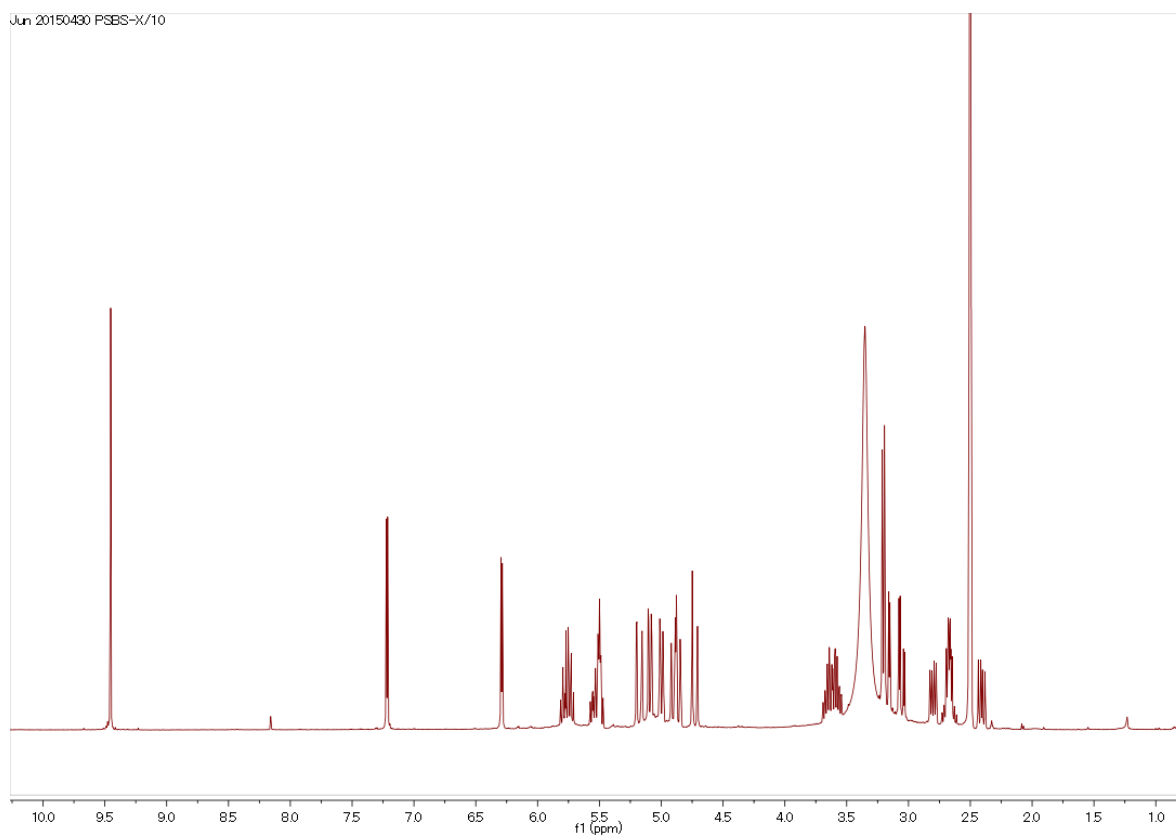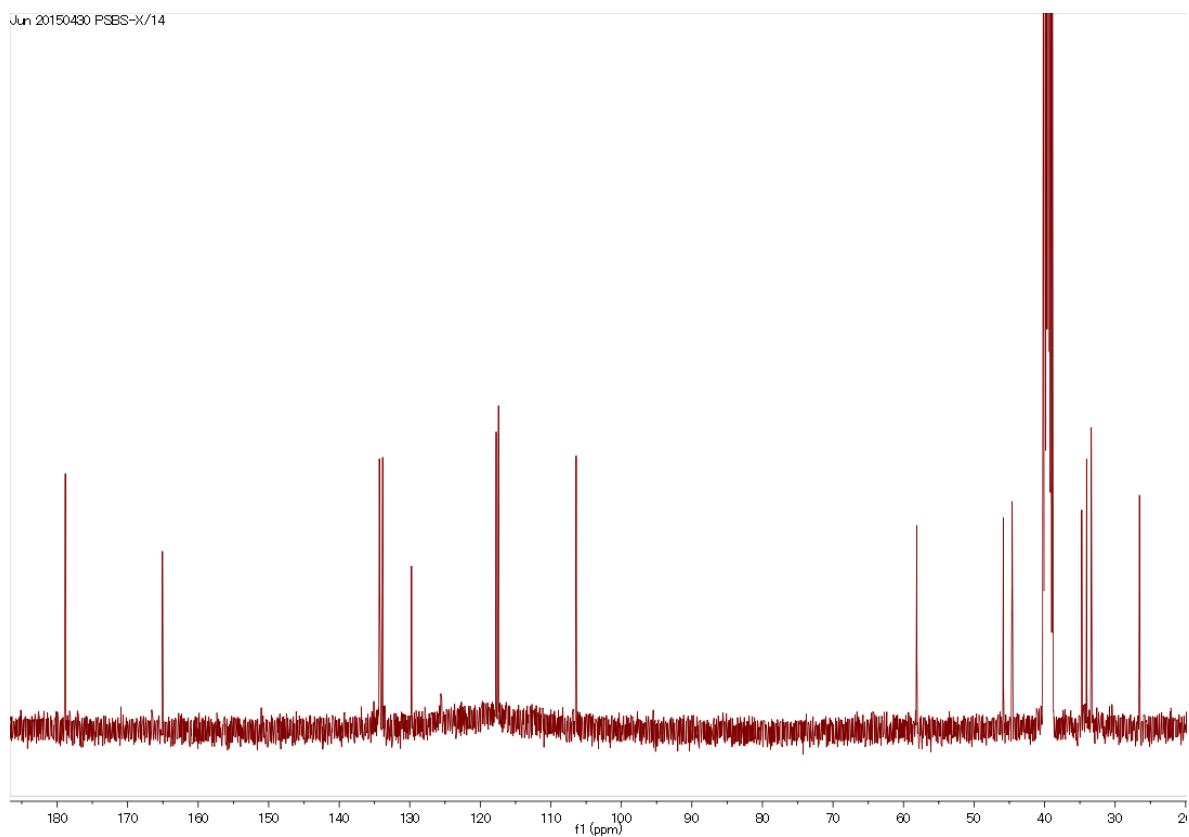

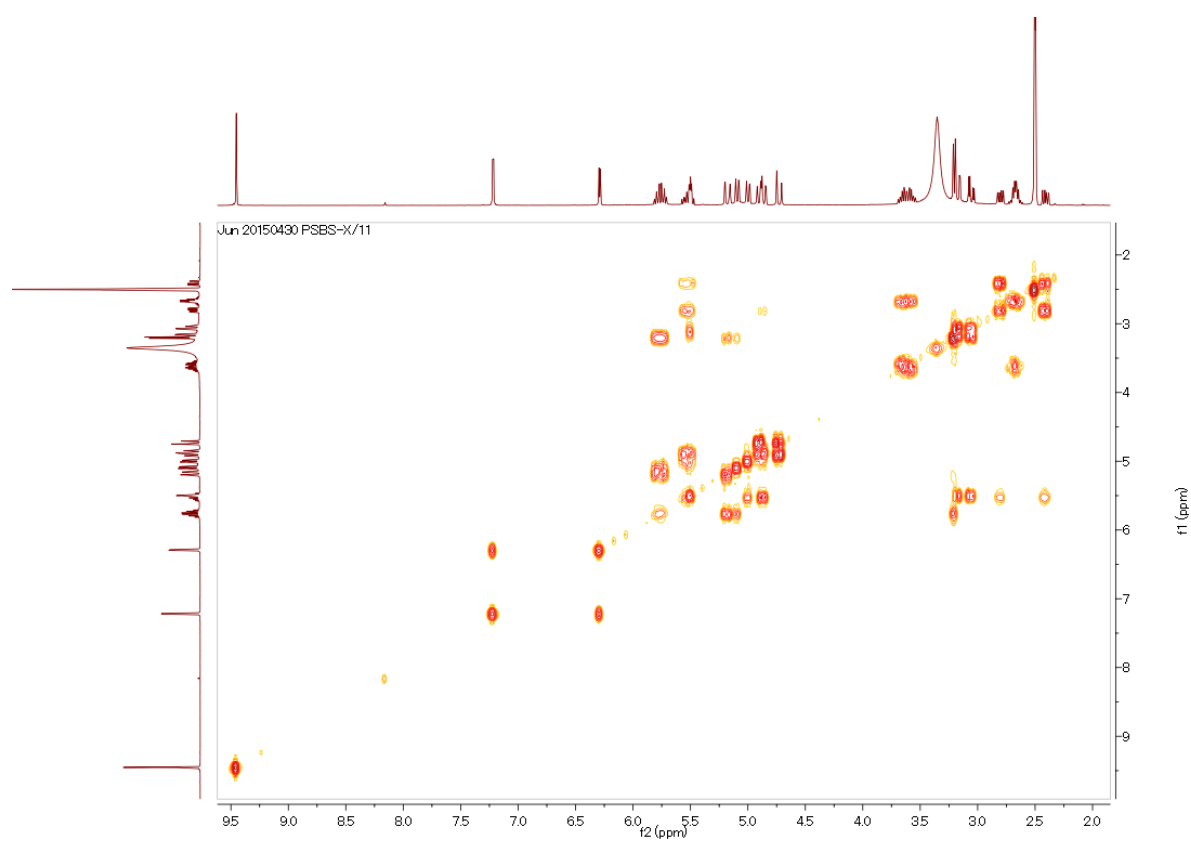

Figure S68. COSY correlations

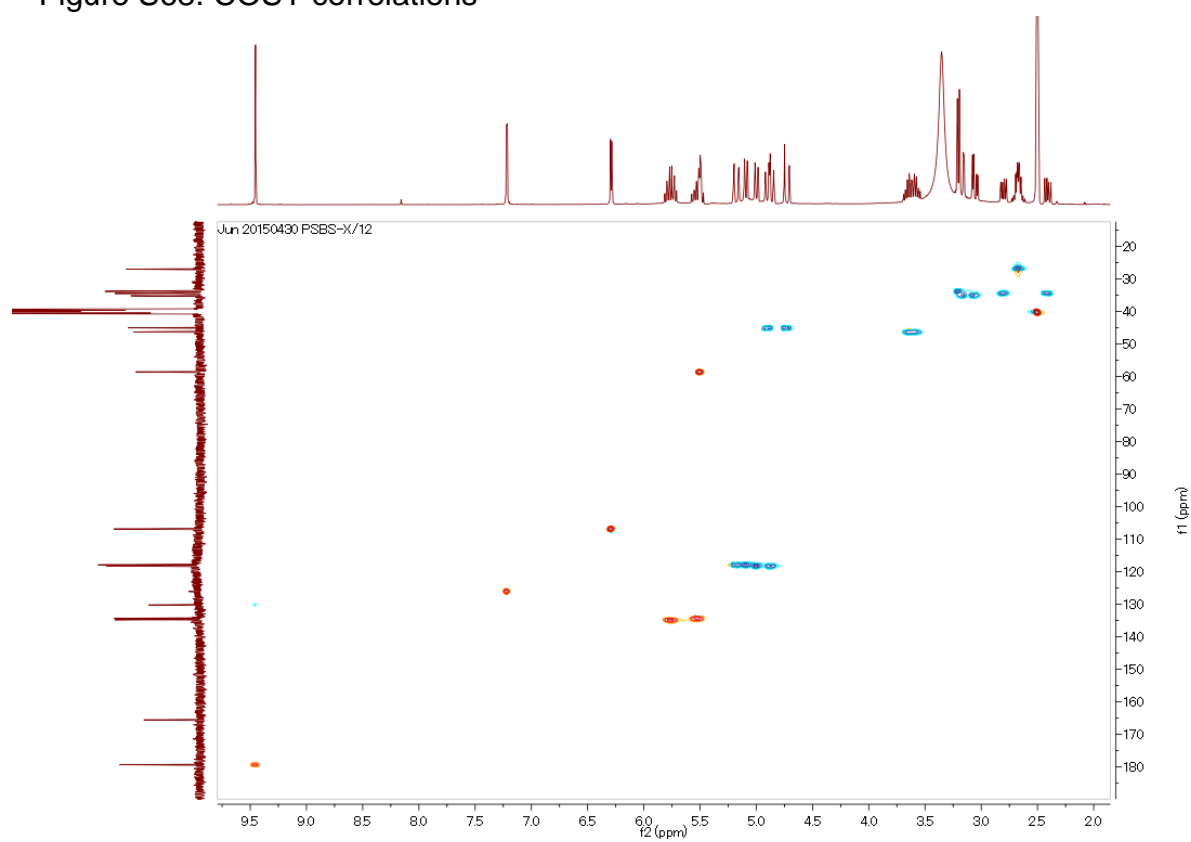

Figure S69. HSQC correlations

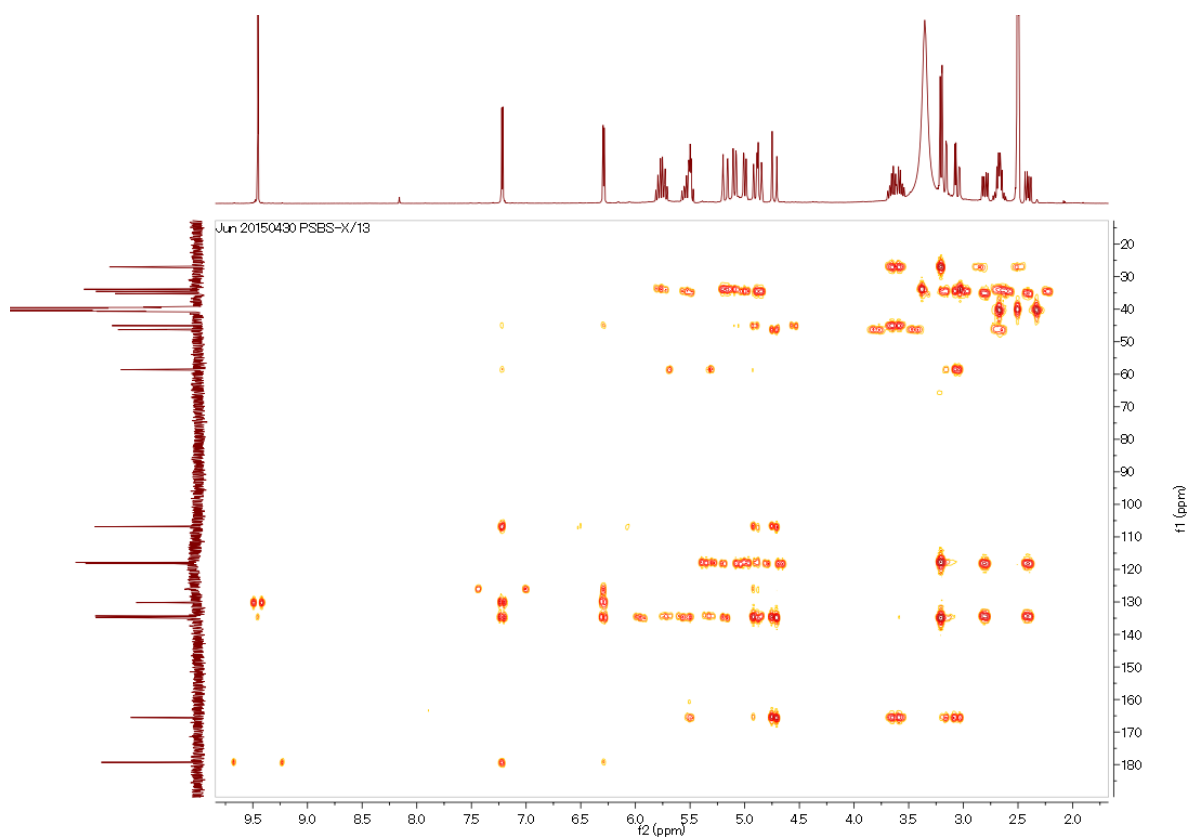

Figure S70. HMBC correlations

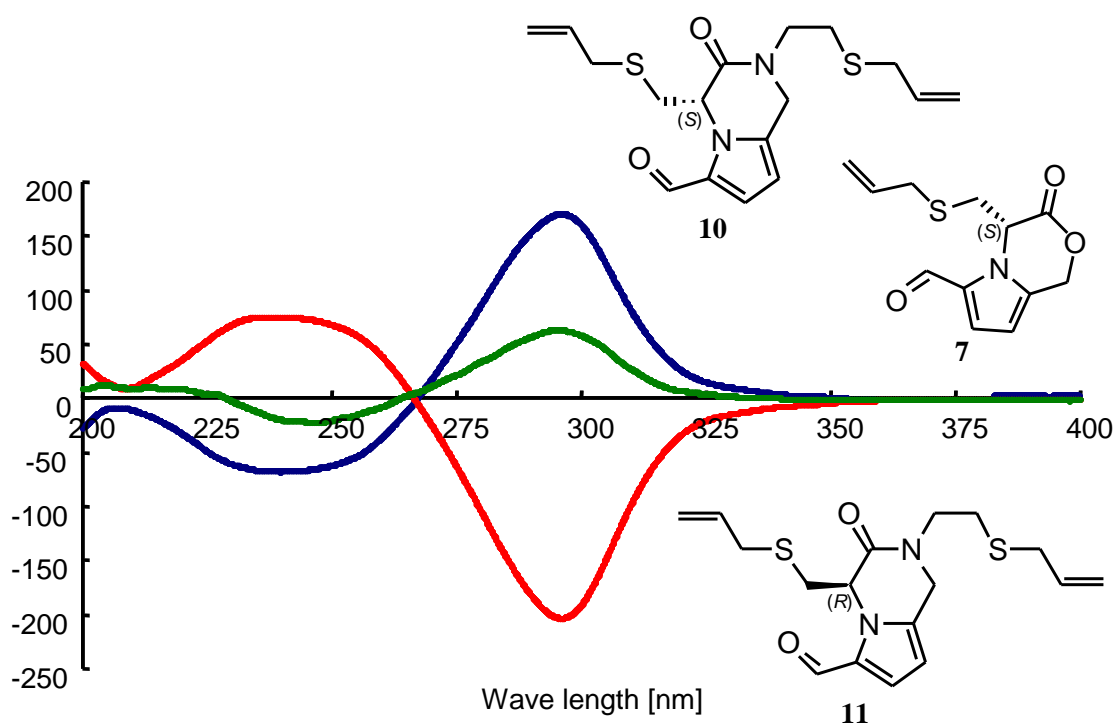

Figure S71. CD spectra of Maillard reaction product **7** (green) and synthesized references **10** (blue) and **11** (red)



### 3. Analytical conditions for quantitative analysis on identified compounds in garlic preparations

| Compounds | MW  | Gradient conditions                               | Mass transition<br>( <i>m/z</i> ) | Retention time<br>(min) | Cone voltage<br>(V) | Collision energy<br>(eV) |
|-----------|-----|---------------------------------------------------|-----------------------------------|-------------------------|---------------------|--------------------------|
| <b>1</b>  | 253 | 10%B → 20%B → 99%B<br>0 min      7 min      8 min | 254.2 → 206.1                     | 4.47                    | 4.0                 | 10.0                     |
| <b>2</b>  | 253 |                                                   | 254.2 → 206.1                     | 4.92                    | 4.0                 | 10.0                     |
| <b>3</b>  | 253 |                                                   | 254.2 → 206.1                     | 5.22                    | 4.0                 | 10.0                     |
| <b>4</b>  | 253 |                                                   | 254.2 → 206.1                     | 5.71                    | 4.0                 | 10.0                     |
| <b>5</b>  | 235 |                                                   | 258.3 → 200.1                     | 5.99                    | 35.0                | 11.0                     |
| <b>6</b>  | 269 | 30%B → 60%B → 99%B                                | 270.2 → 228.1                     | 2.00                    | 26.0                | 8.0                      |
| <b>7</b>  | 251 | 0 min      4 min      4.2 min                     | 252.2 → 178.0                     | 3.24                    | 22.0                | 16.0                     |
| <b>8</b>  | 394 |                                                   | 395.2 → 99.1                      | 3.79                    | 30.0                | 20.0                     |
| <b>9</b>  | 394 |                                                   | 395.2 → 99.1                      | 3.91                    | 30.0                | 20.0                     |

Table S2. UPLC-MS/MS (ESI) parameters for quantitative analysis on identified compounds.
